# Supplementary material for: Allopatry as a Gordian Knot for Taxonomists: Patterns of DNA Barcode Divergence in Arctic-Alpine Lepidoptera
Source: PubMed Central journal article supplement (PMC3469483; doi:10.1371/journal.pone.0047214), 2012-10-11
Supplement: pone.0047214.s001.pdf [file pone.0047214.s001.pdf]

Table S1. List of specimens with sequence and collection data information.

| Sample ID      | Seq. Length | Gen Bank accession # | Family       | Subfamily   | Species                    | Author           | Collectors                                      | Collection Date | Country        | Province                   | Region                  | Sector                               | Exact Site                                        | Lat          | Lon           | Dissection |
|----------------|-------------|----------------------|--------------|-------------|----------------------------|------------------|-------------------------------------------------|-----------------|----------------|----------------------------|-------------------------|--------------------------------------|---------------------------------------------------|--------------|---------------|------------|
| CNCLP00025485  | 655         | JX008152             | Tortricidae  | Tortricinae | Acleris maccana            | Treitschke       | JF Landry & L Humble                            | 02-Jun-2006     | Canada         | British Columbia           |                         | Surrey                               | Green Timbers Nursery & Arboretum                 | 49.17900085  | -122.8300018  |            |
| CNCLP0002774   | 658         | JX008418             | Tortricidae  | Tortricinae | Acleris maccana            | Treitschke       | JF Landry                                       | 07-Oct-2006     | Canada         | Quebec                     | Terrebonne              | Ste Agathe                           | 46.088012E                                        | -74.2789993E |               |            |
| CNCLP00029411  | 658         | JX008124             | Tortricidae  | Tortricinae | Acleris maccana            | Treitschke       | D Holder                                        | 24-Aug-2006     | Canada         | British Columbia           |                         | Bute Inlet                           | 45.8150003E                                       | -124.860000E |               |            |
| DNA-ATBI-2155  | 658         | JX008260             | Tortricidae  | Tortricinae | Acleris maccana            | Treitschke       | Michaels Pogut                                  | 20-May-2005     | United States  | Tennessee                  | Haywood                 | Poll's Gap, Rough Fork Tra           | 35.5640993E                                       | -83.1613998E |               |            |
| DNA-ATBI-2154  | 658         | JX008191             | Tortricidae  | Tortricinae | Acleris maccana            | Treitschke       | Adams                                           | 20-May-2005     | United States  | Tennessee                  | Sevier                  | 4700', Just below upper tunnel, east | BLBT10                                            | 35.6178016E  | -83.4191970E  |            |
| DNA-ATBI-2155  | 658         | JX008172             | Tortricidae  | Tortricinae | Acleris maccana            | Treitschke       | Adams                                           | 20-May-2005     | United States  | Tennessee                  | Sevier                  | 4700', Just below upper tunnel, east | BLBT10                                            | 35.6178016E  | -83.4191970E  |            |
| iflandry1751   | 614         | JX008155             | Tortricidae  | Tortricinae | Acleris maccana            | Treitschke       | L. Scott                                        | 15-Apr-2005     | Canada         | Ontario                    | Ottawa-Carleton         | Dunrobin                             | 122 Dunhaven Driv                                 | 45.409998E   | -76.0579986E  |            |
| MDH00089K      | 658         | JX008276             | Tortricidae  | Tortricinae | Acleris maccana            | Treitschke       | Daniel Handfield                                | 24-Apr-2005     | Canada         | Quebec                     | La Presentation         |                                      | Rang 5 Andre Racico                               | 45.688991E   | -73.0879974E  |            |
| MDH00194E      | 658         | JX008498             | Tortricidae  | Tortricinae | Acleris maccana            | Treitschke       | Daniel Handfield                                | 02-Oct-2005     | Canada         | Quebec                     | Ste-Christine           |                                      | Boise Julien Picard                               | 45.8510009E  | -72.4479980E  |            |
| MDH00195I      | 658         | JX008104             | Tortricidae  | Tortricinae | Acleris maccana            | Treitschke       | Daniel Handfield                                | 02-Oct-2005     | Canada         | Quebec                     | Ste-Christine           |                                      | Boise Julien Picard                               | 45.8510009E  | -72.4479980E  |            |
| MDH00206E      | 658         | JX008205             | Tortricidae  | Tortricinae | Acleris maccana            | Treitschke       | Daniel Handfield                                | 22-Apr-2005     | Canada         | Quebec                     | Ste-Christine           |                                      | Boise Julien Picard                               | 45.8510009E  | -72.4479980E  |            |
| MDH00212E      | 658         | JX008313             | Tortricidae  | Tortricinae | Acleris maccana            | Treitschke       | Daniel Handfield                                | 17-Apr-2005     | Canada         | Quebec                     | Mont-St-Hilaire         |                                      | Rue Noiseu                                        | 45.5439987E  | -74.25        |            |
| MDH00214C      | 658         | JX008331             | Tortricidae  | Tortricinae | Acleris maccana            | Treitschke       | Daniel Handfield                                | 13-Apr-2005     | Canada         | Quebec                     | La Presentation         |                                      | Rang 5 Andre Racico                               | 45.688991E   | -73.0879974E  |            |
| MDH00282C      | 575         | JX008200             | Tortricidae  | Tortricinae | Acleris maccana            | Treitschke       | Daniel Handfield                                | 19-Apr-2005     | Canada         | Quebec                     | CAN.QC -Mont-St-Hilaire |                                      | Chez L. Handfield                                 | 45.528993E   | -73.1790008E  |            |
| MDH00282C      | 657         | JX008224             | Tortricidae  | Tortricinae | Acleris maccana            | Treitschke       | Daniel Handfield                                | 07-May-2005     | Canada         | Quebec                     | CAN.QC -Mont-St-Hilaire |                                      | 545 boul Laurier                                  | 45.5680007E  | -73.1750003E  |            |
| MM08197        | 658         | HM873813             | Tortricidae  | Tortricinae | Acleris maccana            | Treitschke       | Marko Mutaner, Panu Vaelimaeki                  |                 | Finland        |                            |                         |                                      | Kolari                                            | 67.2760098E  | 23.7530026E   |            |
| MM0829E        | 658         | HM87385E             | Tortricidae  | Tortricinae | Acleris maccana            | Treitschke       | Marko Mutaner                                   |                 | Finland        |                            |                         |                                      | Inari                                             | 68.7880020E  | 27.0990009E   |            |
| MM08762        | 658         | HM874067             | Tortricidae  | Tortricinae | Acleris maccana            | Treitschke       | Marko Mutaner, Nestori Mutaner, Anttoni Mutane  | 02-May-2008     | Finland        |                            |                         |                                      | Kiiminki                                          | 65.0709991E  | 25.7250003E   |            |
| MM13882        | 658         | HM875780             | Tortricidae  | Tortricinae | Acleris maccana            | Treitschke       | Marko Mutaner                                   |                 | Finland        |                            |                         |                                      | Tornio                                            | 65.8980026E  | 24.4549999E   |            |
| MM17981        | 658         | JX034630             | Tortricidae  | Tortricinae | Acleris maccana            | Treitschke       | Marko Mutaner                                   |                 | Finland        |                            |                         |                                      | Kolari                                            | 67.2761001E  | 23.7525005E   |            |
| NoA-08-097     | 658         | JX008467             | Tortricidae  | Tortricinae | Acleris maccana            | Treitschke       | D.A. Macaulay                                   | 19-Apr-2003     | Canada         | Alberta                    |                         |                                      | Holmes Crossing Eco Res, 7.3 km SE Ft Assiniboine | 54.3030014E  | -114.8119965E |            |
| NoA-08-134     | 658         | JX008479             | Tortricidae  | Tortricinae | Acleris maccana            | Treitschke       |                                                 | 05-Apr-1996     | Canada         | Alberta                    |                         |                                      | Edmonton                                          | 53.5390014E  | -113.460998E  |            |
| NoA-08-135     | 658         | JX008116             | Tortricidae  | Tortricinae | Acleris maccana            | Treitschke       |                                                 | 12-Apr-1996     | Canada         | Alberta                    |                         |                                      | Wagner Natural Area                               | 53.5680007E  | -113.824996E  |            |
| NoA-08-136     | 658         | JX008370             | Tortricidae  | Tortricinae | Acleris maccana            | Treitschke       |                                                 | 27-Apr-2001     | Canada         | Alberta                    |                         |                                      | Gainford                                          | 53.5849906E  | -114.787002E  |            |
| NoA-08-137     | 658         | JX008289             | Tortricidae  | Tortricinae | Acleris maccana            | Treitschke       | D.A. Macaulay                                   | 06-Jun-2002     | Canada         | Alberta                    |                         |                                      | Colin-Cornwall Lakes Wildland                     | 59.5569921E  | -110.2750015E |            |
| NoA-08-138     | 587         | JX008105             | Tortricidae  | Tortricinae | Acleris maccana            | Treitschke       | M. Michaelian et al                             | 14-Sep-1995     | Canada         | Saskatchewan               |                         |                                      | Prov Pk nr. Big River                             | 54.002993E   | -107.261001E  |            |
| TLMF Lep 0284  | 658         | JF860323             | Tortricidae  | Tortricinae | Acleris maccana            | Treitschke       | Huemer P                                        | 02-May-2005     | Austria        | Vorarlberg                 | Umg.Dombirr             |                                      | Boedele, Fohramoo                                 | 47.4169998E  | 9.80000191E   |            |
| TLMF Lep 0284  | 658         | JF860324             | Tortricidae  | Tortricinae | Acleris maccana            | Treitschke       | Huemer P                                        | 02-May-2005     | Austria        | Vorarlberg                 | Umg.Dombirr             |                                      | Boedele, Fohramoo                                 | 47.4169998E  | 9.80000191E   |            |
| TLMF Lep 02881 | 658         | JF860341             | Tortricidae  | Tortricinae | Acleris maccana            | Treitschke       | Jaros J. & Spitzer K.                           | 01-Oct-2002     | Czech Republic | Bohemia                    |                         |                                      | Sumava Mt., Mrtvy luh near Volary                 | 48.8670058E  | 13.8669996E   |            |
| TLMF Lep 02882 | 658         | JF860342             | Tortricidae  | Tortricinae | Acleris maccana            | Treitschke       | Jaros J. & Spitzer K.                           | 24-Oct-2004     | Czech Republic | Bohemia                    |                         |                                      | Novohradské hory Mts., Pohorske                   | 48.599984E   | 14.6829961E   |            |
| TLMF Lep 0297  | 658         | JF860404             | Tortricidae  | Tortricinae | Acleris maccana            | Treitschke       | Huemer P                                        | 02-May-2005     | Austria        | Vorarlberg                 | Churchill               |                                      | 14 km E Churchill, Golf Balls                     | 47.4210014E  | 9.80599975E   |            |
| 07PROBE-00581  | 658         | JX008426             | Tortricidae  | Tortricinae | Aethes deutschiana         | Zetterstedt      | J.deWeerd                                       | 16-Jul-2007     | Canada         | Manitoba                   | Churchill               |                                      | 13 km E Churchill, Eastern Creel                  | 58.7564999E  | -93.93199921E |            |
| 07PROBE-1006E  | 658         | JX008338             | Tortricidae  | Tortricinae | Aethes deutschiana         | Zetterstedt      | P.D.N. Heber                                    | 16-Jul-2007     | Canada         | Manitoba                   | Churchill               |                                      | 13 km E Churchill, Eastern Creel                  | 58.7550010E  | -93.94400024E |            |
| 08BLEP-02400   | 658         | JX008401             | Tortricidae  | Tortricinae | Aethes deutschiana         | Zetterstedt      | J.Straka,J.Cossey                               | 24-Jul-2008     | Canada         | Alberta                    | Waterton                |                                      | Waterton Lakes Nat. Park - Rowe Trailhead         | 49.0569921E  | -114.0110016E |            |
| 09PROBE-09357  | 658         | HM375613             | Tortricidae  | Tortricinae | Aethes deutschiana         | Zetterstedt      | P.D.N. Hebert                                   | 26-Jul-2009     | Canada         | Manitoba                   | Churchill               |                                      | 26 km SE Churchill, Twin Lakes burn site          | 58.6199983E  | -93.8300018E  |            |
| 09PROBE-0940E  | 658         | HM37565E             | Tortricidae  | Tortricinae | Aethes deutschiana         | Zetterstedt      | P.D.N. Heber                                    | 27-Jul-2009     | Canada         | Manitoba                   | Churchill               |                                      | 23 km E Churchill, Ramsay Cree                    | 58.729995E   | -93.7799987E  |            |
| 09PROBE-0940E  | 632         | HM37566E             | Tortricidae  | Tortricinae | Aethes deutschiana         | Zetterstedt      | P.D.N. Heber                                    | 30-Jul-2005     | Canada         | Manitoba                   | Churchill               |                                      | 11 km S Churchill, Goose Cree                     | 58.659998E   | -94.1699981E  |            |
| 09PROBE-0944E  | 658         | HM37569E             | Tortricidae  | Tortricinae | Aethes deutschiana         | Zetterstedt      | P.D.N. Heber                                    | 30-Jul-2005     | Canada         | Manitoba                   | Churchill               |                                      | 11 km S Churchill, Goose Cree                     | 58.659998E   | -94.1699981E  |            |
| 09PROBE-0944E  | 658         | HM37569E             | Tortricidae  | Tortricinae | Aethes deutschiana         | Zetterstedt      | P.D.N. Heber                                    | 30-Jul-2005     | Canada         | Manitoba                   | Churchill               |                                      | 11 km S Churchill, Goose Cree                     | 58.659998E   | -94.1699981E  |            |
| 09PROBE-0944E  | 658         | HM37570E             | Tortricidae  | Tortricinae | Aethes deutschiana         | Zetterstedt      | P.D.N. Heber                                    | 28-Jul-2006     | Canada         | Manitoba                   | Churchill               |                                      | 26 km SE Churchill, Twin Lake                     | 58.6300010E  | -93.81900024E |            |
| 09PROBE-0947E  | 658         | HM37573E             | Tortricidae  | Tortricinae | Aethes deutschiana         | Zetterstedt      | P.D.N. Heber                                    | 28-Jul-2006     | Canada         | Manitoba                   | Churchill               |                                      | 23 km E Churchill, Ramsay Cree                    | 58.729995E   | -93.7799987E  |            |
| 09PROBE-0948E  | 658         | HM37573E             | Tortricidae  | Tortricinae | Aethes deutschiana         | Zetterstedt      | P.D.N. Heber                                    | 28-Jul-2006     | Canada         | Manitoba                   | Churchill               |                                      | 23 km E Churchill, Ramsay Cree                    | 58.729995E   | -93.7799987E  |            |
| 09PROBE-0948E  | 658         | HM37573E             | Tortricidae  | Tortricinae | Aethes deutschiana         | Zetterstedt      | P.D.N. Heber                                    | 28-Jul-2006     | Canada         | Manitoba                   | Churchill               |                                      | 23 km E Churchill, Ramsay Cree                    | 58.729995E   | -93.7799987E  |            |
| 09PROBE-0949E  | 658         | HM37574E             | Tortricidae  | Tortricinae | Aethes deutschiana         | Zetterstedt      | P.D.N. Heber                                    | 28-Jul-2006     | Canada         | Manitoba                   | Churchill               |                                      | 23 km E Churchill, Ramsay Cree                    | 58.729995E   | -93.7799987E  |            |
| 09PROBE-0949E  | 658         | HM37574E             | Tortricidae  | Tortricinae | Aethes deutschiana         | Zetterstedt      | P.D.N. Heber                                    | 28-Jul-2006     | Canada         | Manitoba                   | Churchill               |                                      | 23 km E Churchill, Ramsay Cree                    | 58.729995E   | -93.7799987E  |            |
| 09PROBE-0957E  | 658         | HM37582E             | Tortricidae  | Tortricinae | Aethes deutschiana         | Zetterstedt      | P.D.N. Heber                                    | 26-Jul-2006     | Canada         | Manitoba                   | Churchill               |                                      | 26 km SE Churchill, Twin Lake                     | 58.6199983E  | -93.7799987E  |            |
| 09PROBE-09592  | 658         | HM430239             | Tortricidae  | Tortricinae | Aethes deutschiana         | Zetterstedt      | P.D.N. Hebert                                   | 26-Jul-2009     | Canada         | Manitoba                   | Churchill               |                                      | 26 km SE Churchill, Twin Lakes burn site          | 58.6199983E  | -93.8300018E  |            |
| MM00084        | 658         | HM39636E             | Tortricidae  | Tortricinae | Aethes deutschiana         | Zetterstedt      | Marko Mutaner                                   |                 | Finland        |                            |                         |                                      | Enontekiö                                         | 68.9970016E  | 20.7439994E   |            |
| MM04121        | 658         | HM39691E             | Tortricidae  | Tortricinae | Aethes deutschiana         | Zetterstedt      | Marko Mutaner                                   |                 | Finland        |                            |                         |                                      | Enontekiö                                         | 68.9970016E  | 20.7439994E   |            |
| MM06320        | 658         | HM873198             | Tortricidae  | Tortricinae | Aethes deutschiana         | Zetterstedt      | Marko Mutaner, Anttoni Mutaner, Nestori Mutaner | 28-Jun-2006     | Finland        |                            |                         |                                      | Lapponia inarenis                                 | 69.8550033E  | 27            |            |
| NoA-08-144     | 658         | JX008274             | Tortricidae  | Tortricinae | Aethes deutschiana         | Zetterstedt      | Schmid J.                                       | 29-Jul-2005     | Canada         | Alberta                    |                         |                                      | Kakwa Wildland Prov Pk                            | 54.1150016E  | -119.938003E  |            |
| TLMF Lep 02701 | 658         | JF860231             | Tortricidae  | Tortricinae | Aethes deutschiana         | Zetterstedt      | Schmid J.                                       | 16-Jul-2009     | Canada         | Switzerland                | Graubunden              |                                      | Avers-Cresta, Cucalner/Guaemue Col Agnel          | 46.5019989E  | 9.48499965E   |            |
| TLMF Lep 02858 | 639         | JX034623             | Tortricidae  | Tortricinae | Aethes deutschiana         | Zetterstedt      | Nel J.                                          | 22-Jul-2001     | France         | Provence-Alpes-Cote d'Azur |                         |                                      | Col de l'Izoard                                   | 44.8089981E  | 6.984000206E  | 13254JN    |
| TLMF Lep 02859 | 608         | JX034651             | Tortricidae  | Tortricinae | Aethes deutschiana         | Zetterstedt      | Nel J.                                          | 04-Jul-2004     | France         | Provence-Alpes-Cote d'Azur |                         |                                      | Col de l'Izoard                                   | 44.8089981E  | 6.761000156E  | 17256JN    |
| TLMF Lep 02860 | 658         | JX034633             | Tortricidae  | Tortricinae | Aethes deutschiana         | Zetterstedt      | Nel J.                                          | 04-Jul-2004     | France         | Provence-Alpes-Cote d'Azur |                         |                                      | Col de l'Izoard                                   | 44.8089981E  | 6.761000156E  | 17234JN    |
| MM10662        | 658         | HM874840             | Incurvaridae |             | Allochemensia mesospilella | Herrich-Schäffer | Marko Mutaner, Panu Vaelimaeki                  |                 | Finland        |                            |                         |                                      | Lapponia kemensis pars orientalis                 | 67.1539993E  | 27.85400009E  |            |
| MM10668        | 658         | HM874844             | Incurvaridae |             | Allochemensia mesospilella | Herrich-Schäffer | Marko Mutaner, Panu Vaelimaeki                  |                 | Finland        |                            |                         |                                      | Lapponia kemensis pars orientalis                 | 67.1539993E  | 27.85400009E  |            |
| MM17932        | 658         | JF853993             | Incurvaridae |             | Allochemensia mesospilella | Herrich-Schäffer | Sami Haapala                                    | 02-Jun-2009     | Finland        |                            |                         |                                      | Lappeenranta                                      | 61.0638999E  | 28.722295E    |            |
| TLMF Lep 00553 | 658         | HM381395             | Incurvaridae |             | Allochemensia mesospilella | Herrich-Schäffer | Huemer P.                                       | 13-Jul-2009     | Austria        | Karnten                    |                         |                                      | Petzen N. Umg. Gh. Siebenhuetten                  | 46.51819992E | 14.77350044E  |            |
| MM0410C        | 658         | HM38689E             | Noctuidae    | Noctuidae   | Anarta melanopa            | Thunberg         | Marko Mutaner                                   |                 | Finland        |                            |                         |                                      | Enontekiö                                         | 68.9970016E  | 20.7439994E   |            |
| MM0410E        | 658         | HM38689E             | Noctuidae    | Noctuidae   | Anarta melanopa            | Thunberg         | Marko Mutaner                                   |                 | Finland        |                            |                         |                                      | Enontekiö                                         | 68.9970016E  | 20.7439994E   |            |
| MM1458C        | 658         | HM87617E             | Noctuidae    | Noctuidae   | Anarta melanopa            | Thunberg         | Marko Mutaner                                   |                 | Finland        |                            |                         |                                      | Lapponia enontekiensis                            | 69.0630035E  | 21.1019992E   |            |

|                    |     |           |              |               |                           |                  |                                       |             |               |                            |                                      |                                                           |                                       |             |              |
|--------------------|-----|-----------|--------------|---------------|---------------------------|------------------|---------------------------------------|-------------|---------------|----------------------------|--------------------------------------|-----------------------------------------------------------|---------------------------------------|-------------|--------------|
| MM17997            | 658 | JF854051  | Noctuidae    | Noctuidae     | Anarta melanopa           | Thunberg         | Marko Mutanen, Nestori Mutanen,       | 10-Jul-2010 | Finland       |                            | Lapponia inarensis                   | Utsjoki                                                   | 69,82800293                           | 27          |              |
| TLMF Lep 0193f     | 658 | HQ96835f  | Noctuidae    | Noctuidae     | Anarta melanopa           | Thunberg         | Marko Mutanen, Nestori Mutanen,       | 10-Jul-2010 | Finland       |                            | Lapponia inarensis                   | Utsjoki                                                   | 69,82800293                           | 27          |              |
| TLMF Lep 0270f     | 658 | JF860233f | Noctuidae    | Noctuidae     | Anarta melanopa           | Thunberg         | Marko Mutanen, Nestori Mutanen,       | 10-Jul-2010 | Finland       |                            | Lapponia inarensis                   | Utsjoki                                                   | 69,82800293                           | 27          |              |
| MM0214f            | 575 | HM87142f  | Tortricidae  | Olethreutinae | Ancylis habeler           | Huemer & Tarmann | Marko Mutanen, Panu Vaelimael         | 10-Apr-2007 | Finland       | Tyrol Graubunder           | Osttiro                              | Zentralalper                                              | Panargenkamm: Weisser Klapp           | 46,9860000f | 12,27420044  |
| MM0535f            | 636 | HM87278f  | Tortricidae  | Olethreutinae | Ancylis habeleri          | Huemer & Tarmann | Marko Mutanen                         |             | Finland       | Lansi-Suomen Laani         | Savonia australis                    | Regio Aboensis                                            | Valis, Dachberg                       | 46,5919990f | 9,10239968f  |
| MM1383f            | 658 | HM87577f  | Tortricidae  | Olethreutinae | Ancylis habeler           | Huemer & Tarmann | Marko Mutanen, Panu Vaelimael         |             | Finland       |                            | Regio Aboensis                       |                                                           | Imatra                                | 61,1080017f | 28,7989997f  |
| MM1448f            | 658 | HM87612f  | Tortricidae  | Olethreutinae | Ancylis habeler           | Huemer & Tarmann | Marko Mutanen, Panu Vaelimael         |             | Finland       |                            | Regio Aboensis                       |                                                           | Turku                                 | 60,4410018f | 22,2019996f  |
| MM1448f            | 658 | HM87612f  | Tortricidae  | Olethreutinae | Ancylis habeler           | Huemer & Tarmann | Marko Mutanen, Panu Vaelimael         |             | Finland       |                            | Regio Aboensis                       |                                                           |                                       | 60,2620010f | 23,0249996f  |
| MM1448f            | 658 | HM87612f  | Tortricidae  | Olethreutinae | Ancylis habeler           | Huemer & Tarmann | Marko Mutanen, Panu Vaelimael         |             | Finland       |                            | Regio Aboensis                       |                                                           |                                       | 60,2620010f | 23,0249996f  |
| MM1448f            | 658 | HM87612f  | Tortricidae  | Olethreutinae | Ancylis habeler           | Huemer & Tarmann | Marko Mutanen, Panu Vaelimael         |             | Finland       |                            | Regio Aboensis                       |                                                           |                                       | 60,2620010f | 23,0249996f  |
| MM1729f            | 642 | JX03466f  | Tortricidae  | Olethreutinae | Ancylis habeler           | Huemer & Tarmann | Marko Mutanen, Panu Vaelimael         |             | Finland       |                            | Regio Aboensis                       |                                                           |                                       | 60,340999f  | 23,110000f   |
| MM1729f            | 658 | JX03467f  | Tortricidae  | Olethreutinae | Ancylis habeler           | Huemer & Tarmann | Marko Mutanen, Panu Vaelimael         |             | Finland       |                            | Regio Aboensis                       |                                                           |                                       | 60,340999f  | 23,110000f   |
| MM1729f            | 658 | JX03468f  | Tortricidae  | Olethreutinae | Ancylis habeler           | Huemer & Tarmann | Marko Mutanen, Panu Vaelimael         |             | Finland       |                            | Regio Aboensis                       |                                                           |                                       | 60,340999f  | 23,110000f   |
| TLMF Lep 0278f     | 658 | JF86028f  | Tortricidae  | Olethreutinae | Ancylis habeler           | Huemer & Tarmann | Marko Mutanen, Panu Vaelimael         | 18-Jun-2002 | Austria       | Tyrol                      | Osttiro                              |                                                           | Dorfermaehder/ Praegraten NW          | 47,0250015f | 12,3710002f  |
| ACOC Lep 0036f     | 658 | JX03464f  | Noctuidae    | Amphipyriinae | Apamea maillardi          | Geyer            | Huemer P.                             | 03-Aug-2011 | Spain         | Lleida                     | Lerida, Catalunf                     |                                                           | Valle de Arar                         | 42,6912002f | 0,90175998f  |
| BC ZSM Lep 4852f   | 658 | JX03469f  | Noctuidae    | Amphipyriinae | Apamea maillardi          | Geyer            | Huemer P.                             | 05-Aug-2008 | France        | Provence-Alpes-Cote d'Azur |                                      | Embrun, Les Orres, Torrent d'Vachers                      | 44,5167007f                           | 6,55000019f |              |
| TLMF Lep 0031f     | 658 | HM42581f  | Noctuidae    | Amphipyriinae | Apamea maillardi          | Geyer            | Huemer P.                             | 20-Jul-2009 | Italy         |                            | Belluno                              |                                                           | Passo di Valparola E - Passo Falzareg | 46,522399f  | 12,0069999f  |
| TLMF Lep 0041f     | 658 | HM42589f  | Noctuidae    | Amphipyriinae | Apamea maillardi          | Geyer            | Huemer P.                             | 23-Jul-2009 | Italy         |                            | Cuneo                                |                                                           | Colle Valcavera NE/ Demonte NW        | 44,3843994f | 7,10638999f  |
| TLMF Lep 0246f     | 658 | JF86009f  | Noctuidae    | Amphipyriinae | Apamea maillardi          | Geyer            | Huemer P.                             | 19-Jul-2010 | Italy         | South Tyro                 |                                      | Ritten/ Obergruenwal                                      | 46,5970001f                           | 11,4399001f |              |
| TLMF Lep 0270f     | 658 | JF86023f  | Noctuidae    | Amphipyriinae | Apamea maillardi          | Geyer            | Huemer P.                             | 22-Jun-2000 | Switzerland   | South Tyro                 |                                      | Zervreil/ Valf                                            | 46,5779991f                           | 9,12300014f |              |
| TLMF Lep 0553f     | 658 | JX03459f  | Noctuidae    | Amphipyriinae | Apamea maillardi          | Geyer            | Huemer P. & Tarmann G. M.             | 28-Jul-2011 | Macedonia     |                            |                                      | Mavrovo NP, Korab, Korabaska jezero, Kobilino polk Muonio | 41,7779998f                           | 20,5820007f |              |
| MM0920f            | 658 | HM87416f  | Noctuidae    | Amphipyriinae | Apamea schildei           | Staudinger       | Petri Hirvonen                        | 30-Jul-2008 | Finland       |                            | Lapponia kemensis pars occidentalis  |                                                           |                                       | 67,9120026f | 23,6639996f  |
| MM1107f            | 658 | HM87498f  | Noctuidae    | Amphipyriinae | Apamea schilde            | Staudinger       | Marko Mutanen                         | 19-Jul-2005 | Finland       |                            | Regio kuusamoensis                   |                                                           | Salla                                 | 66,6819992f | 28,5839996f  |
| MM1107f            | 658 | HM87498f  | Noctuidae    | Amphipyriinae | Apamea schilde            | Staudinger       | Marko Mutanen                         | 17-Jul-2005 | Finland       |                            | Regio kuusamoensis                   |                                                           | Salla                                 | 66,6819992f | 28,5839996f  |
| MM1747f            | 658 | JF85386f  | Noctuidae    | Amphipyriinae | Apamea schilde            | Staudinger       | Juhani Itoemies                       | 23-Aug-2008 | Finland       |                            | Kuusanc                              |                                                           | Salla                                 | 67,6589965f | 29,3570003f  |
| MM1875f            | 658 | JF85460f  | Noctuidae    | Amphipyriinae | Apamea schilde            | Staudinger       | Reima Leinoner                        | 16-Jul-199f | Finland       |                            | Karelia borealis                     |                                                           | Lieksa                                | 63,7400016f | 24,2460002f  |
| MM1875f            | 658 | JF85460f  | Noctuidae    | Amphipyriinae | Apamea schilde            | Staudinger       | Reima Leinoner                        | 17-Jul-2001 | Finland       |                            |                                      |                                                           |                                       |             |              |
| MM1875f            | 658 | JF85460f  | Noctuidae    | Amphipyriinae | Apamea schilde            | Staudinger       | Reima Leinoner                        | 18-Jul-2001 | Finland       |                            |                                      |                                                           |                                       |             |              |
| MM1875f            | 658 | JF85460f  | Noctuidae    | Amphipyriinae | Apamea schilde            | Staudinger       | Reima Leinoner                        | 18-Jul-2001 | Finland       |                            |                                      |                                                           |                                       |             |              |
| MM1875f            | 658 | JF85460f  | Noctuidae    | Amphipyriinae | Apamea schilde            | Staudinger       | Reima Leinoner                        | 19-Jul-2001 | Finland       |                            |                                      |                                                           |                                       |             |              |
| MM1875f            | 658 | JF85460f  | Noctuidae    | Amphipyriinae | Apamea schilde            | Staudinger       | Reima Leinoner                        | 16-Jul-199f | Finland       |                            |                                      |                                                           |                                       |             |              |
| MM1875f            | 658 | JF85460f  | Noctuidae    | Amphipyriinae | Apamea schilde            | Staudinger       | Reima Leinoner                        | 18-Jul-2001 | Finland       |                            |                                      |                                                           |                                       |             |              |
| ACOC Lep 0037f     | 658 | JX03467f  | Noctuidae    | Amphipyriinae | Apamea zeti               | Treitschke       | Reima Leinoner                        | 03-Aug-2011 | Spain         | Lleida                     |                                      |                                                           | Valle de Arar                         | 62,9080009f | 30,301000f   |
| CNCNoctuoidea1038  | 658 | JX00843f  | Noctuidae    | Amphipyriinae | Apamea zeti               | Treitschke       | Reima Leinoner                        | 27-Jul-199f | Canada        | Quebec                     |                                      |                                                           | Post de la Baleini                    | 65,6299972f | 24,0030002f  |
| CNCNoctuoidea1038  | 658 | JX00843f  | Noctuidae    | Amphipyriinae | Apamea zeti               | Treitschke       | Reima Leinoner                        | 03-Aug-199f | Canada        | Quebec                     |                                      |                                                           | Post de la Baleini                    | 65,6299972f | 24,0030002f  |
| CNCNoctuoidea1389f | 638 | JX00821f  | Noctuidae    | Amphipyriinae | Apamea zeta               | Treitschke       | Reima Leinoner                        | 17-Jul-2007 | United States | Colorado                   |                                      |                                                           | Pikes Peak East face, El Paso County  | 43,9080009f | 30,301000f   |
| CNCNoctuoidea1389f | 658 | JX00825f  | Noctuidae    | Amphipyriinae | Apamea zeta               | Treitschke       | S.A. Johnson                          | 17-Jul-2007 | United States | Colorado                   |                                      |                                                           | Pikes Peak East face, El Paso County  | 43,9080009f | 30,301000f   |
| CNCNoctuoideaE01f  | 527 | JX03466f  | Noctuidae    | Amphipyriinae | Apamea zeti               | Treitschke       | S.A. Johnson                          | 17-Jul-2007 | United States | Colorado                   |                                      |                                                           | Pikes Peak East face, El Paso County  | 43,9080009f | 30,301000f   |
| CNCNoctuoideaE01f  | 517 | JX03461f  | Noctuidae    | Amphipyriinae | Apamea zeti               | Treitschke       | M. Fibiger                            | 08-Aug-199f | France        |                            |                                      |                                                           | Restiforc                             | 46,522399f  | 12,0069999f  |
| CNCNoctuoideaE01f  | 597 | JX03459f  | Noctuidae    | Amphipyriinae | Apamea zeti               | Treitschke       | S. Beschkov                           | 10-Aug-199f | Bulgaria      |                            |                                      |                                                           | Mousale                               | 46,522399f  | 12,0069999f  |
| CNCNoctuoideaE01f  | 658 | JX03462f  | Noctuidae    | Amphipyriinae | Apamea zeti               | Treitschke       | G Stengelmaif                         | 25-Jul-199f | Romania       |                            |                                      |                                                           | Bileasate                             | 59,9269981f | 23,9549993f  |
| CNCNoctuoideaE02f  | 658 | JX03468f  | Noctuidae    | Amphipyriinae | Apamea zeti               | Treitschke       | F. Scheper                            | 04-Aug-198f | Austria       |                            |                                      |                                                           | Montggl/ Kleiner Pric                 | 59,9269981f | 23,9549993f  |
| CNCNoctuoideaE02f  | 557 | JX03467f  | Noctuidae    | Amphipyriinae | Apamea zeti               | Treitschke       | A. Zili                               | 10-Jul-2003 | Italy         | Abruzzi                    |                                      |                                                           | Montggl/ Kleiner Pric                 | 46,4280014f | 11,3000001f  |
| TLMF Lep 0024f     | 632 | HM42575f  | Noctuidae    | Amphipyriinae | Apamea zeti               | Treitschke       | P. Provera                            | 27-Aug-199f | Switzerland   |                            |                                      |                                                           | Graubundenpredr                       | 68,9970016f | 20,7439994f  |
| TLMF Lep 0032f     | 658 | HM42582f  | Noctuidae    | Amphipyriinae | Apamea zeta               | Treitschke       | Huemer P.                             | 13-Jul-200f | Austria       | Karnten                    |                                      |                                                           | Petzen N, Obere Kriisch               | 61,1080017f | 28,7989997f  |
| TLMF Lep 0041f     | 658 | HM42589f  | Noctuidae    | Amphipyriinae | Apamea zeta               | Treitschke       | Huemer P.                             | 20-Jul-2009 | Italy         |                            | Belluno                              |                                                           | Passo di Valparola E - Passo Falzareg | 46,522399f  | 12,0069999f  |
| TLMF Lep 0046f     | 658 | HM42593f  | Noctuidae    | Amphipyriinae | Apamea zeta               | Treitschke       | Huemer P.                             | 25-Jul-2009 | France        | Provence-Alpes-Cote d'Azur |                                      |                                                           | Col de la Moutiere SE/ W St.          | 44,3067016f | 6,80999994f  |
| TLMF Lep 0195f     | 658 | HQ96836f  | Noctuidae    | Amphipyriinae | Apamea zeta               | Treitschke       | Huemer P.                             | 14-Jul-2010 | Italy         | Abruzzi                    | L' Aquila                            |                                                           | Dalmas le Selvag                      | 42,4267005f | 13,7132997f  |
| TLMF Lep 0270f     | 483 | JX03469f  | Noctuidae    | Amphipyriinae | Apamea zeti               | Treitschke       | Schmid J.                             | 22-Aug-2001 | Switzerland   |                            | Graubunder                           |                                                           | Imperatore, ex Miniera di Lignit      | 46,8650016f | 9,23299980f  |
| TLMF Lep 0556f     | 658 | JX03469f  | Noctuidae    | Amphipyriinae | Apamea zeta               | Treitschke       | Huemer P. & Tarmann G. M.             | 28-Jul-2011 | Macedonia     |                            |                                      |                                                           | Nagens/ Laa                           | 46,8650016f | 9,23299980f  |
| TLMF Lep 0556f     | 658 | JX03464f  | Noctuidae    | Amphipyriinae | Apamea zeta               | Treitschke       | Huemer P. & Tarmann G. M.             | 28-Jul-2011 | Macedonia     |                            |                                      |                                                           | Mavrovo NP, Korab, eastern ridge      | 41,7859993f | 20,5790004f  |
| MM1764f            | 658 | JX03467f  | Oecophoridae | Oecophorinae  | Aplota nigricans          | Zeller           | Kaitila, Salin, Palen, Ratinen, Vindr |             | Finland       |                            | Nylandia                             |                                                           | Inkoo                                 | 59,9269981f | 23,9549993f  |
| MM1764f            | 658 | JX03464f  | Oecophoridae | Oecophorinae  | Aplota nigricans          | Zeller           | Kaitila, Salin, Palen, Ratinen, Vindr |             | Finland       |                            | Nylandia                             |                                                           | Inkoo                                 | 59,9269981f | 23,9549993f  |
| MM1765f            | 658 | JX03466f  | Oecophoridae | Oecophorinae  | Aplota nigricans          | Zeller           | Kaitila, Salin, Palen, Ratinen, Vindr |             | Finland       |                            | Nylandia                             |                                                           | Inkoo                                 | 59,9269981f | 23,9549993f  |
| TLMF Lep 0174f     | 658 | JF86095f  | Oecophoridae | Oecophorinae  | Aplota nigricans          | Zeller           | Kaitila, Salin, Palen, Ratinen, Vindr | 30-Jun-2010 | Italy         | South Tyro                 |                                      |                                                           | Montggl/ Kleiner Pric                 | 46,4280014f | 11,3000001f  |
| TLMF Lep 0211f     | 658 | JF85970f  | Oecophoridae | Oecophorinae  | Aplota nigricans          | Zeller           | Kaitila, Salin, Palen, Ratinen, Vindr | 04-Jun-2010 | Italy         | South Tyro                 |                                      |                                                           | Montggl/ Kleiner Pric                 | 46,4280014f | 11,3000001f  |
| MM0344f            | 658 | HQ57030f  | Tortricidae  | Olethreutinae | Argyroploce arbutellif    | Linnaeus         | Marko Mutanen                         |             | Finland       |                            | Lappi                                |                                                           | Enontekio                             | 68,9970016f | 20,7439994f  |
| MM1239f            | 658 | HM87526f  | Tortricidae  | Olethreutinae | Argyroploce arbutellif    | Linnaeus         | Marko Mutanen, Panu Vaelimael         |             | Finland       |                            | Savonia australis                    |                                                           | Imatra                                | 61,1080017f | 28,7989997f  |
| MM1451f            | 658 | HM87614f  | Tortricidae  | Olethreutinae | Argyroploce arbutellif    | Linnaeus         | Marko Mutanen                         | 10-Jul-2009 | Finland       |                            | Ostrobothnia borealis pars australis |                                                           | Hailuoto                              | 25,0069999f | 65           |
| TLMF Lep 0168f     | 658 | HQ96898f  | Tortricidae  | Olethreutinae | Argyroploce arbutellif    | Linnaeus         | Huemer P.                             | 16-Jul-2010 | Italy         | Lazio                      |                                      |                                                           | Monte Terminillo I                    | 42,4832992f | 13           |
| TLMF Lep 0168f     | 658 | HQ96898f  | Tortricidae  | Olethreutinae | Argyroploce arbutellif    | Linnaeus         | Huemer P.                             | 16-Jul-2010 | Italy         | Lazio                      |                                      |                                                           | Monte Terminillo I                    | 42,4832992f | 13           |
| MM0008f            | 658 | HM39636f  | Tortricidae  | Olethreutinae | Argyroploce noricana      | Herrich-Schaffer | Marko Mutanen                         |             | Finland       |                            |                                      |                                                           | Enontekio                             | 68,9970016f | 20,7439994f  |
| MM0412f            | 407 | JX03457f  | Tortricidae  | Olethreutinae | Argyroploce noricana      | Herrich-Schaffer | Marko Mutanen                         |             | Finland       |                            |                                      |                                                           | Enontekio                             | 68,9970016f | 20,7439994f  |
| MM0704f            | 658 | JX03460f  | Tortricidae  | Olethreutinae | Argyroploce noricana      | Herrich-Schaffer | Marko Mutanen                         |             | Finland       |                            | Lappi                                |                                                           | Enontekio                             | 68,9970016f | 20,7439994f  |
| TLMF Lep 0060f     | 658 | HM38144f  | Tortricidae  | Olethreutinae | Argyroploce noricana      | Herrich-Schaffer | Huemer P.                             | 20-Jul-200f | Italy         |                            | Belluno                              |                                                           | Passo di Valparola E                  | 46,5255012f | 11,9997997f  |
| TLMF Lep 0060f     | 658 | HM38144f  | Tortricidae  | Olethreutinae | Argyroploce noricana      | Herrich-Schaffer | Huemer P.                             | 20-Jul-200f | Italy         |                            | Belluno                              |                                                           | Passo di Valparola E                  | 46,5255012f | 11,9997997f  |
| TLMF Lep 0075f     | 658 | HM42611f  | Tortricidae  | Olethreutinae | Argyroploce noricana      | Herrich-Schaffer | Huemer P.                             | 29-Jul-2008 | Austria       | Vorarlberg                 |                                      |                                                           | Umng. Goeppinger Huette, Gamsboden    | 47,2174987f | 10,03470039  |
| TLMF Lep 0105f     | 658 | HM38161f  | Tortricidae  | Olethreutinae | Argyroploce noricana      | Herrich-Schaffer | Huemer P.                             | 08-Jul-2007 | Italy         | South Tyro                 |                                      |                                                           | Schiern, Petz, Kalkschut              | 46,5120010f | 11,57499981f |
| TLMF Lep 0270f     | 620 | JX03467f  | Tortricidae  | Olethreutinae | Argyroploce noricana      | Herrich-Schaffer | Schmid J.                             | 26-Jul-200f | Switzerland   |                            | Graubunder                           |                                                           | Albulia Hospif                        | 46,5820007f | 9,83699989f  |
| MM0069f            | 658 | HM87113f  | Tortricidae  | Olethreutinae | Argyroploce roseomaculana | Herrich-Schaffer | Marko Mutanen                         | 09-Jul-2006 | Finland       |                            |                                      |                                                           | Ranua                                 |             |              |

|                  |     |          |             |               |                           |                  |                                   |                |            |                                      |                                            |                                          |              |              |
|------------------|-----|----------|-------------|---------------|---------------------------|------------------|-----------------------------------|----------------|------------|--------------------------------------|--------------------------------------------|------------------------------------------|--------------|--------------|
| MM15688          | 658 | HM876474 | Tortricidae | Olethreutinae | Argyroploce roseomaculana | Herrich-Schäffer | Meelika Mutanen, Atsalea Mutanen, | Finland        |            | Ostrobothnia borealis pars australis | Kiminki                                    | 65,0709915                               | 25,72500038  |              |
| MM15689          | 658 | HM876475 | Tortricidae | Olethreutinae | Argyroploce roseomaculana | Herrich-Schäffer | Meelika Mutanen, Atsalea Mutanen, | Finland        |            | Ostrobothnia borealis pars australis | Kiminki                                    | 65,0709915                               | 25,72500038  |              |
| MM1569C          | 658 | HM876476 | Tortricidae | Olethreutinae | Argyroploce roseomaculans | Herrich-Schäffer | Toni Mutanen                      | Finland        |            | Laponia enontekiensis                | Enontekiö                                  | 68,9869951                               | 20,49500084  |              |
| TLMF Lep 0283I   | 639 | JF860320 | Tortricidae | Olethreutinae | Argyroploce roseomaculans | Herrich-Schäffer | Huemer P                          | Italy          | South Tyro | Bad Ratzes S/ Seis am Schlen         |                                            | 46,5299987                               | 11,58600044  |              |
| TLMF Lep 0288I   | 658 | JF860343 | Tortricidae | Olethreutinae | Argyroploce roseomaculans | Herrich-Schäffer | Jaros J. & Spitzer K.             | Czech Republic | Bohemia    | Chroboly env., MiletinK              |                                            | 48,9169998                               | 14,0830001E  |              |
| TLMF Lep 0288I   | 658 | JF860344 | Tortricidae | Olethreutinae | Argyroploce roseomaculans | Herrich-Schäffer | Jaros J. & Spitzer K.             | Czech Republic | Bohemia    | Chroboly env., MiletinK              |                                            | 48,9169998                               | 14,0830001E  |              |
| TLMF Lep 0288I   | 658 | JF860345 | Tortricidae | Olethreutinae | Argyroploce roseomaculans | Herrich-Schäffer | Jaros J. & Spitzer K.             | Czech Republic | Bohemia    | Chroboly env., MiletinK              |                                            | 48,9169998                               | 14,0830001E  |              |
| BC ZSM Lep 2106I | 658 | HQ60106I | Geometridae | Ennominae     | Arichanna melanaria       | Linnaeus         | Kari Ambli                        | Germany        | Bavaria    | Upperr Bavari                        | Schlagenhofen a. Woerthsee                 | 48,0430984                               | 11,1736002   |              |
| BC ZSM Lep 2404I | 632 | GU65486I | Geometridae | Ennominae     | Arichanna melanaria       | Linnaeus         | A. Haslberger                     | Germany        | Bavaria    | Oberbayern                           | Imatra                                     | 47,805018I                               | 12,8472995E  |              |
| MM0135I          | 658 | HM38664I | Geometridae | Ennominae     | Arichanna melanaria       | Linnaeus         | Marko Mutanen, Panu Vaelimael     | Finland        |            | Imatra                               |                                            | 61,1080017I                              | 23,7389997I  |              |
| MM0135I          | 658 | HM38664I | Geometridae | Ennominae     | Arichanna melanaria       | Linnaeus         | Marko Mutanen, Panu Vaelimael     | Finland        |            | Imatra                               |                                            | 61,1080017I                              | 23,7389997I  |              |
| MM08115          | 658 | HM873784 | Geometridae | Ennominae     | Arichanna melanaria       | Linnaeus         | Marko Mutanen, Panu Vaelimael     | Finland        |            | Laponia kemensis pars occidentalis   | Kolari                                     | 67,2760098                               | 23,75300026  |              |
| TLMF Lep 0287I   | 658 | JF860339 | Geometridae | Ennominae     | Arichanna melanaria       | Linnaeus         | Huemer P                          | Austria        | Vorarlberg | Umg.Langenegg                        | Langenegg-Leiten, Fohrei                   | 47,4669990I                              | 9,883000374  |              |
| MM0334I          | 658 | HM871928 | Lycanidae   | Polyommatae   | Aricia nicias             | Meigen           | Marko Mutanen, Nestori Mutanen,   | Finland        |            | Ostrobothnia borealis pars australis | Kiminki                                    | 65,0709915                               | 25,72500038  |              |
| MM06112          | 658 | HM873047 | Lycanidae   | Polyommatae   | Aricia nicias             | Meigen           | Anttoni Mutanen Panu Vaelimael    | Finland        |            | Ostrobothnia borealis pars borealis  | Tornio                                     | 65,84899902                              | 24,1970005   |              |
| MM1466I          | 658 | HM87620I | Lycanidae   | Polyommatae   | Aricia nicias             | Meigen           | Marko Mutanen                     | Finland        |            | Ostrobothnia kajanseni               | Ristijaev                                  | 64,4260025                               | 28,1830005E  |              |
| TLMF Lep 0181I   | 658 | HQ96828I | Lycanidae   | Polyommatae   | Aricia nicias             | Meigen           | Mayr T.                           | Switzerland    | Graubunder | Val Bever, Alp Savrett               |                                            | 46,5499992I                              | 9,78332996I  |              |
| TLMF Lep 0182I   | 658 | HQ96828I | Lycanidae   | Polyommatae   | Aricia nicias             | Meigen           | Mayr T.                           | Switzerland    | Graubunder | Val Bever, Alp Savrett               |                                            | 46,5499992I                              | 9,78332996I  |              |
| TLMF Lep 0275I   | 658 | JF860269 | Lycanidae   | Polyommatae   | Aricia nicias             | Meigen           | Schmid J.                         | Switzerland    | Graubunder | V. Laschadour/ Zerne                 |                                            | 46,7050018I                              | 10,1549997I  |              |
| MM1562C          | 658 | HQ57040I | Gelechiidae | Gelechiinae   | Aristotelia hellacella    | Herrich-Schäffer | Marko Mutanen                     | Finland        |            | Laponia enontekiensis                | Enontekiö                                  | 68,997016E                               | 20,7439994E  |              |
| MM1562I          | 658 | HQ57040I | Gelechiidae | Gelechiinae   | Aristotelia hellacella    | Herrich-Schäffer | Marko Mutanen                     | Finland        |            | Laponia enontekiensis                | Enontekiö                                  | 68,997016E                               | 20,7439994E  |              |
| MM1821C          | 658 | JX034665 | Gelechiidae | Gelechiinae   | Aristotelia hellacella    | Herrich-Schäffer | Marko Mutanen                     | Finland        |            | Laponia enontekiensis                | Enontekiö                                  | 68,9965972E                              | 20,7437000I  |              |
| TLMF Lep 00613   | 658 | HM425989 | Gelechiidae | Gelechiinae   | Aristotelia hellacella    | Herrich-Schäffer | Tarmann G. M.                     | Italy          |            | Belluno                              | Passo di Valparola SW, Mt. Castell         | 46,52389908                              | 11,97669983  |              |
| TLMF Lep 00614   | 614 | HM425990 | Gelechiidae | Gelechiinae   | Aristotelia hellacella    | Herrich-Schäffer | Tarmann G. M.                     | Italy          |            | Belluno                              | Passo di Valparola SW, Mt. Castell         | 46,52389908                              | 11,97669983  |              |
| TLMF Lep 0270I   | 658 | JF860235 | Gelechiidae | Gelechiinae   | Aristotelia hellacella    | Herrich-Schäffer | Schmid J.                         | Switzerland    | Graubunder | Albula Hospiz                        |                                            | 46,5820007I                              | 9,83699989E  |              |
| 04HBL003062      | 658 | GU09667I | Nymphalidae | Heliconiinae  | Boloria eunomia           | Esper            | P.D.N. Hebert                     | Canada         | Manitoba   | Churchill                            | 22 km E Churchill, CNSC                    | 58,7299954                               | -93,81999969 |              |
| 04HBL003063      | 658 | GU09667E | Nymphalidae | Heliconiinae  | Boloria eunomia           | Esper            | P.D.N. Hebert                     | Canada         | Manitoba   | Churchill                            | 22 km E Churchill, CNSC                    | 58,7299954                               | -93,81999969 |              |
| 04HBL003064      | 658 | GU096675 | Nymphalidae | Heliconiinae  | Boloria eunomia           | Esper            | P.D.N. Hebert                     | Canada         | Manitoba   | Churchill                            | 22 km E Churchill, CNSC                    | 58,7299954                               | -93,81999969 |              |
| 04HBL003065      | 658 | GU096674 | Nymphalidae | Heliconiinae  | Boloria eunomia           | Esper            | P.D.N. Hebert                     | Canada         | Manitoba   | Churchill                            | 22 km E Churchill, CNSC                    | 58,7299954                               | -93,81999969 |              |
| 04HBL003067      | 658 | GU096679 | Nymphalidae | Heliconiinae  | Boloria eunomia           | Esper            | P.D.N. Hebert                     | Canada         | Manitoba   | Churchill                            | 22 km E Churchill, CNSC                    | 58,7299954                               | -93,81999969 |              |
| 04HBL003068      | 658 | GU096678 | Nymphalidae | Heliconiinae  | Boloria eunomia           | Esper            | P.D.N. Hebert                     | Canada         | Manitoba   | Churchill                            | 22 km E Churchill, CNSC                    | 58,7299954                               | -93,81999969 |              |
| 04HBL003069      | 658 | GU096677 | Nymphalidae | Heliconiinae  | Boloria eunomia           | Esper            | P.D.N. Hebert                     | Canada         | Manitoba   | Churchill                            | 22 km E Churchill, CNSC                    | 58,7299954                               | -93,81999969 |              |
| 04HBL003070      | 658 | GU096673 | Nymphalidae | Heliconiinae  | Boloria eunomia           | Esper            | P.D.N. Hebert                     | Canada         | Manitoba   | Churchill                            | 22 km E Churchill, CNSC                    | 58,7299954                               | -93,81999969 |              |
| 04HBL003071      | 658 | GU096672 | Nymphalidae | Heliconiinae  | Boloria eunomia           | Esper            | P.D.N. Hebert                     | Canada         | Manitoba   | Churchill                            | 22 km E Churchill, CNSC                    | 58,7299954                               | -93,81999969 |              |
| 04HBL003072      | 658 | GU096681 | Nymphalidae | Heliconiinae  | Boloria eunomia           | Esper            | P.D.N. Hebert                     | Canada         | Manitoba   | Churchill                            | 22 km E Churchill, CNSC                    | 58,7299954                               | -93,81999969 |              |
| 04HBL003073      | 658 | GU096680 | Nymphalidae | Heliconiinae  | Boloria eunomia           | Esper            | P.D.N. Hebert                     | Canada         | Manitoba   | Churchill                            | 22 km E Churchill, CNSC                    | 58,7299954                               | -93,81999969 |              |
| 07PROBE-0009I    | 658 | JX008469 | Nymphalidae | Heliconiinae  | Boloria eunomia           | Esper            | P.D.N. Heber                      | Canada         | Manitoba   | Churchill                            | 4 km SE Churchill, Dene Villagi            | 58,7350006I                              | -94,1190003I |              |
| 07PROBE-0009I    | 658 | JX008332 | Nymphalidae | Heliconiinae  | Boloria eunomia           | Esper            | P.D.N. Heber                      | Canada         | Manitoba   | Churchill                            | 4 km SE Churchill, Dene Villagi            | 58,7350006I                              | -94,1190003I |              |
| 07PROBE-00155    | 658 | JX008319 | Nymphalidae | Heliconiinae  | Boloria eunomia           | Esper            | P.D.N. Hebert                     | Canada         | Manitoba   | Churchill                            | 26 km SE Churchill, Twin Lakes burn site   | 58,6170005E                              | -93,8119964E |              |
| 07PROBE-00416    | 658 | JX008157 | Nymphalidae | Heliconiinae  | Boloria eunomia           | Esper            | J.deWaard                         | Canada         | Manitoba   | Churchill                            | 16 km E Churchill, Bird Cove, Rock Bluff C | 58,76499939                              | -93,8649978E |              |
| 07PROBE-0050I    | 658 | JX008222 | Nymphalidae | Heliconiinae  | Boloria eunomia           | Esper            | J.deWaard                         | Canada         | Manitoba   | Churchill                            | Town of Churchill                          | field S of Churchill train station       | 58,7669982I  | -94,176002E  |
| 07PROBE-0059I    | 658 | JX008308 | Nymphalidae | Heliconiinae  | Boloria eunomia           | Esper            | P.D.N. Heber                      | Canada         | Manitoba   | Churchill                            | 26 km SE Churchill, Twin Lake              | 58,63199997                              | -93,81900024 |              |
| 07PROBE-0387I    | 621 | JX008314 | Nymphalidae | Heliconiinae  | Boloria eunomia           | Esper            | P.D.N. Heber                      | Canada         | Manitoba   | Churchill                            | 4 km SE Churchill, Dene Villagi            | 58,7350006I                              | -94,1190003I |              |
| 07PROBE-0388I    | 658 | JX008408 | Nymphalidae | Heliconiinae  | Boloria eunomia           | Esper            | P.D.N. Heber                      | Canada         | Manitoba   | Churchill                            | 4 km SE Churchill, Dene Villagi            | 58,7350006I                              | -94,1190003I |              |
| 07PROBE-03887    | 658 | JX008133 | Nymphalidae | Heliconiinae  | Boloria eunomia           | Esper            | P.D.N. Hebert                     | Canada         | Manitoba   | Churchill                            | 26 km SE Churchill, Twin Lakes fen         | 58,63199997                              | -93,7880020I |              |
| 07PROBE-03892    | 658 | JX008491 | Nymphalidae | Heliconiinae  | Boloria eunomia           | Esper            | P.D.N. Hebert                     | Canada         | Manitoba   | Churchill                            | 26 km SE Churchill, Twin Lakes fen         | 58,63199997                              | -93,7880020I |              |
| 07PROBE-0392I    | 658 | JX008357 | Nymphalidae | Heliconiinae  | Boloria eunomia           | Esper            | P.D.N. Heber                      | Canada         | Manitoba   | Churchill                            | 16 km E Churchill, Bird Cove               | Tundra Pond Area                         | 58,7680015E  | -93,8580017I |
| 07PROBE-0443I    | 658 | JX008345 | Nymphalidae | Heliconiinae  | Boloria eunomia           | Esper            | C.Hastings                        | Canada         | Manitoba   | Churchill                            | 4 km SE Churchill, Dene Villagi            | 58,7330017I                              | -94,1149978E |              |
| 07PROBE-1004I    | 658 | JX008402 | Nymphalidae | Heliconiinae  | Boloria eunomia           | Esper            | P.D.N. Heber                      | Canada         | Manitoba   | Churchill                            | 22 km E Churchill, CNSC                    | 58,7379989E                              | -93,81900024 |              |
| 07PROBE-1005I    | 658 | JX008110 | Nymphalidae | Heliconiinae  | Boloria eunomia           | Esper            | P.D.N. Heber                      | Canada         | Manitoba   | Churchill                            | 13 km E Churchill, Eastern Creel           | 58,7550010I                              | -93,94400024 |              |
| 07PROBE-1005I    | 658 | JX008452 | Nymphalidae | Heliconiinae  | Boloria eunomia           | Esper            | P.D.N. Heber                      | Canada         | Manitoba   | Churchill                            | 13 km E Churchill, Eastern Creel           | 58,7550010I                              | -93,94400024 |              |
| 07PROBE-1005I    | 658 | JX008227 | Nymphalidae | Heliconiinae  | Boloria eunomia           | Esper            | P.D.N. Heber                      | Canada         | Manitoba   | Churchill                            | 13 km E Churchill, Eastern Creel           | 58,7550010I                              | -93,94400024 |              |
| 07PROBE-1005I    | 658 | JX008231 | Nymphalidae | Heliconiinae  | Boloria eunomia           | Esper            | P.D.N. Heber                      | Canada         | Manitoba   | Churchill                            | 13 km E Churchill, Eastern Creel           | 58,7550010I                              | -93,94400024 |              |
| 07PROBE-1011I    | 658 | JX008343 | Nymphalidae | Heliconiinae  | Boloria eunomia           | Esper            | P.D.N. Heber                      | Canada         | Manitoba   | Churchill                            | 16 km E Churchill, tundra pond             | 58,7550010I                              | -93,9150009E |              |
| 07PROBE-1087I    | 658 | JX008444 | Nymphalidae | Heliconiinae  | Boloria eunomia           | Esper            | P.D.N. Heber                      | Canada         | Manitoba   | Churchill                            | 26 km SE Churchill, Twin Lake              | 58,6300010I                              | -93,81900024 |              |
| 08BLEP-02677     | 658 | JX008102 | Nymphalidae | Heliconiinae  | Boloria eunomia           | Esper            | J.Straka,J.Cossey                 | Canada         | Alberta    | Banff                                | Banff Nat. Park - Sunshine Meadow          | 51,0610082                               | -115,783996E |              |
| 09PROBE-09569    | 658 | HM375820 | Nymphalidae | Heliconiinae  | Boloria eunomia           | Esper            | P.D.N. Hebert                     | Canada         | Manitoba   | Churchill                            | 26 km SE Churchill, Twin Lakes burn site   | 58,61999893                              | -93,83000183 |              |
| 09PROBE-09590    | 658 | HM430237 | Nymphalidae | Heliconiinae  | Boloria eunomia           | Esper            | P.D.N. Hebert                     | Canada         | Manitoba   | Churchill                            | 26 km SE Churchill, Twin Lakes burn site   | 58,61999893                              | -93,83000183 |              |
| BC ZSM Lep 2154I | 658 | JF415682 | Nymphalidae | Heliconiinae  | Boloria eunomia           | Esper            | P.Schwarzbauei                    | Germany        | Bavaria    | Oberbayern                           | Koenigsdorf, Weitzitz                      | 47,8166999E                              | 11,4499998I  |              |
| BC ZSM Lep 25470 | 658 | GU655024 | Nymphalidae | Heliconiinae  | Boloria eunomia           | Esper            | Wolfgang Schacht                  | Germany        | Bavaria    | Oberbayern                           | Landsberg a.Lech                           | Dessen am Ammersee, Vilaertshofener Fors | 47,94649887  | 10,91539955  |
| BC ZSM Lep 3217I | 658 | JF415681 | Nymphalidae | Heliconiinae  | Boloria eunomia           | Esper            | M. Seizmaier                      | Germany        | Bavaria    | Oberbayern                           | Bad Toelz-Wolfratshause                    | 47,8045005E                              | 11,4636001E  |              |
| BC ZSM Lep 5312I | 658 | JX034677 | Nymphalidae | Heliconiinae  | Boloria eunomia           | Esper            | Ernst Jung                        | Germany        | Bavaria    | Oberbayern                           | Ostallgae                                  | Zellwies, Lamerdingen, Kleinkitzhohle    | 48,0772018I  | 10,7695999I  |

|                  |     |           |                |                |                       |              |                                |             |             |                  |                                     |                                |                                                    |             |               |
|------------------|-----|-----------|----------------|----------------|-----------------------|--------------|--------------------------------|-------------|-------------|------------------|-------------------------------------|--------------------------------|----------------------------------------------------|-------------|---------------|
| BC ZSM Lep 5312' | 658 | JX034619  | Nymphalidae    | Heliconiinae   | Boloria eunomia       | Esper        | Ernst Jung                     | 10-Jun-2004 | Germany     | Bavaria          | Schwaber                            | Ostallgae                      | Lamerdingen, Kleinkitzhohle                        | 48,07720184 | 10,76959991   |
| MM13982          | 658 | HM875823  | Nymphalidae    | Heliconiinae   | Boloria eunomia       | Esper        | Marko Mutanen                  | 11-Jun-2009 | Finland     |                  | Ostrobotnia borealis pars australis |                                | Kempele                                            | 64,8809967  | 25,58600044   |
| MM13983          | 658 | HM875824  | Nymphalidae    | Heliconiinae   | Boloria eunomia       | Esper        | Marko Mutanen                  | 11-Jun-2009 | Finland     |                  | Ostrobotnia borealis pars australis |                                | Kempele                                            | 64,8809967  | 25,58600044   |
| MM17169          | 658 | JF853660  | Nymphalidae    | Heliconiinae   | Boloria eunomia       | Esper        | Marko Mutanen                  | 01-Jan-2005 | Finland     |                  | Ostrobotnia borealis pars australis |                                | Kiminki                                            | 64,98100281 | 25,72900009   |
| MM03407          | 658 | HQ2570285 | Nymphalidae    | Heliconiinae   | Boloria napaea        | Hoffmannsegg | Marko Mutanen                  |             | Finland     | Lappi            | Lapponia enontekiensi               |                                | Enontekiö                                          | 68,9970016E | 20,7439994E   |
| MM0410C          | 658 | HM38689C  | Nymphalidae    | Heliconiinae   | Boloria napaea        | Hoffmannsegg | Marko Mutanen                  |             | Finland     |                  | Lapponia enontekiensi               |                                | Enontekiö                                          | 68,9970016E | 20,7439994E   |
| MM1716E          | 658 | JN272537  | Nymphalidae    | Heliconiinae   | Boloria napaea        | Hoffmannsegg | Tomi Mutanen                   | 02-Jul-2003 | Finland     |                  | Lapponia enontekiensi               |                                | Enontekiö                                          | 69,04560098 | 20,85540006   |
| TLMF Lep 0183'   | 658 | HQ296330K | Nymphalidae    | Heliconiinae   | Boloria napaea        | Hoffmannsegg | Mayr T.                        | 11-Jul-2005 | Switzerland | Graubunder       |                                     |                                | Val Bever, Alp Surett                              | 46,5498992E | 9,78332996E   |
| TLMF Lep 0183'   | 658 | HQ296330I | Nymphalidae    | Heliconiinae   | Boloria napaea        | Hoffmannsegg | Mayr T.                        | 01-Aug-2005 | Switzerland | Graubunder       |                                     |                                | Val Bever, Alp Surett                              | 46,5498992E | 9,78332996E   |
| TLMF Lep 0183'   | 658 | HQ296330J | Nymphalidae    | Heliconiinae   | Boloria napaea        | Hoffmannsegg | Mayr T.                        | 11-Jul-2006 | Switzerland | Graubunder       |                                     |                                | Val Bever, Alp Surett                              | 46,5498992E | 9,78332996E   |
| BC ZSM Lep 2189E | 658 | JF415688  | Nymphalidae    | Heliconiinae   | Boloria thore         | Hübner       | Buchsbaum                      | 17-Jul-1999 | Germany     | Bavaria          | Oberbayern                          |                                | Wettersteingebirge, Kreuzeck-Stuibensee            | 47,45280075 | 11,0685997    |
| BC ZSM Lep 2712' | 658 | HM39182C  | Nymphalidae    | Heliconiinae   | Boloria thore         | Hübner       | Dr. Andreas H. Segerer         | 18-Jun-1996 | Germany     | Bavaria          | Oberbayern                          | Traunsteir                     | Ruhpolding, Eschelmoos                             | 47,72801073 | 12,559399E    |
| BC ZSM Lep 3054' | 658 | GU68947C  | Nymphalidae    | Heliconiinae   | Boloria thore         | Hübner       | E. Albert                      | 13-Jun-2009 | Germany     | Bavaria          |                                     |                                | Laubau                                             | 47,71120071 | 12,65620041   |
| BC ZSM Lep 5041' | 658 | JX034684  | Nymphalidae    | Heliconiinae   | Boloria thore         | Hübner       | Alfred Haslberger              | 01-Jul-2006 | Germany     | Bavaria          | Schwaber                            |                                | Oberstdorf, Oyta                                   | 47,3894996E | 10,3199996E   |
| MM0340E          | 658 | HQ257028E | Nymphalidae    | Heliconiinae   | Boloria thore         | Hübner       | Marko Mutanen                  |             | Finland     | Lappi            | Lapponia enontekiensi               |                                | Enontekiö                                          | 68,9970016E | 20,7439994E   |
| MM0409C          | 627 | HM38688C  | Nymphalidae    | Heliconiinae   | Boloria thore         | Hübner       | Marko Mutanen                  |             | Finland     |                  |                                     |                                | Enontekiö                                          | 68,9970016E | 20,7439994E   |
| MM0409A          | 658 | HM38688A  | Nymphalidae    | Heliconiinae   | Boloria thore         | Hübner       | Marko Mutanen                  |             | Finland     |                  |                                     |                                | Enontekiö                                          | 68,9970016E | 20,7439994E   |
| TLMF Lep 01092   | 603 | JX034685  | Nymphalidae    | Heliconiinae   | Boloria thore         | Hübner       | Aistleitner U.                 | 02-Jul-2009 | Switzerland | Graubunden       |                                     |                                | Tiefenastel S/ Salouf, Got Grond                   | 46,65001513 | 9,597000122   |
| TLMF Lep 0183'   | 658 | HQ296829C | Nymphalidae    | Heliconiinae   | Boloria thore         | Hübner       | Mayr T.                        | 14-Jun-2009 | Switzerland | Graubunder       |                                     |                                | Chr. Pagig                                         | 46,83330154 | 9,63330304E   |
| TLMF Lep 0183'   | 658 | HQ296829A | Nymphalidae    | Heliconiinae   | Boloria thore         | Hübner       | Mayr T.                        | 05-Jul-2006 | Switzerland | Sankt Gallen     |                                     |                                | Alt St. Johann, Gemeinewie                         | 47,21670151 | 9,25          |
| TLMF Lep 0183'   | 658 | HQ296829E | Nymphalidae    | Heliconiinae   | Boloria thore         | Hübner       | Mayr T.                        | 05-Jul-2006 | Switzerland | Sankt Gallen     |                                     |                                | Alt St. Johann, Gemeinewie                         | 47,21670151 | 9,25          |
| TLMF Lep 0272'   | 658 | JF860244  | Nymphalidae    | Heliconiinae   | Boloria thore         | Hübner       | Schmid J.                      | 05-Jul-2006 | Switzerland | Graubunder       |                                     |                                | Riefwald/ Valt                                     | 46,61800003 | 9,19400024E   |
| MM08052          | 658 | HM873750  | Gelechiidae    | Gelechiinae    | Bryotropha boreella   | Douglas      | Marko Mutanen, Panu Vaelimaeki |             | Finland     |                  | Lapponia kemensis pars occidentalis |                                | Kolari                                             | 67,27600098 | 23,75300066   |
| MM15622          | 658 | HM876411  | Gelechiidae    | Gelechiinae    | Bryotropha boreella   | Douglas      | Marko Mutanen                  | 14-Jul-2004 | Finland     |                  | Ostrobotnia borealis pars australis |                                | Kiminki                                            | 65,07099915 | 25,72500038   |
| MM15623          | 658 | HM876412  | Gelechiidae    | Gelechiinae    | Bryotropha boreella   | Douglas      | Marko Mutanen                  |             | Finland     |                  | Regio kuusamoensis                  |                                | Kuusamc                                            | 66,3160018E | 29,22999954   |
| TLMF Lep 0174'   | 658 | HQ296894E | Gelechiidae    | Gelechiinae    | Bryotropha boreella   | Douglas      | Huemer P                       | 11-Jun-2010 | Austria     | Steiermark       |                                     |                                | Woerschacher Moos N                                | 47,5581016E | 14,178299E    |
| TLMF Lep 0174'   | 658 | HQ296894F | Gelechiidae    | Gelechiinae    | Bryotropha boreella   | Douglas      | Huemer P                       | 11-Jun-2010 | Austria     | Steiermark       |                                     |                                | Woerschacher Moos N                                | 47,5581016E | 14,178299E    |
| TLMF Lep 0174'   | 658 | HQ296894G | Gelechiidae    | Gelechiinae    | Bryotropha boreella   | Douglas      | Huemer P                       | 11-Jun-2010 | Austria     | Steiermark       |                                     |                                | Woerschacher Moos N                                | 47,5581016E | 14,178299E    |
| TLMF Lep 0174'   | 658 | HQ296894H | Gelechiidae    | Gelechiinae    | Bryotropha boreella   | Douglas      | Huemer P                       | 11-Jun-2010 | Austria     | Steiermark       |                                     |                                | Woerschacher Moos N                                | 47,5581016E | 14,178299E    |
| CLV15101C        | 658 | JF855560  | Gracillariidae | Gracillariinae | Callisto coffeella    | Zetterstedt  | Helmut Deutsc                  | 17-Jun-2005 | Austria     |                  | Osttiro                             | Lienzer Dolomiten              | Lavanter Almtz                                     | 46,7747001E | 12,8538999E   |
| CLV1511          | 658 | JF855561  | Gracillariidae | Gracillariinae | Callisto coffeella    | Zetterstedt  | Helmut Deutsc                  | 17-Jun-2005 | Austria     |                  | Osttiro                             | Lienzer Dolomiten              | Lavanter Almtz                                     | 46,7747001E | 12,8538999E   |
| CLV1965          | 658 | JF848501  | Gracillariidae | Gracillariinae | Callisto coffeella    | Zetterstedt  | Stanislav Gombo                | 17-Jun-2005 | Austria     | Tyrol            | Osttiro                             | Lienzer Dolomiten              | Lavanter Almtz                                     | 46,7919998E | 12,8059997E   |
| MM08522          | 658 | HQ257036E | Gracillariidae | Gracillariinae | Callisto coffeella    | Zetterstedt  | Tomi Mutanen                   | 29-Jun-2003 | Finland     |                  | Lapponia enontekiensi               |                                | Enontekiö                                          | 68,9970016E | 20,7439994E   |
| MM08523          | 658 | HQ257036F | Gracillariidae | Gracillariinae | Callisto coffeella    | Zetterstedt  | Tomi Mutanen                   | 29-Jun-2003 | Finland     |                  | Lapponia enontekiensi               |                                | Enontekiö                                          | 68,9970016E | 20,7439994E   |
| MM08573          | 658 | HM873980  | Gracillariidae | Gracillariinae | Callisto coffeella    | Zetterstedt  | Marko Mutanen, Anttoni Mutanen | 14-Jun-2008 | Finland     |                  | Ostrobotnia borealis pars borealis  |                                | Rovaniemi                                          | 66,50499725 | 25,65200043   |
| MM18091          | 658 | JN271968  | Gracillariidae | Gracillariinae | Callisto coffeella    | Zetterstedt  | Tomi Mutanen                   | 06-Jul-2003 | Finland     |                  | Lapponia enontekiensi               |                                | Enontekiö                                          | 69,04560098 | 20,85540006   |
| TLMF Lep 0061'   | 647 | HM42598E  | Gracillariidae | Gracillariinae | Callisto coffeella    | Zetterstedt  | Huemer P                       | 20-Jul-2006 | Italy       |                  | Bellunc                             |                                | Passo di Valparola E                               | 46,5255012E | 11,9997997E   |
| TLMF Lep 0061'   | 658 | HM38145E  | Gracillariidae | Gracillariinae | Callisto coffeella    | Zetterstedt  | Huemer P                       | 20-Jul-2006 | Italy       |                  | Bellunc                             |                                | Passo di Valparola E                               | 46,5255012E | 11,9997997E   |
| TLMF Lep 0093'   | 658 | HQ296844A | Gracillariidae | Gracillariinae | Callisto coffeella    | Zetterstedt  | Huemer P                       | 26-Jun-1998 | Austria     | Vorarlberg       |                                     |                                | S-Schalgalal                                       | 47,06700134 | 9,76700019E   |
| TLMF Lep 0180'   | 658 | HQ2968271 | Gracillariidae | Gracillariinae | Callisto coffeella    | Zetterstedt  | Huemer P                       | 20-Jul-2006 | Italy       |                  | Bellunc                             |                                | Passo di Valparola E                               | 46,5255012E | 11,9997997E   |
| TLMF Lep 0180'   | 658 | HQ2968272 | Gracillariidae | Gracillariinae | Callisto coffeella    | Zetterstedt  | Huemer P                       | 20-Jul-2006 | Italy       |                  | Bellunc                             |                                | Passo di Valparola E                               | 46,5255012E | 11,9997997E   |
| TLMF Lep 0193'   | 658 | HQ296834A | Gracillariidae | Gracillariinae | Callisto coffeella    | Zetterstedt  | Huemer P                       | 08-Jul-2010 | Austria     | Vorarlberg       |                                     |                                | E Laguzalpe/ Manu                                  | 47,19329834 | 9,95333004    |
| TLMF Lep 0193'   | 658 | HQ296834B | Gracillariidae | Gracillariinae | Callisto coffeella    | Zetterstedt  | Huemer P                       | 08-Jul-2010 | Austria     | Vorarlberg       |                                     |                                | E Laguzalpe/ Manu                                  | 47,19329834 | 9,95333004    |
| TLMF Lep 0193'   | 658 | HQ296834C | Gracillariidae | Gracillariinae | Callisto coffeella    | Zetterstedt  | Huemer P                       | 08-Jul-2010 | Austria     | Vorarlberg       |                                     |                                | E Laguzalpe/ Manu                                  | 47,19329834 | 9,95333004    |
| TLMF Lep 0193'   | 658 | HQ296834D | Gracillariidae | Gracillariinae | Callisto coffeella    | Zetterstedt  | Huemer P                       | 08-Jul-2010 | Austria     | Vorarlberg       |                                     |                                | E Laguzalpe/ Manu                                  | 47,19329834 | 9,95333004    |
| TLMF Lep 0271'   | 658 | JF860237  | Gracillariidae | Gracillariinae | Callisto coffeella    | Zetterstedt  | Schmid J.                      | 24-May-2008 | Switzerland | Graubunder       |                                     |                                | Riefwald/ Valt                                     | 46,61800003 | 9,19400024E   |
| 06-PROBE-017E    | 650 | JX008262  | Geometridae    | Larentiinae    | Carsia sororiatz      | Hübner       | P.D.N. Heber                   |             | Canada      | Manitoba         | Churchill                           | 23 km E Churchill, Ramsay Cree | locality unconfirmer                               | 58,7379989E | -93,7799987E  |
| 06-PROBE-266E    | 651 | JX008256  | Geometridae    | Larentiinae    | Carsia sororiatz      | Hübner       | P.D.N. Heber                   | 16-Aug-2006 | Canada      | Manitoba         | Churchill                           | 22 km E Churchill, CNSC        |                                                    | 58,7379989E | -93,81900024E |
| MM0143E          | 658 | HM38672C  | Geometridae    | Larentiinae    | Carsia sororiatz      | Hübner       | Marko Mutanen, Panu Vaelimaeki |             | Finland     |                  |                                     |                                | Imatra                                             | 61,10800171 | 28,7989997E   |
| MM02919          | 658 | HM871743  | Geometridae    | Larentiinae    | Carsia sororiatz      | Hübner       | Marko Mutanen                  |             | Finland     |                  | Ostrobotnia borealis pars australis |                                | Kiminki                                            | 65,07099915 | 25,72500038   |
| MM08117          | 658 | HM873785  | Geometridae    | Larentiinae    | Carsia sororiatz      | Hübner       | Marko Mutanen, Panu Vaelimaeki |             | Finland     |                  | Lapponia kemensis pars occidentalis |                                | Kolari                                             | 67,27600098 | 23,75300026   |
| TLMF Lep 0271'   | 658 | JF860238  | Geometridae    | Larentiinae    | Carsia sororiatz      | Hübner       | Schmid J.                      | 02-Sep-2006 | Switzerland | Graubunder       |                                     |                                | Pl. Tschanneuff/ Ramosc                            | 46,8349990E | 10,375        |
| TLMF Lep 0279'   | 658 | JF860293  | Geometridae    | Larentiinae    | Carsia sororiatz      | Hübner       | Naessig W. & Weyh R.           | 17-Aug-2010 | Austria     | Tyrol            |                                     |                                | Kalm. A., Unterilliach, Winklertal                 | 46,8819992E | 12,6540002E   |
| MM17971          | 658 | JX034639  | Gelechiidae    | Gelechiinae    | Caryocolum petrophila | Preissecker  | Juhani Itäemies                |             | Finland     |                  |                                     |                                | Tammisar                                           | 59,8190002E | 23,2559994E   |
| MM17972          | 658 | JF854029  | Gelechiidae    | Gelechiinae    | Caryocolum petrophila | Preissecker  | Marko Mutanen                  | 29-Jul-2010 | Finland     |                  | Ostrobotnia borealis pars australis |                                | Oulunsalo                                          | 64,9936981E | 25,2196998E   |
| MM17973          | 658 | JF854030  | Gelechiidae    | Gelechiinae    | Caryocolum petrophila | Preissecker  | Marko Mutanen                  | 29-Jul-2010 | Finland     |                  | Ostrobotnia borealis pars australis |                                | Oulunsalo                                          | 64,9936981E | 25,2196998E   |
| TLMF Lep 0169'   | 658 | HQ296889E | Gelechiidae    | Gelechiinae    | Caryocolum petrophila | Preissecker  | Huemer P                       | 09-Aug-2010 | Slovenia    |                  |                                     |                                | Veliki Mangar                                      | 46,4384994E | 13,6352996E   |
| TLMF Lep 0169'   | 658 | HQ296890E | Gelechiidae    | Gelechiinae    | Caryocolum petrophila | Preissecker  | Huemer P                       | 09-Aug-2010 | Slovenia    |                  |                                     |                                | Veliki Mangar                                      | 46,4384994E | 13,6352996E   |
| TLMF Lep 0271'   | 658 | JF860239  | Gelechiidae    | Gelechiinae    | Caryocolum petrophila | Preissecker  | Schmid J.                      | 21-Jul-2006 | Switzerland | Graubunder       |                                     |                                | Crot/ Avers                                        | 46,4770011E | 9,48400020E   |
| TLMF Lep 05269   | 658 | JX034690  | Gelechiidae    | Gelechiinae    | Caryocolum petrophila | Preissecker  | Huemer P. & Tarmann G. M.      | 28-Jul-2011 | Macedonia   |                  |                                     |                                | Mavrovo NP, Korab, Korabska jezera, Kobolino polje | 41,7779998E | 20,58200073   |
| MM1564E          | 658 | HM87643E  | Gelechiidae    | Gelechiinae    | Caryocolum petry      | O. Hofmann   | Timo Nupponen, Kari Nupponen   |             | Finland     |                  | Satakunda                           |                                | Saekylae                                           | 60,9599900E | 22,3829994E   |
| MM1739E          | 658 | JF853815  | Gelechiidae    | Gelechiinae    | Caryocolum petry      | O. Hofmann   | Juhani Itäemies, Arja Itäemie  | 24-Jun-2004 | Finland     |                  | Satakunda                           |                                | Saekylae                                           | 61,0419998E | 22,4270000E   |
| MM1740C          | 658 | JF853816  | Gelechiidae    | Gelechiinae    | Caryocolum petry      | O. Hofmann   | Juhani Itäemies, Arja Itäemie  | 24-Jun-2004 | Finland     |                  | Satakunda                           |                                | Saekylae                                           | 61,0419998E | 22,4270000E   |
| TLMF Lep 0169'   | 658 | HQ296890I | Gelechiidae    | Gelechiinae    | Caryocolum petry      | O. Hofmann   | Huemer P                       | 09-Aug-2010 | Slovenia    |                  |                                     |                                | Veliki Mangar                                      | 46,4384994E | 13,6352996E   |
| TLMF Lep 0190'   | 658 | HQ296832E | Gelechiidae    | Gelechiinae    | Caryocolum petry      | O. Hofmann   | Erlebach S.                    | 14-Jul-1997 | Austria     | Karnten          |                                     |                                | W Goessnitzbrette                                  | 41,7779998E | 20,58200073   |
| TLMF Lep 0191'   | 658 | JF859623  | Gelechiidae    | Gelechiinae    | Caryocolum petry      | O. Hofmann   | Erlebach S.                    | 14-Jul-1997 | Austria     | Karnten          |                                     |                                | W Goessnitzbrette                                  | 41,7779998E | 20,58200073   |
| TLMF Lep 0191'   | 658 | HQ296832E | Gelechiidae    | Gelechiinae    | Caryocolum petry      | O. Hofmann   | Erlebach S.                    | 14-Jul-1997 | Austria     | Karnten          |                                     |                                | W Goessnitzbrette                                  | 41,7779998E | 20,58200073   |
| TLMF Lep 0271'   | 658 | JF860240  | Gelechiidae    | Gelechiinae    | Caryocolum petry      | O. Hofmann   | Schmid J.                      | 30-Jun-2009 | Switzerland | Graubunder       |                                     |                                | Riefwald/ Valt                                     | 46,61800003 | 9,19400024E   |
| 08-JDVBC-0080    | 658 | HQ008271  | Gelechiidae    | Gelechiinae    | Caryocolum pullatelli | Tengström    | déVaard, J.R.                  | 05-Jun-2008 | Canada      | British Columbia | Winfield                            | Beaver                         |                                                    |             |               |

|                |     |          |             |             |                         |                  |                                                                 |             |               |                  |                                      |                                                  |                          |               |              |
|----------------|-----|----------|-------------|-------------|-------------------------|------------------|-----------------------------------------------------------------|-------------|---------------|------------------|--------------------------------------|--------------------------------------------------|--------------------------|---------------|--------------|
| CNCLPE0002530  | 658 | JX008251 | Gelechiidae | Gelechiinae | Caryocolum pullatella   | Tengström        | JF Landry & L Humblé                                            | 01-Jun-2006 | Canada        | British Columbia |                                      | 4.5 km NE Kelowna;                               | Beaver Lake Rr           | 50,0359992    | -119,348996  |
| CNCLPE0002530  | 655 | JX008333 | Gelechiidae | Gelechiinae | Caryocolum pullatella   | Tengström        | JF Landry & L Humblé                                            | 01-Jun-2006 | Canada        | British Columbia |                                      | 4.5 km NE Kelowna;                               | Beaver Lake Rr           | 50,0359992    | -119,348996  |
| CNCLPE0002530  | 658 | JX008299 | Gelechiidae | Gelechiinae | Caryocolum pullatella   | Tengström        | JF Landry & L Humblé                                            | 01-Jun-2006 | Canada        | British Columbia |                                      | 4.5 km NE Kelowna;                               | Beaver Lake Rr           | 50,0359992    | -119,348996  |
| MDOK-1694      | 658 | GU800795 | Gelechiidae | Gelechiinae | Caryocolum pullatella   | Tengström        | Mark Dreiling                                                   | 22-Oct-2008 | United States | Oklahoma         |                                      | Bartlesvilk                                      | 1301 Cherokee Hills Driv | 36,74000166   | -95,94999696 |
| MDOK-2245      | 602 | GU803044 | Gelechiidae | Gelechiinae | Caryocolum pullatella   | Tengström        | Mark Dreiling                                                   | 08-May-2008 | United States | Oklahoma         |                                      | Bartlesvilk                                      | 1301 Cherokee Hills Driv | 36,74000166   | -95,94999696 |
| MDOK-2537      | 658 | GU801316 | Gelechiidae | Gelechiinae | Caryocolum pullatella   | Tengström        | Mark Dreiling                                                   | 04-Jun-2008 | United States | Oklahoma         |                                      | Bartlesvilk                                      | 1301 Cherokee Hills Driv | 36,74000166   | -95,94999696 |
| MDOK-4041      | 658 | JF857861 | Gelechiidae | Gelechiinae | Caryocolum pullatella   | Tengström        | Mark Dreiling                                                   | 06-Jun-2010 | United States | Oklahoma         |                                      | Bartlesvilk                                      | 1301 Cherokee Hills Driv | 36,74000166   | -95,94999696 |
| MM00778        | 658 | HM871187 | Gelechiidae | Gelechiinae | Caryocolum pullatella   | Tengström        | Marko Mutanen                                                   |             | Finland       |                  | Ostrobothnia borealis pars australis | Kiminki                                          | 65,07099915              | 25,72500038   |              |
| MM03085        | 658 | HM871813 | Gelechiidae | Gelechiinae | Caryocolum pullatella   | Tengström        | Marko Mutanen                                                   |             | Finland       |                  | Ostrobothnia borealis pars australis | Kiminki                                          | 65,07099915              | 25,72500038   |              |
| MM09055        | 658 | HM874155 | Gelechiidae | Gelechiinae | Caryocolum pullatella   | Tengström        | Marko Mutanen, Panu Vaelimael                                   |             | Finland       |                  | Karelia ladogensis                   | Simple                                           | 61,42300034              | 29,32299996   |              |
| MM14646        | 658 | HM876200 | Gelechiidae | Gelechiinae | Caryocolum pullatella   | Tengström        | Marko Mutanen, Nestori Mutanen, Anttoni Mutanen                 | 27-Jul-2009 | Finland       |                  | Ostrobothnia borealis pars australis | Kiminki                                          | 65,07099915              | 25,72500038   |              |
| SL0358         | 658 | HM902807 | Gelechiidae | Gelechiinae | Caryocolum pullatella   | Tengström        | S. Lee                                                          | 04-Aug-2008 | United States | Arkansas         | Conway Co.                           | Petit Jean St. Pk                                | 35,1189003               | -92,93440247  |              |
| TLMF Lep 02876 | 658 | JF860338 | Gelechiidae | Gelechiinae | Caryocolum pullatella   | Tengström        | Baldizzone G.                                                   | 20-Jul-2006 | Italy         |                  | Aosta                                | Champorcher, Dondena sent. Mt.                   | 45,60300064              | 7,506000042   |              |
| TLMF Lep 05272 | 658 | JX034621 | Gelechiidae | Gelechiinae | Caryocolum pullatella   | Tengström        | Huemer P. & Tarmann G. M.                                       | 28-Jul-2011 | Macedonia     |                  |                                      | Rascias                                          | 41,77799988              | 20,58200073   |              |
| TLMF Lep 05273 | 658 | JX034655 | Gelechiidae | Gelechiinae | Caryocolum pullatella   | Tengström        | Huemer P. & Tarmann G. M.                                       | 28-Jul-2011 | Macedonia     |                  |                                      | Mavrovo NP, Korab, Korabska jezera, Kobolino pok | 41,77799988              | 20,58200073   |              |
| TLMF Lep 05276 | 658 | JX034697 | Gelechiidae | Gelechiinae | Caryocolum pullatella   | Tengström        | Huemer P. & Tarmann G. M.                                       | 28-Jul-2011 | Macedonia     |                  |                                      | Mavrovo NP, Korab, Korabska jezera, Kobolino pok | 41,77799988              | 20,58200073   |              |
| MM00077        | 658 | HM396356 | Crambidae   | Crambinae   | Catoptria furcattella   | Zetterstedt      | Marko Mutanen                                                   |             | Finland       |                  |                                      | Enontekiö                                        | 68,99700166              | 20,74399944   |              |
| MM14585        | 658 | HM876174 | Crambidae   | Crambinae   | Catoptria furcattella   | Zetterstedt      | Marko Mutanen                                                   |             | Finland       |                  |                                      | Enontekiö                                        | 69,06300355              | 21,10199822   |              |
| MM18392        | 658 | JN266125 | Crambidae   | Crambinae   | Catoptria furcattella   | Zetterstedt      | Marko Mutanen, Nestori Mutanen, Anttoni Mutanen                 | 10-Jul-2010 | Finland       |                  |                                      | Lapponia enontekiensis                           | Utsjoki                  | 69,82800293   | 27           |
| TLMF Lep 02715 | 658 | JN266133 | Crambidae   | Crambinae   | Catoptria furcattella   | Zetterstedt      | Schmid J.                                                       | 25-Jul-2009 | Switzerland   | Graubunden       |                                      | Umg. Piz Minschuns, V. Costainas                 | 46,57920074              | 10,48330021   |              |
| TLMF Lep 0285  | 658 | JF860332 | Crambidae   | Crambinae   | Catoptria furcattella   | Zetterstedt      | Tarmann G                                                       | 10-Aug-1996 | Austria       |                  | Ostiro                               | Westlicher Sattelkopf/ Lienz NW                  | 46,90000155              | 12,76299985   |              |
| TLMF Lep 02851 | 658 | JF860333 | Crambidae   | Crambinae   | Catoptria furcattella   | Zetterstedt      | Tarmann G                                                       | 10-Aug-1996 | Austria       |                  | Ostiro                               | Westlicher Sattelkopf/ Lienz NW                  | 46,90000155              | 12,76299985   |              |
| MM02575        | 658 | HM871611 | Gelechiidae | Gelechiinae | Chionodes holosericella | Herrich-Schäffer | Marko Mutanen, Panu Vaelimael                                   |             | Finland       |                  |                                      | Imatra                                           | 61,10800171              | 28,79899976   |              |
| MM08090        | 658 | HM873774 | Gelechiidae | Gelechiinae | Chionodes holosericella | Herrich-Schäffer | Marko Mutanen, Panu Vaelimael                                   |             | Finland       |                  |                                      | Lapponia kemensis pars occidentalis              | Kolari                   | 67,27600098   | 23,75300026  |
| MM10386        | 658 | HM874686 | Gelechiidae | Gelechiinae | Chionodes holosericella | Herrich-Schäffer | family Marko Mutanen                                            | 22-Jul-2008 | Finland       | Aland            |                                      | Eckeröe                                          | 60,24000166              | 19,58900027   |              |
| TLMF Lep 0191; | 658 | JF859624 | Gelechiidae | Gelechiinae | Chionodes holosericella | Herrich-Schäffer | Huemer P                                                        | 30-Jul-1999 | Austria       |                  | Vorarlberg                           | Brandnerta                                       | 47,0727005               | 9,75          |              |
| TLMF Lep 0191; | 658 | JF859625 | Gelechiidae | Gelechiinae | Chionodes holosericella | Herrich-Schäffer | Huemer P                                                        | 29-Jun-1999 | Austria       |                  | Vorarlberg                           | Brandnerta                                       | 47,11970135              | 9,756110191   |              |
| TLMF Lep 0191; | 658 | JF859626 | Gelechiidae | Gelechiinae | Chionodes holosericella | Herrich-Schäffer | Huemer P. & Eriebach S                                          | 04-Aug-1995 | Austria       | Karnten          |                                      | Umg. St. Jakob im Les                            | 46,71670151              | 12,93330002   |              |
| TLMF Lep 01915 | 658 | HQ968327 | Gelechiidae | Gelechiinae | Chionodes holosericella | Herrich-Schäffer | Huemer P.                                                       | 16-Jul-2009 | Austria       |                  | Vorarlberg                           | Marul, Lagutzbach, Beim alten Stadel             | 47,20220184              | 9,928059578   |              |
| TLMF Lep 01916 | 658 | HQ968328 | Gelechiidae | Gelechiinae | Chionodes holosericella | Herrich-Schäffer | Huemer P.                                                       | 07-Aug-2009 | Austria       |                  | Vorarlberg                           | Sonntag, Buchboden, NNE Untere Alpschellaalp     | 47,2378006               | 10,03030014   |              |
| MM00693        | 658 | HM871135 | Gelechiidae | Gelechiinae | Chionodes luctuella     | Hübner           | Tomi Mutanen                                                    | 10-Jul-2006 | Finland       |                  |                                      | Ostrobothnia borealis pars borealis              | Ranua                    | 65,88200378   | 26,34199905  |
| MM09778        | 658 | HM387036 | Gelechiidae | Gelechiinae | Chionodes luctuella     | Hübner           | Marko Mutanen, Meelika Mutanen, Aatsale Mutanen, Sylvia Mutanen | 18-Jul-2008 | Finland       |                  |                                      | Eckeröe                                          | 60,27500153              | 19,57999992   |              |
| MM10155        | 658 | HM874598 | Gelechiidae | Gelechiinae | Chionodes luctuella     | Hübner           | Marko Mutanen, Nestori Mutanen, Anttoni Mutanen, Tomi Mutanen   | 28-Jul-2008 | Finland       |                  |                                      | Ostrobothnia borealis pars australis             | Oulu                     | 64,97699738   | 25,30599976  |
| TLMF Lep 0190; | 658 | HQ968325 | Gelechiidae | Gelechiinae | Chionodes luctuella     | Hübner           | Huemer P                                                        | 29-Jun-1999 | Austria       |                  | Vorarlberg                           | Brandnerta                                       | 47,11970135              | 9,756110191   |              |
| TLMF Lep 0190; | 631 | HQ968324 | Gelechiidae | Gelechiinae | Chionodes luctuella     | Hübner           | Huemer P                                                        | 29-Jun-1999 | Austria       |                  | Vorarlberg                           | Brandnerta                                       | 47,11970135              | 9,756110191   |              |
| 08BBLEP-02431  | 658 | JX008122 | Gelechiidae | Gelechiinae | Chionodes lugubrella    | Fabricius        | J.Straka,J.Cossey                                               | 26-Jul-2008 | Canada        | Alberta          | Waterton                             | Waterton Lakes Nat. Park - Maskinonge Lak        | 49,11000061              | -113,8399963  |              |
| 08BBLEP-02504  | 658 | JX008466 | Gelechiidae | Gelechiinae | Chionodes lugubrella    | Fabricius        | J.Straka,J.Cossey                                               | 28-Jul-2008 | Canada        | Alberta          | Banff                                | Banff Nat. Park - Tunnel Mountain Campground     | 51,19300079              | -115,5329971  |              |
| 08BBLEP-02853  | 658 | JX008193 | Gelechiidae | Gelechiinae | Chionodes lugubrella    | Fabricius        | J.Straka,J.Cossey                                               | 25-Jul-2008 | Canada        | Alberta          | Waterton                             | Waterton Lakes Nat. Park - Carthew Creek         | 49,04899979              | -113,913002   |              |
| 08BBLEP-03171  | 597 | JX008390 | Gelechiidae | Gelechiinae | Chionodes lugubrella    | Fabricius        | J.Straka,J.Cossey                                               | 06-Aug-2008 | Canada        | Alberta          | Waterton                             | Waterton Lakes Nat. Park - Blakiston Creel       | 49,07799911              | -113,88200038 |              |
| 08BBLEP-03249  | 658 | JX008456 | Gelechiidae | Gelechiinae | Chionodes lugubrella    | Fabricius        | J.Straka,J.Cossey                                               | 08-Aug-2008 | Canada        | Alberta          | Waterton                             | Waterton Lakes Nat. Park - Coppemine Creek       | 49,10499954              | -113,9589996  |              |
| CNCLPE00061411 | 658 | GU693344 | Gelechiidae | Gelechiinae | Chionodes lugubrella    | Fabricius        | B.C. Schmidt                                                    | 23-Jun-2004 | Canada        | Yukon Territory  |                                      | 2 km N Carcross                                  | 60,18799977              | -134,6959991  |              |
| CNCLPE00061411 | 658 | GU693341 | Gelechiidae | Gelechiinae | Chionodes lugubrella    | Fabricius        | B.C. Schmidt                                                    | 23-Jun-2004 | Canada        | Yukon Territory  |                                      | 2 km N Carcross                                  | Sand dunes               | 60,18799977   | -134,6959991 |
| MM03079        | 615 | HM871810 | Gelechiidae | Gelechiinae | Chionodes lugubrella    | Fabricius        | Marko Mutanen                                                   |             | Finland       |                  | Ostrobothnia borealis pars australis | Kiminki                                          | 65,07099915              | 25,72500038   |              |
| MM03257        | 658 | HM871902 | Gelechiidae | Gelechiinae | Chionodes lugubrella    | Fabricius        | Marko Mutanen                                                   | 29-Jun-2006 | Finland       |                  | Oulun laani                          | Ostrobothnia borealis pars australis             | Kiminki                  | 65,07099915   | 25,72500038  |
| MM13505        | 658 | HM875628 | Gelechiidae | Gelechiinae | Chionodes lugubrella    | Fabricius        | Marko Mutanen, Panu Vaelimael                                   |             | Finland       |                  | Regio Aboensis                       | Dragsfjaerd                                      | 60,01100155              | 22,49799915   |              |
| NoA-08-250     | 587 | JX008421 | Gelechiidae | Gelechiinae | Chionodes lugubrella    | Fabricius        | D.A. Macaulay, G.R. Pohl, A.D. Roe                              | 06-Jul-2001 | Canada        | Alberta          |                                      | La Butte Ck Wildlands Prov Pk                    | 59,42699814              | -111,4440002  |              |
| NoA-08-251     | 658 | JX008150 | Gelechiidae | Gelechiinae | Chionodes lugubrella    | Fabricius        | D.A. Macaulay                                                   | 22-Jun-2002 | Canada        | Alberta          |                                      | Fr Assiniboine                                   | 55,30099865              | -114,82800025 |              |
| NoA-08-252     | 658 | JX008278 | Gelechiidae | Gelechiinae | Chionodes lugubrella    | Fabricius        | Fabricius                                                       | 15-Jul-2004 | Canada        | Alberta          |                                      | Birch Mtns Wildland Pk                           | 57,07099916              | -112,4499966  |              |
| NoA-08-253     | 658 | JX008334 | Gelechiidae | Gelechiinae | Chionodes lugubrella    | Fabricius        | Fabricius                                                       | 08-Jul-2004 | Canada        | Alberta          |                                      | Birch Mtns Wildland Pk                           | 57,58000181              | -112,46700025 |              |
| NoA-08-254     | 658 | JX008457 | Gelechiidae | Gelechiinae | Chionodes lugubrella    | Fabricius        | Fabricius                                                       | 25-Jul-2003 | Canada        | Alberta          |                                      | Red Lodge Prov Pk                                | 51,95000076              | -114,25       |              |
| TLMF Lep 01887 | 658 | HQ968315 | Gelechiidae | Gelechiinae | Chionodes lugubrella    | Fabricius        | Nel J.                                                          | 07-Jul-2004 | France        |                  | Provence-Alpes-Cote d'Azur           | Valle du Fournel                                 | 44,78200155              | 6,513000011   |              |
| TLMF Lep 01888 | 658 | HQ968316 | Gelechiidae | Gelechiinae | Chionodes lugubrella    | Fabricius        | Fabricius                                                       | 25-Jul-1992 | France        |                  | Auvergne                             | Saint-Christophe                                 | 45                       | 3,816669941   |              |
| TLMF Lep 0280; | 658 | JF860300 | Gelechiidae | Gelechiinae | Chionodes lugubrella    | Fabricius        | Huemer P                                                        | 11-Jun-2010 | Austria       |                  | Steiermark                           | Weersbacher Moos N                               | 67,57999866              | 14,17800046   |              |
| MM00086        | 658 | HM396366 | Gelechiidae | Gelechiinae | Chionodes viduella      | Fabricius        | Marko Mutanen                                                   |             | Finland       |                  |                                      | Lapponia enontekiensis                           | 68,99700166              | 20,74399944   |              |
| MM03435        | 658 | JX034603 | Gelechiidae | Gelechiinae | Chionodes viduella      | Fabricius        | Marko Mutanen                                                   |             | Finland       |                  |                                      | Enontekiö                                        | 68,99700166              | 20,74399944   |              |
| MM03893        | 658 | HM872205 | Gelechiidae | Gelechiinae | Chionodes viduella      | Fabricius        | Marko Mutanen                                                   |             | Finland       |                  |                                      | Kesaelaht                                        | 61,73299922              | 29,71100044   |              |
| MM04153        | 658 | HM386944 | Gelechiidae | Gelechiinae | Chionodes viduella      | Fabricius        | Marko Mutanen                                                   |             | Finland       |                  |                                      | Enontekiö                                        | 68,99700166              | 20,74399944   |              |
| MM06284        | 658 | HM873171 | Gelechiidae | Gelechiinae | Chionodes viduella      | Fabricius        | Marko Mutanen, Nestori Mutanen, Anttoni Mutanen                 | 27-Jun-2007 | Finland       |                  |                                      | Lapponia kemensis pars orientalis                | Sodankylae               | 68,22299957   | 27,21699905  |
| TLMF Lep 01894 | 658 | JX034574 | Gelechiidae | Gelechiinae | Chionodes viduella      | Fabricius        | Nel J.                                                          | 21-Jul-1995 | France        |                  | Provence-Alpes-Cote d'Azur           | Col du Galibier                                  | 45,06420135              | 6,391940117   |              |
| TLMF Lep 01895 | 658 | JF859620 | Gelechiidae | Gelechiinae | Chionodes viduella      | Fabricius        | Deutsch H.                                                      | 19-Jun-2000 | Austria       | Tyrol            | Osttirol, Lienzer Dolomiten          | Lavanter Almtal/ Nikolsdorf SW                   | 46,76890182              | 12,84889984   |              |

21013JN

3544JN

MIC5790 V



|                                                                                                                                                    |                                                                           |                                                                                                                      |                                                                                                                                                                   |                                                                                                                                    |                                                                                                                                                                                                                      |                                                                                                                                                      |                                                                                                                               |                                                                                                       |                                                                                                           |                                                                                                         |                                                                                                  |                                                                                                                                                                                                                     |                                                                                                                                           |                                                                                                                                                    |
|----------------------------------------------------------------------------------------------------------------------------------------------------|---------------------------------------------------------------------------|----------------------------------------------------------------------------------------------------------------------|-------------------------------------------------------------------------------------------------------------------------------------------------------------------|------------------------------------------------------------------------------------------------------------------------------------|----------------------------------------------------------------------------------------------------------------------------------------------------------------------------------------------------------------------|------------------------------------------------------------------------------------------------------------------------------------------------------|-------------------------------------------------------------------------------------------------------------------------------|-------------------------------------------------------------------------------------------------------|-----------------------------------------------------------------------------------------------------------|---------------------------------------------------------------------------------------------------------|--------------------------------------------------------------------------------------------------|---------------------------------------------------------------------------------------------------------------------------------------------------------------------------------------------------------------------|-------------------------------------------------------------------------------------------------------------------------------------------|----------------------------------------------------------------------------------------------------------------------------------------------------|
| MDH00575:<br>MM03227                                                                                                                               | 658<br>658                                                                | JX008462<br>HM871887                                                                                                 | Crambidae<br>Crambidae                                                                                                                                            | Crambinae<br>Crambinae                                                                                                             | Crambus alienellus<br>Crambus alienellus                                                                                                                                                                             | Germar & Kaufuss<br>Germar & Kaufuss                                                                                                                 | D.Handfield<br>Marko Mutanen                                                                                                  | 09-Jul-2006<br>29-Jun-2006                                                                            | Canada<br>Finland                                                                                         | Quebec<br>Oulun laani                                                                                   | Saint-Henri-de-Tailloir<br>Ostrobothnia borealis pars<br>australis                               | Parc de la Pointe-Tailloir<br>Kiminki                                                                                                                                                                               | 49,24169922<br>65,07099915                                                                                                                | -72,42299652<br>25,72500038                                                                                                                        |
| MM04226<br>MM14025<br>TLMF Lep 02839                                                                                                               | 658<br>658<br>658                                                         | HM872344<br>HM875841<br>JF860321                                                                                     | Crambidae<br>Crambidae<br>Crambidae                                                                                                                               | Crambinae<br>Crambinae<br>Crambinae                                                                                                | Crambus alienellus<br>Crambus alienellus<br>Crambus alienellus                                                                                                                                                       | Germar & Kaufuss<br>Germar & Kaufuss<br>Germar & Kaufuss                                                                                             | Marko Mutaner<br>Marko Mutaner<br>Huemer P.                                                                                   |                                                                                                       | Finland<br>Finland<br>Austria                                                                             | Ita-Suomen Laan<br>Karelia borealis<br>Nordtirol, Kaisergebirge                                         | Karelia borealis<br>Nordtirol, Kaisergebirge                                                     | Kesalahti<br>Tuupovaara<br>Walchsee NW - Schwemm N-Teil                                                                                                                                                             | 61,79299921<br>62,375<br>47,65999985                                                                                                      | 29,71100044<br>20,05000066<br>12,30200005                                                                                                          |
| TLMF Lep 02840                                                                                                                                     | 658                                                                       | JF860322                                                                                                             | Crambidae                                                                                                                                                         | Crambinae                                                                                                                          | Crambus alienellus                                                                                                                                                                                                   | Germar & Kaufuss                                                                                                                                     | Huemer P.                                                                                                                     | 09-Jun-2006                                                                                           | Austria                                                                                                   | Nordtirol, Kaisergebirge                                                                                |                                                                                                  | Walchsee NW - Schwemm N-Teil                                                                                                                                                                                        | 47,65999985                                                                                                                               | 12,30200005                                                                                                                                        |
| MM02212<br>MM06123<br>MM18133                                                                                                                      | 633<br>658<br>658                                                         | HM871446<br>HM873056<br>JF854150                                                                                     | Elachistidae<br>Elachistidae<br>Elachistidae                                                                                                                      | Depressariinae<br>Depressariinae<br>Depressariinae                                                                                 | Depressaria leucocephala<br>Depressaria leucocephala<br>Depressaria leucocephala                                                                                                                                     | Snellen<br>Snellen<br>Snellen                                                                                                                        | Marko Mutanen, Panu Vaelimaei<br>Tommi Mutanen<br>Marko Mutanen                                                               |                                                                                                       | Finland<br>Finland<br>Finland                                                                             | Savonia australis<br>Regio Aboensis<br>Ostrobothnia borealis pars<br>australis                          | Imatra<br>Salo<br>Oulunsalo                                                                      | 61,10800171<br>60,26200104<br>64,99369812                                                                                                                                                                           | 28,79899976<br>23,02499962<br>25,21969986                                                                                                 |                                                                                                                                                    |
| TLMF Lep 0272:<br>TLMF Lep 02871<br>MM18563                                                                                                        | 658<br>658<br>658                                                         | JF860247<br>JF860336<br>JF853361                                                                                     | Elachistidae<br>Elachistidae<br>Elachistidae                                                                                                                      | Depressariinae<br>Depressariinae<br>Elachistinae                                                                                   | Depressaria leucocephala<br>Depressaria leucocephala<br>Elachista elsaei                                                                                                                                             | Snellen<br>Snellen<br>Traugott-Olsei                                                                                                                 | Schmid J.<br>Burmann K. & Huemer P<br>Ingvar Svenssor                                                                         | 28-Jun-2010<br>13-Aug-1988<br>01-May-1990                                                             | Switzerland<br>Austria<br>Sweden                                                                          | Graubunder<br>Tyrol<br>Sm                                                                               | Unterengadir<br>Nordtirol<br>Steinseeuhtettenweg/ Zams NV<br>Hoegsby                             | Lavin Umgebun<br>Steinseeuhtettenweg/ Zams NV<br>Imatra                                                                                                                                                             | 46,77000044<br>47,17599866                                                                                                                | 10,11100006<br>10,60400006                                                                                                                         |
| MM18596<br>TLMF Lep 0301:<br>MM02656<br>MM02651<br>MM03154                                                                                         | 658<br>658<br>658<br>658<br>658                                           | JF853374<br>JN267144<br>HM871665<br>HM871665<br>HM871842                                                             | Elachistidae<br>Elachistidae<br>Elachistidae<br>Elachistidae<br>Elachistidae                                                                                      | Elachistinae<br>Elachistinae<br>Elachistinae<br>Elachistinae<br>Elachistinae                                                       | Elachista elsaei<br>Elachista subalbidell:<br>Elachista subalbidell:<br>Elachista subalbidella                                                                                                                       | Traugott-Olsei<br>Schläger<br>Schläger<br>Schläger                                                                                                   | Bengt A, Bengtssor<br>Huemer P<br>Marko Mutanen, Panu Vaelimaei<br>Marko Mutanen, Panu Vaelimaei                              | 25-Jun-2010<br>14-Sep-2010                                                                            | Sweden<br>Finland<br>Finland<br>Finland                                                                   | Sm<br>South Tyro<br>Finland<br>Finland                                                                  | Eltsicht<br>Savonia australis<br>Savonia australis<br>Ostrobothnia borealis pars<br>australis    | Lenhovda, Varaskru<br>Montigg/ Kleiner Pric<br>Imatra<br>Imatra<br>Kiminki                                                                                                                                          | 46,42829896<br>61,10800171<br>61,10800171<br>65,07099915                                                                                  | 11,30000016<br>28,79899976<br>28,79899976<br>25,72500038                                                                                           |
| MM05332                                                                                                                                            | 572                                                                       | HM872775                                                                                                             | Elachistidae                                                                                                                                                      | Elachistinae                                                                                                                       | Elachista subalbidella                                                                                                                                                                                               | Schläger                                                                                                                                             | Marko Mutanen                                                                                                                 |                                                                                                       | Finland                                                                                                   | Lansi-Suomen<br>Laani                                                                                   | Regio Aboensis                                                                                   | Turku                                                                                                                                                                                                               | 60,44100189                                                                                                                               | 22,20199966                                                                                                                                        |
| MM05490                                                                                                                                            | 658                                                                       | HM872850                                                                                                             | Elachistidae                                                                                                                                                      | Elachistinae                                                                                                                       | Elachista subalbidella                                                                                                                                                                                               | Schläger                                                                                                                                             | Marko Mutanen                                                                                                                 | 06-Jun-2007                                                                                           | Finland                                                                                                   |                                                                                                         | Ostrobothnia borealis pars<br>australis                                                          | Kiminki                                                                                                                                                                                                             | 65,07099915                                                                                                                               | 25,72500038                                                                                                                                        |
| MM06221<br>MM08055                                                                                                                                 | 658<br>658                                                                | HM873121<br>HM873753                                                                                                 | Elachistidae<br>Elachistidae                                                                                                                                      | Elachistinae<br>Elachistinae                                                                                                       | Elachista subalbidell:<br>Elachista subalbidella                                                                                                                                                                     | Schläger<br>Schläger                                                                                                                                 | Marko Mutaner<br>Marko Mutanen, Panu Vaelimaei                                                                                | 19-Jun-2007                                                                                           | Finland<br>Finland                                                                                        |                                                                                                         | Karelia australis<br>Lapponia kemensis pars<br>occidentalis                                      | Joutseno<br>Kolari                                                                                                                                                                                                  | 61,05500031<br>67,27600098                                                                                                                | 22,72200121<br>23,75300026                                                                                                                         |
| MM09037<br>MM13727<br>MM14064<br>MM18154<br>TLMF Lep 02843                                                                                         | 658<br>658<br>658<br>658<br>658                                           | HM874156<br>HM875784<br>HM875871<br>JF854167<br>JF860325                                                             | Elachistidae<br>Elachistidae<br>Elachistidae<br>Elachistidae<br>Elachistidae                                                                                      | Elachistinae<br>Elachistinae<br>Elachistinae<br>Elachistinae<br>Elachistinae                                                       | Elachista subalbidell:<br>Elachista subalbidell:<br>Elachista subalbidell:<br>Elachista subalbidell:<br>Elachista subalbidella                                                                                       | Schläger<br>Schläger<br>Schläger<br>Schläger<br>Schläger                                                                                             | Marko Mutanen, Panu Vaelimaei<br>Marko Mutanen, Panu Vaelimaei<br>Marko Mutaner<br>Tommi Mutanen<br>Huemer P.                 |                                                                                                       | Finland<br>Finland<br>Finland<br>Finland<br>Austria                                                       |                                                                                                         | Karelia ladogensis<br>Regio Aboensis<br>Karelia borealis<br>Ostrobothnia kajanseni               | Simpele<br>Dragsfjard<br>Tuupovaara<br>Kajaan<br>Sonntag, Buchboden, E<br>Hintergurg<br>Sonntag, Buchboden, E<br>Hintergurg                                                                                         | 61,42300034<br>60,01100156<br>62,375<br>64,26750188<br>47,24900055                                                                        | 29,32299996<br>22,43799916<br>30,90500066<br>27,61899946<br>9,991000175                                                                            |
| TLMF Lep 02844                                                                                                                                     | 658                                                                       | JF860326                                                                                                             | Elachistidae                                                                                                                                                      | Elachistinae                                                                                                                       | Elachista subalbidella                                                                                                                                                                                               | Schläger                                                                                                                                             | Huemer P.                                                                                                                     | 15-Jun-2010                                                                                           | Austria                                                                                                   | Vorarlberg                                                                                              |                                                                                                  | Sonntag, Buchboden, E<br>Hintergurg                                                                                                                                                                                 | 47,24900055                                                                                                                               | 9,991000175                                                                                                                                        |
| MM02824                                                                                                                                            | 658                                                                       | HM871721                                                                                                             | Geometridae                                                                                                                                                       | Ennominae                                                                                                                          | Elophos vittaria                                                                                                                                                                                                     | Thunberg                                                                                                                                             | Marko Mutanen                                                                                                                 |                                                                                                       | Finland                                                                                                   |                                                                                                         | Ostrobothnia borealis pars<br>australis                                                          | Kiminki                                                                                                                                                                                                             | 65,07099915                                                                                                                               | 25,72500038                                                                                                                                        |
| MM04136<br>MM14085<br>TLMF Lep 00241<br>TLMF Lep 0241:<br>TLMF Lep 0248:<br>TLMF Lep 0272:<br>BC NP 0165<br>BC NP 0166<br>BC NP 0167<br>BC NP 0199 | 658<br>658<br>648<br>658<br>658<br>658<br>658<br>658<br>658<br>658<br>658 | HM38692:<br>HM875886<br>HM425756<br>JF859959<br>JF860022<br>JF860248<br>JX034674<br>JX034671<br>JX034638<br>JX034698 | Geometridae<br>Geometridae<br>Geometridae<br>Geometridae<br>Geometridae<br>Geometridae<br>Geometridae<br>Geometridae<br>Geometridae<br>Geometridae<br>Geometridae | Ennominae<br>Ennominae<br>Ennominae<br>Ennominae<br>Ennominae<br>Ennominae<br>Larentinae<br>Larentinae<br>Larentinae<br>Larentinae | Elophos vittaris<br>Elophos vittaris<br>Elophos vittaris<br>Elophos vittaris<br>Elophos vittaris<br>Elophos vittaris<br>Entephria nobiliaris<br>Entephria nobiliaris<br>Entephria nobiliaris<br>Entephria nobiliaris | Thunberg<br>Thunberg<br>Thunberg<br>Thunberg<br>Thunberg<br>Thunberg<br>Herrich-Schäffer<br>Herrich-Schäffer<br>Herrich-Schäffer<br>Herrich-Schäffer | Marko Mutaner<br>Marko Mutaner<br>Huemer P<br>Huemer P<br>Huemer P<br>Schmid J.<br>N. Poel<br>N. Poel<br>N. Poel<br>S. Ortner |                                                                                                       | Finland<br>Finland<br>Austria<br>Italy<br>Italy<br>Switzerland<br>Austria<br>Austria<br>Austria<br>France |                                                                                                         | Karelia borealis                                                                                 | Enontekiö<br>Tuupovaara<br>Petzen N, Obere Kirsch:<br>Ritten/ Obergruenwai<br>Ritten/ Obergruenwai<br>Riefawald/ Valt<br>Dorfertal, Spinewitro<br>Dorfertal, Spinewitro<br>Dorfertal, Spinewitro<br>Col du Galibier | 68,99700166<br>62,375<br>46,5060997<br>46,59700012<br>46,59700012<br>46,61800000<br>47,0890007<br>47,0890007<br>47,0890007<br>45,06000137 | 20,74399944<br>30,90500066<br>14,75699997<br>11,43900012<br>11,43900012<br>9,194000244<br>12,61699966<br>12,61699966<br>12,61699966<br>6,409999847 |
| BC NP 0286<br>BC ZSM Lep 11361<br>BC ZSM Lep 11361<br>BC ZSM Lep 11368                                                                             | 658<br>621<br>598<br>589                                                  | JX034604<br>JX034657<br>JX034618<br>JX034594                                                                         | Geometridae<br>Geometridae<br>Geometridae<br>Geometridae                                                                                                          | Larentinae<br>Larentinae<br>Larentinae<br>Larentinae                                                                               | Entephria nobiliaris<br>Entephria nobiliaris<br>Entephria nobiliaris<br>Entephria nobiliaris                                                                                                                         | Herrich-Schäffer<br>Herrich-Schäffer<br>Herrich-Schäffer<br>Herrich-Schäffer                                                                         | S. Ortner<br>Stanislav Gomboc<br>Stanislav Gomboc<br>Stanislav Gomboc                                                         | 10-Aug-2008<br>04-Aug-1997<br>04-Aug-1997<br>02-Aug-2002                                              | Austria<br>Slovenia<br>Slovenia<br>Slovenia                                                               |                                                                                                         |                                                                                                  | Soelden, Rettenbacherferne<br>Juliske Alpe, Mangart (ID=688<br>Juliske Alpe, Mangart (ID=688<br>Juliske Alpe, Kanin, okolica smuia<br>(ID=715)                                                                      | 46,91999817                                                                                                                               | 10,94999981                                                                                                                                        |
| BC ZSM Lep 11369                                                                                                                                   | 659                                                                       | JX034601                                                                                                             | Geometridae                                                                                                                                                       | Larentinae                                                                                                                         | Entephria nobiliaria                                                                                                                                                                                                 | Herrich-Schäffer                                                                                                                                     | Stanislav Gomboc                                                                                                              | 27-Jul-2006                                                                                           | Austria                                                                                                   | Karnten                                                                                                 |                                                                                                  | Karnten, Grossglockner Gebiet,<br>Wallackhaus (ID=9s589<br>Kaernten, Grossglockner Gebiet,<br>Wallackhaus (ID=9s589                                                                                                 |                                                                                                                                           |                                                                                                                                                    |
| BC ZSM Lep 11370                                                                                                                                   | 659                                                                       | JX034572                                                                                                             | Geometridae                                                                                                                                                       | Larentinae                                                                                                                         | Entephria nobiliaria                                                                                                                                                                                                 | Herrich-Schäffer                                                                                                                                     | Stanislav Gomboc                                                                                                              | 27-Jul-2006                                                                                           | Austria                                                                                                   | Karnten                                                                                                 |                                                                                                  | Karnten, Grossglockner Gebiet,<br>Wallackhaus (ID=9s589<br>Kaernten, Grossglockner Gebiet,<br>Wallackhaus (ID=9s589                                                                                                 |                                                                                                                                           |                                                                                                                                                    |
| BC ZSM Lep 21961<br>BC ZSM Lep 2646:<br>BC ZSM Lep 31853                                                                                           | 656<br>658<br>658                                                         | JX034599<br>GU855466<br>HQ957245                                                                                     | Geometridae<br>Geometridae<br>Geometridae                                                                                                                         | Larentinae<br>Larentinae<br>Larentinae                                                                                             | Entephria nobiliaris<br>Entephria nobiliaris<br>Entephria nobiliaria                                                                                                                                                 | Herrich-Schäffer<br>Herrich-Schäffer<br>Herrich-Schäffer                                                                                             | N. Zaher<br>K. Cerny<br>Dr. T. Gruenewald                                                                                     | 28-Jul-2008<br>23-Aug-2004<br>16-Aug-2002                                                             | Italy<br>Austria<br>France                                                                                | Abruzzi<br>Tyrol<br>Provence-Alpes-<br>Cote d'Azur                                                      | Hautes Alpes                                                                                     | Maiella<br>Serfaus                                                                                                                                                                                                  | 42,09019852<br>47,03850174<br>45,03499985                                                                                                 | 14,09020042<br>10,5692997<br>6,40500021                                                                                                            |
| BC ZSM Lep 3396:<br>BC ZSM Lep 3396:<br>BC ZSM Lep 3396:<br>BC ZSM Lep 3440:<br>MM1870C<br>MM18701<br>TLMF Lep 00368                               | 658<br>658<br>658<br>658<br>658<br>658<br>658                             | HM903300<br>HM903300<br>HM903300<br>HQ957856<br>JX034689<br>JN279420<br>HM425858                                     | Geometridae<br>Geometridae<br>Geometridae<br>Geometridae<br>Geometridae<br>Geometridae<br>Geometridae                                                             | Larentinae<br>Larentinae<br>Larentinae<br>Larentinae<br>Larentinae<br>Larentinae<br>Larentinae                                     | Entephria nobiliaris<br>Entephria nobiliaris<br>Entephria nobiliaris<br>Entephria nobiliaris<br>Entephria nobiliaris<br>Entephria nobiliaris<br>Entephria nobiliaria                                                 | Herrich-Schäffer<br>Herrich-Schäffer<br>Herrich-Schäffer<br>Herrich-Schäffer<br>Herrich-Schäffer<br>Herrich-Schäffer<br>Herrich-Schäffer             | H. Deutsch<br>H. Deutsch<br>H. Deutsch<br>P. Skou<br>Panu Vaelimaei<br>Panu Vaelimaei<br>Herrich-Schäffer                     | 02-Sep-2006<br>20-Aug-2005<br>11-Aug-2004<br>25-Jul-2006<br>11-Jul-2003<br>15-Jul-2001<br>01-Aug-2009 | Austria<br>Austria<br>Austria<br>Italy<br>Finland<br>Finland<br>Austria                                   |                                                                                                         | Ostiro<br>Ostiro<br>Karnten<br>Piedmon<br>Lapponia enontekiensi<br>Lapponia enontekiensi         | Lienzer Dolomter<br>Lienzer Dolomter<br>NP Hohe Tauern<br>Colle di Lombardi<br>Enontekiö<br>Enontekiö<br>Enontekiö<br>Enontekiö                                                                                     | 46,79550171<br>46,78720096<br>44,19919966<br>68,99659725<br>69,04560088<br>46,98939896                                                    | 12,83999002<br>12,80700016<br>Hochtor<br>17,41900106<br>20,74370000<br>20,85540006<br>13,26690006                                                  |
| TLMF Lep 02021<br>TLMF Lep 02721<br>MM0604E<br>MM14635<br>MM18327<br>TLMF Lep 00121                                                                | 658<br>658<br>658<br>658<br>658<br>407                                    | HQ968437<br>JF860249<br>HM873018<br>HM876198<br>JX034694<br>JX034700                                                 | Geometridae<br>Geometridae<br>Tortricidae<br>Tortricidae<br>Tortricidae<br>Tortricidae                                                                            | Larentinae<br>Larentinae<br>Olethreutinae<br>Olethreutinae<br>Olethreutinae<br>Olethreutinae                                       | Entephria nobiliaris<br>Entephria nobiliaris<br>Epinotia mercuriana<br>Epinotia mercuriana<br>Epinotia mercuriana<br>Epinotia mercuriana                                                                             | Herrich-Schäffer<br>Herrich-Schäffer<br>Frölich<br>Frölich<br>Frölich<br>Frölich                                                                     | Huemer P<br>Schmid J.<br>Tommi Mutaner<br>Marko Mutaner<br>Tommi Mutanen, Salla Mutane<br>Huemer P.                           | 12-Jul-2010<br>10-Jun-2007<br>09-Aug-2007<br>09-Aug-2007<br>03-Aug-2008                               | Italy<br>Switzerland<br>Finland<br>Finland<br>Finland<br>Italy                                            | Lazio<br>Graubunder<br>Lapponia enontekiensi<br>Lapponia enontekiensi<br>Lapponia enontekiensi<br>Cuneo | Rieti<br>Unterengadir<br>Lapponia enontekiensi<br>Lapponia enontekiensi<br>Lapponia enontekiensi | Arde<br>Monte Terminillo I<br>Ardez                                                                                                                                                                                 | 42,48329922<br>46,77399822                                                                                                                | 13<br>10,21000021                                                                                                                                  |
| TLMF Lep 00597<br>TLMF Lep 00789                                                                                                                   | 658<br>658                                                                | HM381437<br>HM426135                                                                                                 | Tortricidae<br>Tortricidae                                                                                                                                        | Olethreutinae<br>Olethreutinae                                                                                                     | Epinotia mercuriana<br>Epinotia mercuriana                                                                                                                                                                           | Frölich<br>Frölich                                                                                                                                   | Huemer P.<br>Huemer P.                                                                                                        | 20-Jul-2009<br>01-Aug-2009                                                                            | Italy<br>Austria                                                                                          | Belluno<br>Karnten                                                                                      |                                                                                                  | Passo di Valparola E - Passo<br>Falzarecc<br>Schmid-Haus W                                                                                                                                                          | 46,5223999<br>46,98939896                                                                                                                 | 12,00699997<br>13,26690006                                                                                                                         |
| TLMF Lep 0173:<br>TLMF Lep 0173:<br>TLMF Lep 0173:<br>MM03905                                                                                      | 658<br>658<br>658<br>658                                                  | HQ968937<br>HQ968936<br>HQ968942<br>HM872218                                                                         | Tortricidae<br>Tortricidae<br>Tortricidae<br>Tortricidae                                                                                                          | Olethreutinae<br>Olethreutinae<br>Olethreutinae<br>Olethreutinae                                                                   | Epinotia mercuriana<br>Epinotia mercuriana<br>Epinotia mercuriana<br>Epinotia nemorivaga                                                                                                                             | Frölich<br>Frölich<br>Frölich<br>Tengström                                                                                                           | Huemer P<br>Huemer P<br>Huemer P<br>Marko Mutanen                                                                             | 09-Aug-2010<br>09-Aug-2010<br>09-Aug-2010<br>27-Jun-2006                                              | Slovenia<br>Slovenia<br>Slovenia<br>Finland                                                               |                                                                                                         |                                                                                                  | Veliki Mangar<br>Veliki Mangar<br>Veliki Mangar<br>Pudasjærvi                                                                                                                                                       | 46,43849946<br>46,43849946<br>46,43849946<br>65,38999939                                                                                  | 13,63529966<br>13,63529966<br>13,63529966<br>26,91399956                                                                                           |
| MM04124<br>MM04172                                                                                                                                 | 625<br>658                                                                | HM38691:<br>HM38696C                                                                                                 | Tortricidae<br>Tortricidae                                                                                                                                        | Olethreutinae<br>Olethreutinae                                                                                                     | Epinotia nemorivagi<br>Epinotia nemorivagi                                                                                                                                                                           | Tengström<br>Tengström                                                                                                                               | Marko Mutaner<br>Marko Mutaner                                                                                                |                                                                                                       | Finland<br>Finland                                                                                        |                                                                                                         | Ostrobothnia borealis pars<br>australis                                                          | Enontekiö<br>Enontekiö                                                                                                                                                                                              | 68,99700166<br>68,99700166                                                                                                                | 20,74399944<br>20,74399944                                                                                                                         |

|                  |     |          |               |               |                                  |                      |                                                 |             |             |                            |              |                                      |                                                                           |             |              |                       |
|------------------|-----|----------|---------------|---------------|----------------------------------|----------------------|-------------------------------------------------|-------------|-------------|----------------------------|--------------|--------------------------------------|---------------------------------------------------------------------------|-------------|--------------|-----------------------|
| MM09973          | 658 | HM87451C | Tortricidae   | Olethreutinae | Epinotia nemorivag               | Tengström            | Marko Mutaner                                   | 16-Jun-2008 | Finland     |                            |              | Karelia ladogensis                   | Parikkala                                                                 | 61,6170005E | 29,5450000E  |                       |
| TLMF Lep 0272i   | 658 | JF860250 | Tortricidae   | Olethreutinae | Epinotia nemorivag               | Tengström            | Schmid J.                                       | 13-Jul-2006 | Switzerland | Graubunden                 |              |                                      | Bernina/ Hospiz                                                           | 46,4109993  | 10,0229997E  | genitalia on card box |
| BC ZSM Lep 2543f | 658 | GU65601E | Nymphalidae   | Satyrinae     | Erebia medusa                    | Denis & Schiffmüller | Wolfgang Schachi                                | 20-May-2009 | Germany     | Bavaria                    | Oberbayern   | Fuerstenfeldbruck                    | Jexhof, Hackenwieser                                                      | 48,1129998E | 11,2139997E  |                       |
| BC ZSM Lep 3069f | 658 | HM39320A | Nymphalidae   | Satyrinae     | Erebia medusa                    | Denis & Schiffmüller | R. Sturm                                        | 10-Jun-2004 | Germany     | Bavaria                    | Niederbayern | Straubing-Boger                      | Bayer, Wald, Gandsberg                                                    | 48,9459991E | 12,8549995E  |                       |
| BC ZSM Lep 3099f | 658 | HM39320A | Nymphalidae   | Satyrinae     | Erebia medusa                    | Denis & Schiffmüller | R. Sturm                                        | 25-May-2001 | Germany     | Bavaria                    | Schwaben     | Rott a. Lech                         | 47,9080000E                                                               | 10,9359998E |              |                       |
| BC ZSM Lep 3217f | 658 | JF415701 | Nymphalidae   | Satyrinae     | Erebia medusa                    | Denis & Schiffmüller | M. Seizmaier                                    | 20-May-2009 | Germany     | Bavaria                    | Oberbayern   | Bad Tölz-Wolfratshausen              | Lindenberg, Geretsried                                                    | 47,836299E  | 11,4841995E  |                       |
| BC ZSM Lep 3218f | 658 | JF415701 | Nymphalidae   | Satyrinae     | Erebia medusa                    | Denis & Schiffmüller | M. Seizmaier                                    | 19-May-2009 | Germany     | Bavaria                    | Oberbayern   | Munich                               | Isarauen, Fischerhaeuse                                                   | 48,25130081 | 11,6901998E  |                       |
| BC ZSM Lep 5048f | 658 | JX034611 | Nymphalidae   | Satyrinae     | Erebia medusa                    | Denis & Schiffmüller | Dr. Andreas H. Segerer                          | 22-May-2010 | Germany     | Bavaria                    | Oberbayern   | Regensburg                           | Nittendor                                                                 | 49,03139871 | 11,9625997E  |                       |
| TLMF Lep 0111f   | 658 | HQ96847E | Nymphalidae   | Satyrinae     | Erebia medusa                    | Denis & Schiffmüller | Aistleitner U                                   | 14-Jun-2009 | Switzerland | Graubunden                 |              |                                      | Waltensburg/Vuorz, Spinatsch                                              | 46,8400001E | 9,361000061E |                       |
| TLMF Lep 0115f   | 658 | HQ968511 | Nymphalidae   | Satyrinae     | Erebia medusa                    | Denis & Schiffmüller | Mayr T.                                         | 23-May-2009 | Switzerland | Graubunden                 |              |                                      | Chur, Pagig                                                               | 46,8330001E | 9,63300037E  |                       |
| TLMF Lep 0239f   | 658 | JF859942 | Nymphalidae   | Satyrinae     | Erebia medusa                    | Denis & Schiffmüller | Huemmer P                                       | 01-Jul-2010 | Italy       | South Tyro                 |              |                                      | Ritten/ Obergruenwal                                                      | 46,5970001E | 11,4390001E  |                       |
| BC ZSM Lep 21999 | 658 | GU686974 | Nymphalidae   | Satyrinae     | Erebia pandrose                  | Borkhausen           | U. Buchsbaum                                    | 17-Jul-1999 | Germany     | Bavaria                    |              |                                      | Wettersteingebirge, Kreuzeck-Stuibensee                                   | 47,45280075 | 11,0885997   |                       |
| BC ZSM Lep 5032f | 658 | JX034616 | Nymphalidae   | Satyrinae     | Erebia pandrose                  | Borkhausen           | Alfred Haslberge                                | 04-Aug-2004 | Germany     | Bavaria                    | Schwaben     | Oberallgaeu                          | Oberstdorf, Nebelhorn/Kobl                                                | 47,4239006  | 10,3632001E  |                       |
| MM00091          | 658 | HM39637C | Nymphalidae   | Satyrinae     | Erebia pandrose                  | Borkhausen           | Marko Mutaner                                   |             | Finland     |                            |              | Enontekiö                            | 68,9970016E                                                               | 20,7439994E |              |                       |
| MM06305          | 658 | HM873189 | Nymphalidae   | Satyrinae     | Erebia pandrose                  | Borkhausen           | Marko Mutaner, Anttoni Mutanen, Nestori Mutaner | 28-Jun-2006 | Finland     |                            |              | Lapponia inarenensis                 | Inari                                                                     | 68,9970016E | 20,7439994E  |                       |
| MM14572          | 658 | HM878171 | Nymphalidae   | Satyrinae     | Erebia pandrose                  | Borkhausen           | Nestori Mutaner                                 |             | Finland     |                            |              | Lapponia enontekiensis               |                                                                           | 69,0630035E | 21,1019992E  |                       |
| TLMF Lep 0034f   | 658 | HM42583C | Nymphalidae   | Satyrinae     | Erebia pandrose                  | Borkhausen           | Huemmer P                                       | 20-Jul-2009 | Italy       |                            |              | Belluno                              | Passo di Valparola E                                                      | 46,5255012E | 11,9997997E  |                       |
| TLMF Lep 0040f   | 658 | HM425891 | Nymphalidae   | Satyrinae     | Erebia pandrose                  | Borkhausen           | Huemmer P.                                      | 23-Jul-2009 | Italy       |                            |              | Cuneo                                | Colle Fauniera Umgebung/ Demonte NV                                       | 44,38560104 | 7,121940136  |                       |
| TLMF Lep 0117f   | 658 | HQ96852E | Nymphalidae   | Satyrinae     | Erebia pandrose                  | Borkhausen           | Mayr T.                                         | 20-Jun-2009 | Switzerland | Graubunden                 |              |                                      | Val Bever, Alp Suvrett                                                    | 46,5499992E | 9,78299999E  |                       |
| TLMF Lep 0183f   | 658 | HQ96829E | Nymphalidae   | Satyrinae     | Erebia pandrose                  | Borkhausen           | Mayr T.                                         | 20-Jun-2009 | Switzerland | Graubunden                 |              |                                      | Val Bever, Alp Suvrett                                                    | 46,5499992E | 9,78332996E  |                       |
| TLMF Lep 05519   | 658 | JX034634 | Nymphalidae   | Satyrinae     | Erebia pandrose                  | Borkhausen           | Huemmer P. & Tarmann G. M.                      | 28-Jul-2011 | Macedonia   |                            |              |                                      | Mavrovo NP, Korab, summit ridge                                           | 41,78900146 | 20,54700089  |                       |
| TLMF Lep 05520   | 658 | JX034650 | Nymphalidae   | Satyrinae     | Erebia pandrose                  | Borkhausen           | Huemmer P. & Tarmann G. M.                      | 28-Jul-2011 | Macedonia   |                            |              |                                      | Mavrovo NP, Korab, summit ridge                                           | 41,78900146 | 20,54700089  |                       |
| MM10583          | 658 | HQ57038E | Nymphalidae   | Satyrinae     | Erebia polaris                   | Staudinger           | Marko Mutaner                                   |             | Finland     |                            |              | Lapponia inarenensis                 | Utsjok                                                                    | 69,28600311 | 25,7339992E  |                       |
| MM10584          | 658 | HQ57038E | Nymphalidae   | Satyrinae     | Erebia polaris                   | Staudinger           | Marko Mutaner                                   |             | Finland     |                            |              | Lapponia inarenensis                 | Utsjok                                                                    | 69,28600311 | 25,7339992E  |                       |
| MM17176          | 658 | JF853668 | Nymphalidae   | Satyrinae     | Erebia polaris                   | Staudinger           | Marko Mutaner                                   | 27-Jun-2002 | Finland     |                            |              | Lapponia inarenensis                 | Utsjok                                                                    | 69,28600311 | 25,7339992E  |                       |
| MM00717          | 658 | HM871151 | Crambidae     | Scopariinae   | Eudonia sudetica                 | Zeller               | Torni Mutanen                                   | 22-Jul-2006 | Finland     |                            |              | Ostrobottnia borealis pars borealis  | Ranua                                                                     | 65,88200378 | 26,34199905  |                       |
| MM0413E          | 658 | HM38692Z | Crambidae     | Scopariinae   | Eudonia sudetica                 | Zeller               | Marko Mutaner                                   |             | Finland     |                            |              | Lapponia kemensis pars occidentalis  | Enontekiö                                                                 | 68,9970016E | 20,7439994E  |                       |
| MM08041          | 658 | HM873745 | Crambidae     | Scopariinae   | Eudonia sudetica                 | Zeller               | Marko Mutanen, Panu Vaelimaeki                  |             | Finland     |                            |              | Lapponia kemensis pars occidentalis  | Kolari                                                                    | 67,27600098 | 23,75300026  |                       |
| MM14647          | 658 | HM876201 | Crambidae     | Scopariinae   | Eudonia sudetica                 | Zeller               | Marko Mutanen, Nestori Mutanen, Anttoni Mutaner | 28-Jul-2009 | Finland     |                            |              | Ostrobottnia borealis pars australis | Kiminki                                                                   | 65,07099915 | 25,72500038  |                       |
| TLMF Lep 00128   | 658 | GU689176 | Crambidae     | Scopariinae   | Eudonia sudetica                 | Zeller               | Huemmer P.                                      | 03-Aug-2008 | Italy       | Piedmont                   |              | Cuneo                                | Colle Fauniera Umgebung- Demonte NW                                       | 44,38600159 | 7,122000217  |                       |
| TLMF Lep 00129   | 658 | GU689177 | Crambidae     | Scopariinae   | Eudonia sudetica                 | Zeller               | Huemmer P.                                      | 03-Aug-2008 | Italy       | Piedmont                   |              | Cuneo                                | Colle Fauniera Umgebung- Demonte NW                                       | 44,38600159 | 7,122000217  |                       |
| TLMF Lep 00543   | 658 | HM381386 | Crambidae     | Scopariinae   | Eudonia sudetica                 | Zeller               | Huemmer P.                                      | 13-Jul-2009 | Austria     | Karnten                    |              |                                      | Petzen N, Umg. Gh. Siebenhuetten                                          | 46,51819992 | 14,77350044  |                       |
| TLMF Lep 00619   | 658 | HM381452 | Crambidae     | Scopariinae   | Eudonia sudetica                 | Zeller               | Tarmann G. M.                                   | 22-Jul-2009 | Italy       |                            |              | Belluno                              | Passo di Valparola SW, Mt. Castelle                                       | 46,52389908 | 11,97669983  |                       |
| TLMF Lep 00639   | 658 | HM426007 | Crambidae     | Scopariinae   | Eudonia sudetica                 | Zeller               | Huemmer P.                                      | 27-Jul-2009 | France      | Provence-Alpes-Cote d'Azur |              |                                      | N Col de la Boucharde/ Col de la Cayolle N                                | 44,28329849 | 6,743330002  |                       |
| TLMF Lep 0132f   | 307 | JX034575 | Crambidae     | Scopariinae   | Eudonia sudetica                 | Zeller               | Nel J.                                          | 04-Aug-2002 | France      | Rhone-Alpes                |              |                                      | Port de la Neige, Iseran                                                  | 42,42670059 | 13,71329975  | 14394JN               |
| TLMF Lep 01524   | 658 | HQ968736 | Crambidae     | Scopariinae   | Eudonia sudetica                 | Zeller               | Huemmer P.                                      | 14-Jul-2010 | Italy       |                            |              | L' Aquila                            | NP Gran Sasso, Campo Imperatore, ex Miniera di Lignit                     | 42,42670059 | 13,71329975  |                       |
| TLMF Lep 01525   | 658 | HQ968737 | Crambidae     | Scopariinae   | Eudonia sudetica                 | Zeller               | Huemmer P.                                      | 14-Jul-2010 | Italy       | Abruzzi                    |              | L' Aquila                            | NP Gran Sasso, Campo Imperatore, ex Miniera di Lignit                     | 42,42670059 | 13,71329975  |                       |
| TLMF Lep 0173f   | 658 | HQ968934 | Crambidae     | Scopariinae   | Eudonia sudetica                 | Zeller               | Huemmer P                                       | 09-Aug-2010 | Slovenia    |                            |              |                                      | Veliki Mangar                                                             | 46,4384994E | 13,6352996E  |                       |
| MM03145          | 658 | HM871840 | Yponomeutidae | Yponomeutinae | Euhypnomoeutides albithoracellus | Zeller               | Huemmer P                                       |             | Finland     |                            |              | Ostrobottnia borealis pars australis | Kiminki                                                                   | 65,07099915 | 25,72500038  |                       |
| MM08051          | 641 | HM872911 | Yponomeutidae | Yponomeutinae | Euhypnomoeutides albithoracellus | Gaj                  | Marko Mutanen, Panu Vaelimaeki                  |             | Finland     |                            |              | Lapponia kemensis pars occidentalis  | Kolari                                                                    | 67,27600098 | 23,75300026  |                       |
| MM13587          | 658 | HM87566E | Yponomeutidae | Yponomeutinae | Euhypnomoeutides albithoracellus | Gaj                  | Marko Mutanen, Panu Vaelimaeki                  |             | Finland     |                            |              | Regio Aboensis                       | Dragsfjaerd                                                               | 60,0110015E | 22,4979991E  |                       |
| TLMF Lep 02732   | 627 | JF860253 | Yponomeutidae | Yponomeutinae | Euhypnomoeutides albithoracellus | Gaj                  | Marko Mutanen, Panu Vaelimaeki                  | 30-Jun-2008 | Switzerland | Graubunden                 |              |                                      | Sesvenna                                                                  | 46,60699844 | 10,25999979  |                       |
| TLMF Lep 0286f   | 658 | JF860334 | Yponomeutidae | Yponomeutinae | Euhypnomoeutides albithoracellus | Gaj                  | Huemmer P                                       | 23-Jun-1993 | Austria     | Tyrol                      |              |                                      | Osttirol, Virginta                                                        | 47,0200004E | 12,3629999E  |                       |
| TLMF Lep 0286f   | 658 | JF860335 | Yponomeutidae | Yponomeutinae | Euhypnomoeutides albithoracellus | Gaj                  | Huemmer P                                       | 23-Jun-1993 | Austria     | Tyrol                      |              |                                      | Osttirol, Virginta                                                        | 47,0200004E | 12,3629999E  |                       |
| 08BBLEP-02354    | 658 | JX008100 | Geometridae   | Larentiinae   | Eupithecia cretaceata            | Packard              | J.Straka                                        | 21-Jul-2008 | Canada      | Alberta                    |              | Waterton                             | Waterton Lakes Nat. Park - Townsli Campground                             | 49,04499817 | -113,913002  |                       |
| 08BBLEP-02423    | 658 | JX008109 | Geometridae   | Larentiinae   | Eupithecia cretaceata            | Packard              | J.Straka,J.Cossey                               | 26-Jul-2008 | Canada      | Alberta                    |              | Waterton                             | Waterton Lakes Nat. Park - Maskinonge Lak                                 | 49,11000061 | -113,8399963 |                       |
| 08BBLEP-02565    | 656 | JX008388 | Geometridae   | Larentiinae   | Eupithecia cretaceata            | Packard              | J.Straka,J.Cossey                               | 26-Jul-2008 | Canada      | Alberta                    |              | Waterton                             | Waterton Lakes Nat. Park - Blakiston Creel                                | 49,07799911 | -113,8820038 |                       |
| 08BBLEP-03494    | 658 | JX008145 | Geometridae   | Larentiinae   | Eupithecia cretaceata            | Packard              | J.Straka,J.Cossey                               | 26-Jul-2008 | Canada      | Alberta                    |              | Waterton                             | Waterton Lakes Nat. Park - Blakiston Creel                                | 49,07799911 | -113,8820038 |                       |
| 08BBLEP-04512    | 658 | JX008167 | Geometridae   | Larentiinae   | Eupithecia cretaceata            | Packard              | J.Straka,J.Cossey                               | 31-Jul-2008 | Canada      | Alberta                    |              | Banff                                | Banff Nat. Park - Cave and Basin Area                                     | 51,17100143 | -115,5879974 |                       |
| 08BBLEP-04906    | 658 | JX008275 | Geometridae   | Larentiinae   | Eupithecia cretaceata            | Packard              | J.Straka,J.Cossey                               | 06-Aug-2008 | Canada      | Alberta                    |              | Waterton                             | Waterton Lakes Nat. Park - Blakiston Creel                                | 49,07799911 | -113,8820038 |                       |
| 08BBLEP-04913    | 658 | JX008365 | Geometridae   | Larentiinae   | Eupithecia cretaceata            | Packard              | J.Straka,J.Cossey                               | 06-Aug-2008 | Canada      | Alberta                    |              | Waterton                             | Waterton Lakes Nat. Park - Blakiston Creel                                | 49,07799911 | -113,8820038 |                       |
| 08BBLEP-05001    | 658 | JX008181 | Geometridae   | Larentiinae   | Eupithecia cretaceata            | Packard              | J.Straka,J.Cossey                               | 07-Aug-2008 | Canada      | Alberta                    |              | Waterton                             | Waterton Lakes Nat. Park - Blakiston Creel                                | 49,08999902 | -113,9509964 |                       |
| 08BBLEP-05053    | 658 | JX008117 | Geometridae   | Larentiinae   | Eupithecia cretaceata            | Packard              | J.Straka,J.Cossey                               | 07-Aug-2008 | Canada      | Alberta                    |              | Waterton                             | Waterton Lakes Nat. Park - Crandell Grassland/creekside forest campground | 49,08999902 | -113,9509964 |                       |
| 10BBCLP-107C     | 658 | JF842083 | Geometridae   | Larentiinae   | Eupithecia cretaceata            | Packard              | BiObus 201C                                     | 20-Jul-2010 | Canada      | British Columbia           |              | Yoho NP                              | Kicking Horse Cmpgrd                                                      | 51,4239997E | -116,429000E |                       |
| 10BBCLP-107E     | 658 | JF842089 | Geometridae   | Larentiinae   | Eupithecia cretaceata            | Packard              | BiObus 2010                                     | 15-Jul-2010 | Canada      | British Columbia           |              | Glacier NP                           | Hemlock Grove Tr.                                                         | 51,24200058 | -117,6490021 |                       |
| TLMF Lep 00209   | 658 | GU689138 | Geometridae   | Larentiinae   | Eupithecia cretaceata            | Packard              | Huemmer P.                                      | 12-Jun-2007 | Italy       | Friuli-Venezia Giulia      |              | Udine, Val Venzonassa                | Jof Ungarina SW-Seite- Malga Confin W                                     | 46,34400177 | 13,2089963   |                       |
| TLMF Lep 00210   | 574 | GU689132 | Geometridae   | Larentiinae   | Eupithecia cretaceata            | Packard              | Huemmer P.                                      | 12-Jun-2007 | Italy       | Friuli-Venezia Giulia      |              | Udine, Val Venzonassa                | Jof Ungarina SW-Seite- Malga Confin W                                     | 46,34400177 | 13,2089963   |                       |
| TLMF Lep 00234   | 658 | HM425743 | Geometridae   | Larentiinae   | Eupithecia cretaceata            | Packard              | Huemmer P.                                      | 13-Jul-2009 | Austria     |                            |              |                                      | Petzen N, Umg. Gh. Siebenhuetten                                          | 46,51819992 | 14,77350044  |                       |





|                 |     |          |           |             |                      |                        |                      |             |               |                           |                                |                                          |                                 |              |              |
|-----------------|-----|----------|-----------|-------------|----------------------|------------------------|----------------------|-------------|---------------|---------------------------|--------------------------------|------------------------------------------|---------------------------------|--------------|--------------|
| 08BBLEP-04274   | 658 | JX008184 | Crambidae | Scopariinae | Gesneria centuriella | Denis & Schiffermüller | J.Straka,J.Cossey    | 04-Aug-2008 | Canada        | Alberta                   | Banff                          | Banff Nat. Park - Johnson Lake Area      | Meadow, beside creek and lake   | 51,19800186  | -115,4789963 |
| 08BBLEP-04282   | 658 | JX008170 | Crambidae | Scopariinae | Gesneria centuriella | Denis & Schiffermüller | J.Straka,J.Cossey    | 04-Aug-2008 | Canada        | Alberta                   | Banff                          | Banff Nat. Park - Johnson Lake Area      | Meadow, beside creek and lake   | 51,19800186  | -115,4789963 |
| 08BBLEP-04297   | 658 | JX008405 | Crambidae | Scopariinae | Gesneria centuriella | Denis & Schiffermüller | J.Straka,J.Cossey    | 04-Aug-2008 | Canada        | Alberta                   | Banff                          | Banff Nat. Park - Johnson Lake Area      | Meadow, beside creek and lake   | 51,19800186  | -115,4789963 |
| 08BBLEP-04309   | 658 | JX008309 | Crambidae | Scopariinae | Gesneria centuriella | Denis & Schiffermüller | J.Straka,J.Cossey    | 04-Aug-2008 | Canada        | Alberta                   | Banff                          | Banff Nat. Park - Johnson Lake Area      | Meadow, beside creek and lake   | 51,19800186  | -115,4789963 |
| 08BBLEP-04447   | 633 | JX008395 | Crambidae | Scopariinae | Gesneria centuriella | Denis & Schiffermüller | J.Straka,J.Cossey    | 31-Jul-2008 | Canada        | Alberta                   | Banff                          | Banff Nat. Park - Cave and Basin Area    | Spring-fed marsh/meadow         | 51,17100143  | -115,5879974 |
| 08BBLEP-04450   | 656 | JX008348 | Crambidae | Scopariinae | Gesneria centuriella | Denis & Schiffermüller | J.Straka,J.Cossey    | 31-Jul-2008 | Canada        | Alberta                   | Banff                          | Banff Nat. Park - Cave and Basin Area    | Spring-fed marsh/meadow         | 51,17100143  | -115,5879974 |
| 08BBLEP-04451   | 658 | JX008362 | Crambidae | Scopariinae | Gesneria centuriella | Denis & Schiffermüller | J.Straka,J.Cossey    | 31-Jul-2008 | Canada        | Alberta                   | Banff                          | Banff Nat. Park - Cave and Basin Area    | Spring-fed marsh/meadow         | 51,17100143  | -115,5879974 |
| 08BBLEP-04459   | 655 | JX008249 | Crambidae | Scopariinae | Gesneria centuriella | Denis & Schiffermüller | J.Straka,J.Cossey    | 31-Jul-2008 | Canada        | Alberta                   | Banff                          | Banff Nat. Park - Cave and Basin Area    | Spring-fed marsh/meadow         | 51,17100143  | -115,5879974 |
| 08BBLEP-04460   | 599 | JX008232 | Crambidae | Scopariinae | Gesneria centuriella | Denis & Schiffermüller | J.Straka,J.Cossey    | 31-Jul-2008 | Canada        | Alberta                   | Banff                          | Banff Nat. Park - Cave and Basin Area    | Spring-fed marsh/meadow         | 51,17100143  | -115,5879974 |
| 08BBLEP-04462   | 621 | JX008429 | Crambidae | Scopariinae | Gesneria centuriella | Denis & Schiffermüller | J.Straka,J.Cossey    | 31-Jul-2008 | Canada        | Alberta                   | Banff                          | Banff Nat. Park - Cave and Basin Area    | Spring-fed marsh/meadow         | 51,17100143  | -115,5879974 |
| 08BBLEP-04479   | 658 | JX008354 | Crambidae | Scopariinae | Gesneria centuriella | Denis & Schiffermüller | J.Straka,J.Cossey    | 31-Jul-2008 | Canada        | Alberta                   | Banff                          | Banff Nat. Park - Cave and Basin Area    | Spring-fed marsh/meadow         | 51,17100143  | -115,5879974 |
| 08BBLEP-04481   | 622 | JX008266 | Crambidae | Scopariinae | Gesneria centuriella | Denis & Schiffermüller | J.Straka,J.Cossey    | 31-Jul-2008 | Canada        | Alberta                   | Banff                          | Banff Nat. Park - Cave and Basin Area    | Spring-fed marsh/meadow         | 51,17100143  | -115,5879974 |
| 08BBLEP-04508   | 658 | JX008280 | Crambidae | Scopariinae | Gesneria centuriella | Denis & Schiffermüller | J.Straka,J.Cossey    | 31-Jul-2008 | Canada        | Alberta                   | Banff                          | Banff Nat. Park - Cave and Basin Area    | Spring-fed marsh/meadow         | 51,17100143  | -115,5879974 |
| 08BBLEP-04514   | 634 | JX008337 | Crambidae | Scopariinae | Gesneria centuriella | Denis & Schiffermüller | J.Straka,J.Cossey    | 31-Jul-2008 | Canada        | Alberta                   | Banff                          | Banff Nat. Park - Cave and Basin Area    | Spring-fed marsh/meadow         | 51,17100143  | -115,5879974 |
| 08BBLEP-04516   | 658 | JX008378 | Crambidae | Scopariinae | Gesneria centuriella | Denis & Schiffermüller | J.Straka,J.Cossey    | 31-Jul-2008 | Canada        | Alberta                   | Banff                          | Banff Nat. Park - Cave and Basin Area    | Spring-fed marsh/meadow         | 51,17100143  | -115,5879974 |
| 08BBLEP-04517   | 658 | JX008186 | Crambidae | Scopariinae | Gesneria centuriella | Denis & Schiffermüller | J.Straka,J.Cossey    | 31-Jul-2008 | Canada        | Alberta                   | Banff                          | Banff Nat. Park - Cave and Basin Area    | Spring-fed marsh/meadow         | 51,17100143  | -115,5879974 |
| 08BBLEP-04522   | 658 | JX008171 | Crambidae | Scopariinae | Gesneria centuriella | Denis & Schiffermüller | J.Straka,J.Cossey    | 31-Jul-2008 | Canada        | Alberta                   | Banff                          | Banff Nat. Park - Cave and Basin Area    | Spring-fed marsh/meadow         | 51,17100143  | -115,5879974 |
| 08BBLEP-04524   | 632 | JX008138 | Crambidae | Scopariinae | Gesneria centuriella | Denis & Schiffermüller | J.Straka,J.Cossey    | 31-Jul-2008 | Canada        | Alberta                   | Banff                          | Banff Nat. Park - Cave and Basin Area    | Spring-fed marsh/meadow         | 51,17100143  | -115,5879974 |
| 08BBLEP-04527   | 658 | JX008234 | Crambidae | Scopariinae | Gesneria centuriella | Denis & Schiffermüller | J.Straka,J.Cossey    | 31-Jul-2008 | Canada        | Alberta                   | Banff                          | Banff Nat. Park - Cave and Basin Area    | Spring-fed marsh/meadow         | 51,17100143  | -115,5879974 |
| 08BBLEP-04530   | 658 | JX008394 | Crambidae | Scopariinae | Gesneria centuriella | Denis & Schiffermüller | J.Straka,J.Cossey    | 31-Jul-2008 | Canada        | Alberta                   | Banff                          | Banff Nat. Park - Cave and Basin Area    | Spring-fed marsh/meadow         | 51,17100143  | -115,5879974 |
| 08BBLEP-04544   | 613 | JX008445 | Crambidae | Scopariinae | Gesneria centuriella | Denis & Schiffermüller | J.Straka,J.Cossey    | 31-Jul-2008 | Canada        | Alberta                   | Banff                          | Banff Nat. Park - Cave and Basin Area    | Spring-fed marsh/meadow         | 51,17100143  | -115,5879974 |
| 08BBLEP-04545   | 612 | JX008305 | Crambidae | Scopariinae | Gesneria centuriella | Denis & Schiffermüller | J.Straka,J.Cossey    | 31-Jul-2008 | Canada        | Alberta                   | Banff                          | Banff Nat. Park - Cave and Basin Area    | Spring-fed marsh/meadow         | 51,17100143  | -115,5879974 |
| 08BBLEP-04546   | 646 | JX008340 | Crambidae | Scopariinae | Gesneria centuriella | Denis & Schiffermüller | J.Straka,J.Cossey    | 31-Jul-2008 | Canada        | Alberta                   | Banff                          | Banff Nat. Park - Cave and Basin Area    | Spring-fed marsh/meadow         | 51,17100143  | -115,5879974 |
| 08BBLEP-04548   | 613 | JX008419 | Crambidae | Scopariinae | Gesneria centuriella | Denis & Schiffermüller | J.Straka,J.Cossey    | 31-Jul-2008 | Canada        | Alberta                   | Banff                          | Banff Nat. Park - Cave and Basin Area    | Spring-fed marsh/meadow         | 51,17100143  | -115,5879974 |
| 08BBLEP-04552   | 658 | JX008269 | Crambidae | Scopariinae | Gesneria centuriella | Denis & Schiffermüller | J.Straka,J.Cossey    | 31-Jul-2008 | Canada        | Alberta                   | Banff                          | Banff Nat. Park - Cave and Basin Area    | Spring-fed marsh/meadow         | 51,17100143  | -115,5879974 |
| 08BBLEP-04742   | 658 | JX008241 | Crambidae | Scopariinae | Gesneria centuriella | Denis & Schiffermüller | J.Straka,J.Cossey    | 04-Aug-2008 | Canada        | Alberta                   | Banff                          | Banff Nat. Park - Johnson Lake Area      | Mixed forest/grassland          | 51,19900131  | -115,4869995 |
| 08JDWBC-1392    | 658 | JX008428 | Crambidae | Scopariinae | Gesneria centuriella | Denis & Schiffermüller | deWaard, J.R.        | 09-Jul-2006 | Canada        | British Columbia          | Kamloops                       | Sugarloaf Ranch                          | TRSB1                           | 50,63800046  | -120,4509964 |
| 09PROBE-09305   | 658 | HM375562 | Crambidae | Scopariinae | Gesneria centuriella | Denis & Schiffermüller | P.D.N. Hebert        | 26-Jul-2009 | Canada        | Manitoba                  | Churchill                      | 26 km SE Churchill, Twin Lakes burn site | 58,61999893                     | -93,83000183 |              |
| 10BBCLP-1181    | 658 | JF842198 | Crambidae | Scopariinae | Gesneria centuriella | Denis & Schiffermüller | BiObus 201C          | 23-Jun-2010 | Canada        | Alberta                   | Jasper NP                      | Whistlers Campgrd                        | Pine forest                     | 52,8429985   | -118,0749966 |
| 10BBCLP-1191    | 658 | JF942204 | Crambidae | Scopariinae | Gesneria centuriella | Denis & Schiffermüller | BiObus 201C          | 22-Jul-2010 | Canada        | British Columbia          | Yoho NP                        | Kicking Horse Campgrd                    | Forested campgrd                | 51,42399976  | -116,4290006 |
| 10JDWBC-3083    | 658 | HM864911 | Crambidae | Scopariinae | Gesneria centuriella | Denis & Schiffermüller | deWaard, J.R.        | 30-Jul-2006 | Canada        | British Columbia          | nr. Hazelton                   | Date Cr. Silvicultural System            | B5-T                            | 55,42699814  | -127,8030014 |
| 10JDWBC-3811    | 658 | HM865705 | Crambidae | Scopariinae | Gesneria centuriella | Denis & Schiffermüller | deWaard, J.R.        | 30-Jul-2006 | Canada        | British Columbia          | nr. Hazelton                   | Date Creek Silvicultural System          | B3-T                            | 55,43899814  | -127,814003  |
| 10JDWBC-4047    | 633 | HQ682305 | Crambidae | Scopariinae | Gesneria centuriella | Denis & Schiffermüller | deWaard, J.R.        | 30-Jul-2006 | Canada        | British Columbia          | nr. Hazelton                   | Date Cr. Silvicultural System            | A2-T                            | 55,4659996   | -127,8150024 |
| 10JDWBC-5949    | 658 | HM868030 | Crambidae | Scopariinae | Gesneria centuriella | Denis & Schiffermüller | deWaard, J.R.        | 10-Jul-2006 | Canada        | British Columbia          | Okanagan Falls                 | Irrigation Rd. Eas                       | OFIR11                          | 49,31200021  | -119,5019988 |
| 10JDWBC-6012    | 658 | HM868104 | Crambidae | Scopariinae | Gesneria centuriella | Denis & Schiffermüller | deWaard, J.R.        | 11-Jul-2006 | Canada        | British Columbia          | nr. Kamloops                   | Coquihalla Highwa'                       | TRCQ1                           | 50,64300156  | -120,4850006 |
| 10JDWBC-6054    | 658 | HM868144 | Crambidae | Scopariinae | Gesneria centuriella | Denis & Schiffermüller | deWaard, J.R.        | 11-Jul-2006 | Canada        | British Columbia          | nr. Kamloops                   | Dewdrop Ecreserve Eas                    | TRDE2                           | 50,74700166  | -120,5550002 |
| 10JDWBC-6101    | 658 | HM868201 | Crambidae | Scopariinae | Gesneria centuriella | Denis & Schiffermüller | deWaard, J.R.        | 11-Jul-2006 | Canada        | British Columbia          | nr. Kamloops                   | Six Mile East transec                    | TR6M1                           | 50,73899841  | -120,7269974 |
| 10JDWBC-6393    | 658 | HM868505 | Crambidae | Scopariinae | Gesneria centuriella | Denis & Schiffermüller | deWaard, J.R.        | 04-Aug-2006 | Canada        | British Columbia          | nr. Kamloops                   | Coquihalla Highwa'                       | TRCQ1                           | 50,64300156  | -120,4850006 |
| CNACLEP00025411 | 623 | JX008114 | Crambidae | Scopariinae | Gesneria centuriella | Denis & Schiffermüller | JF Landry & L Humblt | 01-Jun-2006 | Canada        | British Columbia          | 4.5 km NE Kelowna;             | Beaver Lake R                            | TRCQ1                           | 50,0359992   | -119,3489996 |
| CNACLEP00059307 | 658 | JX008126 | Crambidae | Scopariinae | Gesneria centuriella | Denis & Schiffermüller | E.E. Sterns          | 26-Jul-1955 | Canada        | Newfoundland and Labrador | Cartwright                     |                                          | 53,70600128                     | -57,02700043 |              |
| CNACLEP00067181 | 658 | HQ370952 | Crambidae | Scopariinae | Gesneria centuriella | Denis & Schiffermüller | K. Mikkola           | 07-Jun-1992 | United States | Wyoming                   |                                | Bubois Togwotee Pas                      |                                 | 48,80699921  | -97,20500183 |
| CNACLEP00067844 | 658 | JX008432 | Crambidae | Scopariinae | Gesneria centuriella | Denis & Schiffermüller | Henry Hensel         | 21-Jul-1991 | Canada        | Manitoba                  | Abitibi-Oues                   | Lasarre Churchill                        | 24 km E Northern Studies Centre | 58,73400116  | -93,80999756 |
| CNACLEP00067844 | 658 | HQ257154 | Crambidae | Scopariinae | Gesneria centuriella | Denis & Schiffermüller | A. Mutuura           | 15-Jul-1968 | Canada        | Newfoundland and Labrador |                                | near Doyles                              | 47,83100128                     | -59,19100189 |              |
| CNACLEP00067844 | 658 | JX008246 | Crambidae | Scopariinae | Gesneria centuriella | Denis & Schiffermüller | Henry Hense          | 04-Aug-1990 | Canada        | Quebec                    |                                | vicinity of Schefferville                | 54,82099911                     | -66,82499696 |              |
| CNACLEP00067844 | 658 | JX008101 | Crambidae | Scopariinae | Gesneria centuriella | Denis & Schiffermüller | Henry Hense          | 01-Aug-1990 | Canada        | Quebec                    |                                | vicinity of Schefferville                | 54,82099911                     | -66,82499696 |              |
| CNACLEP00067844 | 658 | JX008442 | Crambidae | Scopariinae | Gesneria centuriella | Denis & Schiffermüller | Henry Hense          | 09-Jul-2002 | Canada        | Quebec                    |                                | vicinity of Schefferville                | 54,82099911                     | -66,82499696 |              |
| CNACLEP00067844 | 658 | JX008127 | Crambidae | Scopariinae | Gesneria centuriella | Denis & Schiffermüller | Henry Hense          | 01-Aug-1990 | Canada        | Quebec                    |                                | vicinity of Schefferville                | 54,82099911                     | -66,82499696 |              |
| CNACLEP00068811 | 658 | JX008131 | Crambidae | Scopariinae | Gesneria centuriella | Denis & Schiffermüller | Normand Juneau       | 06-Jul-2002 | Canada        | Quebec                    |                                | Oriskany                                 | 47,48899841                     | -73,65499876 |              |
| CNACLEP00068811 | 658 | JX008136 | Crambidae | Scopariinae | Gesneria centuriella | Denis & Schiffermüller | Normand Juneau       | 06-Jul-2002 | Canada        | Quebec                    |                                | Oriskany                                 | 47,48899841                     | -73,65499876 |              |
| CNACLEP00068811 | 658 | JX008103 | Crambidae | Scopariinae | Gesneria centuriella | Denis & Schiffermüller | Normand Juneau       | 06-Jul-2002 | Canada        | Quebec                    |                                | Oriskany                                 | 47,48899841                     | -73,65499876 |              |
| CNACLEP00068811 | 658 | JX008158 | Crambidae | Scopariinae | Gesneria centuriella | Denis & Schiffermüller | Normand Juneau       | 25-Jun-2000 | Canada        | Quebec                    |                                | Oriskany                                 | 47,48899841                     | -73,65499876 |              |
| CNACLEP00068811 | 658 | HQ257157 | Crambidae | Scopariinae | Gesneria centuriella | Denis & Schiffermüller | Normand Juneau       | 09-Jul-2002 | Canada        | Quebec                    |                                | Oriskany                                 | 47,48899841                     | -73,65499876 |              |
| CNACLEP00078031 | 658 | JX008179 | Crambidae | Scopariinae | Gesneria centuriella | Denis & Schiffermüller | H. Hense             | 14-Jul-2002 | Canada        | Nunavut                   | vic. Anivat                    |                                          | 61,09600067                     | -94,0719986  |              |
| KENWR 6636      | 658 | JX008410 | Crambidae | Scopariinae | Gesneria centuriella | Denis & Schiffermüller | D.Collet             |             | United States | Alaska                    | Kenai National Wildlife Refuge |                                          |                                 |              |              |
| KENWR 6645      | 658 | JX008148 | Crambidae | Scopariinae | Gesneria centuriella | Denis & Schiffermüller | D.Collet             | 08-Jul-2004 | United States | Alaska                    | Kenai National Wildlife Refuge | Sterling, Corey St.                      | glauca forest                   | 60,5         |              |

|                  |     |           |             |             |                          |                        |                                 |             |               |                           |                                               |                    |                                                        |             |               |
|------------------|-----|-----------|-------------|-------------|--------------------------|------------------------|---------------------------------|-------------|---------------|---------------------------|-----------------------------------------------|--------------------|--------------------------------------------------------|-------------|---------------|
| KENWR 6645b      | 658 | JX008185  | Crambidae   | Scopariinae | Gesneria centuriella     | Denis & Schiffermüller | D.Collet                        | 08-Jul-2004 | United States | Alaska                    | Kenai National Wildlife Refuge                | Sterling, Corey St | glauca forest                                          | 60,5        |               |
| KENWR 6646       | 655 | JX008162  | Crambidae   | Scopariinae | Gesneria centuriella     | Denis & Schiffermüller | D.Collet                        | 10-Jul-2004 | United States | Alaska                    | Kenai National Wildlife Refuge                | Sterling, Corey St | glauca forest                                          | 60,5        | -150,8329926  |
| KENWR LEP-18     | 658 | JX008317  | Crambidae   | Scopariinae | Gesneria centuriella     | Denis & Schiffermüller | D.Collet                        | 19-Jun-2004 | United States | Alaska                    | Kenai National Wildlife Refuge                | Finger Lake Road   | closed birch forest                                    | 60,85000153 | -150,8329926  |
| MDH00290f        | 658 | JX008427  | Crambidae   | Scopariinae | Gesneria centurielle     | Denis & Schiffermüller | Daniel Handfielk                | 18-Jun-2003 | Canada        | Quebec                    | CAN/QC-Carletor                               |                    | Chemin St-Ongr                                         |             |               |
| MM10542          | 603 | HQ2570384 | Crambidae   | Scopariinae | Gesneria centurielle     | Denis & Schiffermüller | Marko Mutaner                   |             | Finland       |                           |                                               |                    | Enontekiö                                              | 68,9970016f | 20,7439994f   |
| MM15775          | 658 | HM876555  | Crambidae   | Scopariinae | Gesneria centuriella     | Denis & Schiffermüller | Tomu Mutanen                    | 29-Jun-1996 | Finland       |                           |                                               |                    | Lapponia onontekiensis                                 | 65,77100372 | 24,37999916   |
|                  |     |           |             |             |                          |                        |                                 |             |               |                           |                                               |                    | Ostrobotnia borealis pars borealis                     |             |               |
| TLMF Lep 0047f   | 658 | HM42595f  | Crambidae   | Scopariinae | Gesneria centurielle     | Denis & Schiffermüller | Huemer P                        | 05-Jun-2006 | Italy         | South Tyro                |                                               |                    | Bad Ratzes S/ Seis am Schlen                           | 46,5299987f | 11,5864000f   |
| UBC-2006-039f    | 656 | JX008268  | Crambidae   | Scopariinae | Gesneria centurielle     | Denis & Schiffermüller | A L J & Derhousoff              | 27-Jun-2006 | Canada        | British Columbia          |                                               | Pitt Meadow        |                                                        | 49,26900101 | -122,6389996  |
| BC NP 030f       | 658 | JX03464f  | Geometridae | Ennominae   | Glacies coracina         | Esper                  | K. Huber                        | 29-Jun-2000 | Sweden        | Norrbotter                |                                               |                    | Abisko                                                 | 68,36000081 | 18,6900005f   |
| BC NP 0307       | 658 | JX034652  | Geometridae | Ennominae   | Glacies coracina         | Esper                  | N. Poel                         | 17-Jul-2005 | Slovenia      |                           |                                               |                    | Julian Alps                                            | 46,3499984f | 13,5500001f   |
| BC NP 030f       | 658 | JX034592  | Geometridae | Ennominae   | Glacies coracina         | Esper                  | N. Poel                         | 20-Jul-2007 | Austria       |                           |                                               |                    | Dorfertal, Im Grunc                                    | 47,11000061 | 12,6199998f   |
| MM00085          | 658 | HM39636f  | Geometridae | Ennominae   | Glacies coracina         | Esper                  | Marko Mutaner                   |             | Finland       |                           |                                               |                    | Enontekiö                                              | 68,9970016f | 20,7439994f   |
| MM04111          | 658 | HM39690f  | Geometridae | Ennominae   | Glacies coracina         | Esper                  | Marko Mutaner                   |             | Finland       |                           |                                               |                    | Enontekiö                                              | 68,9970016f | 20,7439994f   |
| MM06309          | 658 | HM873192  | Geometridae | Ennominae   | Glacies coracina         | Esper                  | Marko Mutanen, Anttoni Mutanen, | 28-Jun-2006 | Finland       |                           |                                               |                    | Lapponia inarensis                                     | 68,4469986  | 27,41399956   |
|                  |     |           |             |             |                          |                        |                                 |             |               |                           |                                               |                    | Nestori Mutaner                                        |             |               |
| TLMF Lep 0034f   | 658 | HM42583f  | Geometridae | Ennominae   | Glacies coracina         | Esper                  | Huemer P                        | 20-Jul-2006 | Italy         |                           |                                               |                    | Bellunc                                                | 46,5255012f | 11,9997997f   |
| TLMF Lep 0038f   | 658 | HM42587f  | Geometridae | Ennominae   | Glacies coracina         | Esper                  | Huemer P                        | 01-Aug-2005 | Austria       |                           |                                               |                    | Passo di Valparola E                                   | 46,99309921 | 13,27110004   |
| TLMF Lep 01463   | 620 | HQ968679  | Geometridae | Ennominae   | Glacies coracina         | Esper                  | Habeler H.                      | 05-Jul-2009 | Austria       |                           |                                               |                    | Karnten Steiermark                                     | 46,91699982 | 13,85700035   |
| TLMF Lep 0146f   | 658 | HQ96869f  | Geometridae | Ennominae   | Glacies coracina         | Esper                  | Habeler H                       | 11-Jul-2003 | Austria       |                           |                                               |                    | Steiernmark                                            | 47,2649993f | 14,3780002f   |
| BC ZSM Lep 15089 | 609 | JX034631  | Geometridae | Ennominae   | Gnophos obfuscata        | Denis & Schiffermüller | G Petranjy                      | 28-Jun-2008 | Italy         |                           |                                               |                    | Trentino-Alto AdigeSesvenna                            | 46,71670151 | 10,4499981    |
| BC ZSM Lep 2202f | 658 | GU68695f  | Geometridae | Ennominae   | Gnophos obfuscata        | Denis & Schiffermüller | U. Buchsbaur                    | 20-Aug-1996 | Germany       | Bavaria                   | Oberbayern                                    |                    | Wettersteingebirge, Kreuzel                            | 47,4500007f | 11,0666999f   |
| BC ZSM Lep 24055 | 658 | GU687337  | Geometridae | Ennominae   | Gnophos obfuscata        | Denis & Schiffermüller | A. Haslberger                   | 15-Jul-2007 | Germany       | Bavaria                   | Swaben                                        |                    | Oberstdorf, Edmund-Probst-Haus                         | 47,41289902 | 10,34850025   |
| BC ZSM Lep 2405f | 658 | GU68733f  | Geometridae | Ennominae   | Gnophos obfuscata        | Denis & Schiffermüller | A. Haslberger                   | 25-Jul-2001 | Germany       | Bavaria                   | Oberbayern                                    |                    | Berchtesgadener Lanc                                   |             |               |
| MM12885          | 658 | HM87542f  | Geometridae | Ennominae   | Gnophos obfuscata        | Denis & Schiffermüller | Marko Mutanen, Panu Vaelimael   |             | Finland       |                           |                                               |                    | Reiter Alm, Hirschswies                                | 60,0110015f | 22,4979991f   |
| MM15842          | 658 | HM87661f  | Geometridae | Ennominae   | Gnophos obfuscata        | Denis & Schiffermüller | Marko Mutaner                   | 27-Jul-2005 | Finland       |                           |                                               |                    | Dragsfjærd                                             | 59,7000012f | 22,3419990f   |
| MM1584f          | 658 | HM87661f  | Geometridae | Ennominae   | Gnophos obfuscata        | Denis & Schiffermüller | Marko Mutaner                   | 21-Jul-2004 | Finland       |                           |                                               |                    | Lohja                                                  | 60,1920013f | 23,7549991f   |
| TLMF Lep 00310   | 658 | HM42580f  | Geometridae | Ennominae   | Gnophos obfuscata        | Denis & Schiffermüller | Huemer P.                       | 16-Jul-2009 | Austria       |                           |                                               |                    | Marul, Lagutzbach, Beim alten Stafel                   | 47,20220184 | 9,928059578   |
| TLMF Lep 00417   | 658 | HM425900  | Geometridae | Ennominae   | Gnophos obfuscata        | Denis & Schiffermüller | Huemer P.                       | 23-Jul-2009 | Italy         |                           |                                               |                    | Colle Valcavera NE/ Demonte NW                         | 44,38439941 | 7,106389999   |
| TLMF Lep 01102   | 658 | HQ968469  | Geometridae | Ennominae   | Gnophos obfuscata        | Denis & Schiffermüller | Aistleitner U.                  | 20-Jul-2009 | Switzerland   |                           |                                               |                    | Tiefencastel S/ Salou, Got Grond                       | 46,85000153 | 9,597000122   |
| TLMF Lep 01973   | 658 | HQ968384  | Geometridae | Ennominae   | Gnophos obfuscata        | Denis & Schiffermüller | Huemer P.                       | 14-Jul-2010 | Italy         |                           |                                               |                    | NP Gran Sasso, Campo Imperatore, ex Miniera di Ligniti | 42,42670059 | 13,71329975   |
| TLMF Lep 0199f   | 658 | HQ96840f  | Geometridae | Ennominae   | Gnophos obfuscata        | Denis & Schiffermüller | Huemer P                        | 16-Jul-2010 | Italy         |                           |                                               |                    | Monte Terminillo I                                     | 42,4832992f | 13            |
| TLMF Lep 0246f   | 658 | JF880004f | Geometridae | Ennominae   | Gnophos obfuscata        | Denis & Schiffermüller | Huemer P                        | 19-Jul-2010 | Italy         |                           |                                               |                    | Ritten/ Obergruenwal                                   | 46,5970001f | 11,4390001f   |
| TLMF Lep 05547   | 658 | JX034678  | Geometridae | Ennominae   | Gnophos obfuscata        | Denis & Schiffermüller | Huemer P. & Tarmann G. M.       | 28-Jul-2011 | Macedonia     |                           |                                               |                    | Mavrovo NP, Korab, Korabska jezero, Kobolino polk      | 41,77799988 | 20,58200073   |
| TLMF Lep 05548   | 658 | JX034581  | Geometridae | Ennominae   | Gnophos obfuscata        | Denis & Schiffermüller | Huemer P. & Tarmann G. M.       | 28-Jul-2011 | Macedonia     |                           |                                               |                    | Mavrovo NP, Korab, Korabska jezero, Kobolino polk      | 41,77799988 | 20,58200073   |
| 07PROBE-1081f    | 658 | JX008174  | Gelechiidae | Gelechiinae | Gnorimoschema alaskense  | Povolny                | P.D.N. Heber                    | 23-Jul-2007 | Canada        | Manitoba                  | Churchill                                     |                    | 26 km SE Churchill, Twin Lake                          | 58,63000101 | -93,81900024  |
| CNCLPEP0006134f  | 658 | GU693677  | Gelechiidae | Gelechiinae | Gnorimoschema alaskense  | Povolny                | J.F. Landry                     | 23-Jun-1983 | Canada        | Saskatchewan              | Maichdstone                                   |                    | 55 km SE Lloydminster                                  | 53,0859985f | -109,295997f  |
| CNCLPEP0006138f  | 658 | GU69337f  | Gelechiidae | Gelechiinae | Gnorimoschema alaskense  | Povolny                | B.C. Schmidt                    | 03-Jul-2004 | Canada        | Yukon Territory           | N Whitehorse                                  |                    | Yukon Rd. at Takhini River                             | 60,8400001f | -135,19000024 |
| CNCLPEP0006138f  | 658 | GU69337f  | Gelechiidae | Gelechiinae | Gnorimoschema alaskense  | Povolny                | B.C. Schmidt                    | 03-Jul-2004 | Canada        | Yukon Territory           | N Whitehorse                                  |                    | Yukon Rd. at Takhini River                             | 60,8400001f | -135,19000024 |
| CNCLPEP00067547  | 658 | GU693492  | Gelechiidae | Gelechiinae | Gnorimoschema alaskense  | Povolny                | B. Landry                       | 12-Jul-1993 | United States | Colorado                  | Gilpin Co.                                    |                    | Roosevelt National Forest                              | 39,93999863 | -105,5100021  |
| MZH-LEP0000003   | 658 | HM37945f  | Gelechiidae | Gelechiinae | Gnorimoschema alaskense  | Povolny                | M. Ahola & L. Kaila             | 12-Jul-1994 | Canada        | Yukon Territory           | Camprgrounc                                   |                    |                                                        | 60,1860008f | -134,6970062  |
| POHL-10-0015f    | 658 | HQ257101f | Gelechiidae | Gelechiinae | Gnorimoschema alaskense  | Povolny                | Pohl, G. R. : Kutash, T         | 13-Jun-1995 | Canada        | Saskatchewan              |                                               |                    | vic. Big River                                         | 53,8199996f | -107,029998f  |
| POHL-10-00159    | 658 | HM887802  | Gelechiidae | Gelechiinae | Gnorimoschema alaskense  | Povolny                | Pohl, G. R.                     | 01-Jun-2006 | Canada        | Alberta                   | Strathcona County                             |                    | 8km southeast of Sherwood Park                         | 53,47800064 | -113,2289963  |
| POHL-10-00160    | 658 | HM887803  | Gelechiidae | Gelechiinae | Gnorimoschema alaskense  | Povolny                | Pohl, G. R.                     | 13-Jul-2002 | Canada        | Alberta                   | Strathcona County                             |                    | 8km southeast of Sherwood Park                         | 53,47800064 | -113,2289963  |
| POHL-10-00168    | 658 | HM887811  | Gelechiidae | Gelechiinae | Gnorimoschema alaskense  | Povolny                | Pohl, G. R.                     | 30-Jun-2008 | Canada        | Alberta                   | Strathcona County                             |                    | 8km southeast of Sherwood Park                         | 53,47800064 | -113,2289963  |
| MM06377          | 658 | HQ2570340 | Gelechiidae | Gelechiinae | Gnorimoschema valesiella | Staudinger             | Marko Mutanen, Anttoni Mutanen, | 29-Jun-2007 | Finland       |                           |                                               |                    | Lapponia inarensis                                     | 69,37599945 | 25,80500031   |
| MM14150          | 658 | HM875916  | Gelechiidae | Gelechiinae | Gnorimoschema valesiella | Staudinger             | Marko Mutanen, Nestori Mutanen, | 21-Jun-2009 | Finland       |                           |                                               |                    | Ostrobotnia kajajensis                                 | 64,33200073 | 28,59300041   |
| MM1563f          | 658 | HM87641f  | Gelechiidae | Gelechiinae | Gnorimoschema valesiell  | Staudinger             | Tomu Mutaner                    | 31-May-2002 | Finland       |                           |                                               |                    | Satakunda                                              | 60,9599990f | 22,3829994f   |
| TLMF Lep 01919   | 658 | HQ968331  | Gelechiidae | Gelechiinae | Gnorimoschema valesiella | Staudinger             | Huemer P.                       | 02-Aug-2010 | Italy         |                           |                                               |                    | Cuneo                                                  | 44,38140106 | 7,101669788   |
| 07PROBE-1068f    | 658 | JX008380  | Arctiidae   | Arctiinae   | Grammia quense           | Paykull                | P.D.N. Heber                    | 22-Jul-2007 | Canada        | Manitoba                  | Churchill                                     |                    | 23 km E Churchill, Ramsay Cree                         | 58,7300989f | -93,7799987f  |
| BC AB Lep 0004f  | 658 | HM91028f  | Arctiidae   | Arctiinae   | Grammia quense           | Paykull                | Rothache                        | 15-Jul-2006 | Switzerland   | Graubunder                | Tschiers                                      |                    | National park, Ofen-Pas                                | 46,8394004f | 10,2922000f   |
| BC AB Lep 00041  | 658 | HM91028f  | Arctiidae   | Arctiinae   | Grammia quense           | Paykull                | Rothache                        | 15-Jul-2006 | Switzerland   | Graubunder                | Tschiers                                      |                    | National park, Ofen-Pas                                | 46,8394004f | 10,2922000f   |
| BC AB Lep 00042  | 658 | HM91029f  | Arctiidae   | Arctiinae   | Grammia quense           | Paykull                | Rothache                        | 15-Jul-2006 | Switzerland   | Graubunder                | Tschiers                                      |                    | National park, Ofen-Pas                                | 46,8394004f | 10,2922000f   |
| CHU06-LEP-033    | 658 | JX008366  | Arctiidae   | Arctiinae   | Grammia quensell         | Paykull                | Arctic & Boreal Entomology      | 18-Aug-2006 | Canada        | Manitoba                  | Churchill                                     |                    | 16 km E Churchill, krummholz formation                 | 58,75400162 | -93,91300201  |
| LEP03195f        | 591 | JX008320  | Arctiidae   | Arctiinae   | Grammia quense           | Paykull                |                                 |             | United States | New Hampshire             | Mt Washington                                 |                    |                                                        |             |               |
| LEP037809        | 658 | JX008399  | Arctiidae   | Arctiinae   | Grammia quensell         | Paykull                | Jennifer Line                   |             | Canada        | Yukon Territory           | Mt. Klotz (SW. of ), dry Dryas slope          |                    |                                                        | 65,36499786 | -140,1829987  |
| LEP037926        | 648 | JX008198  | Arctiidae   | Arctiinae   | Grammia quensell         | Paykull                | Henny Hensel                    |             | Canada        | Quebec                    | Sunny Mtn., tundra 40 Km. NW of Schefferville |                    |                                                        |             |               |
| LEP038076        | 648 | JX008166  | Arctiidae   | Arctiinae   | Grammia quensell         | Paykull                | J. Troubridge                   |             | Canada        | Newfoundland and Labrador | Forteau                                       |                    |                                                        |             |               |
| LEP038077        | 658 | JX008356  | Arctiidae   | Arctiinae   | Grammia quensell         | Paykull                | J. Troubridge                   |             | Canada        | Newfoundland and Labrador | Forteau                                       |                    |                                                        |             |               |
| LEP041304        | 587 | JX008237  | Arctiidae   | Arctiinae   | Grammia quensell         | Paykull                |                                 |             | Canada        | Quebec                    | Schefferville, Bean Lake Tundra               |                    |                                                        |             |               |
| LEP04130f        | 639 | JX008258  | Arctiidae   | Arctiinae   | Grammia quense           | Paykull                |                                 |             | Canada        | Quebec                    | Schefferville, Sunny Mt                       |                    |                                                        |             |               |
| LEP04130f        | 587 | JX008321  | Arctiidae   | Arctiinae   | Grammia quense           | Paykull                |                                 |             | United States | New Hampshire             | Mt Washington                                 |                    |                                                        |             |               |
| MM10592          | 658 | HQ2570391 | Arctiidae   | Arctiinae   | Grammia quense           | Paykull                | Tomu Mutaner                    | 29-Jun-2003 | Finland       |                           |                                               |                    | Lapponia onontekiensis                                 | 68,9970016f | 20,7439994f   |
| MM1059f          | 658 | HQ2570392 | Arctiidae   | Arctiinae   | Grammia quense           | Paykull                | Marko Mutaner                   |             | Finland       |                           |                                               |                    | Lapponia onontekiensis                                 | 68,9970016f | 20,7439994f   |

|                            |     |          |               |                |                          |                |                                                 |             |             |                        |                                   |                                                 |                                                 |             |              |
|----------------------------|-----|----------|---------------|----------------|--------------------------|----------------|-------------------------------------------------|-------------|-------------|------------------------|-----------------------------------|-------------------------------------------------|-------------------------------------------------|-------------|--------------|
| MM10594                    | 658 | HQ570393 | Arctidae      | Arctiinae      | Grammia quense           | Paykull        | Marko Mutaner                                   | Finland     |             | Lapponia enontekiensis | Enontekiö                         | 68,99700166                                     | 20,74399946                                     |             |              |
| TLMF Lep 0203:             | 658 | HQ968441 | Arctidae      | Arctiinae      | Grammia quense           | Paykull        | Cerny K.                                        | 18-Jul-1996 | Switzerland | Graubunder             | Val Muestai                       | 46,54169846                                     | 10,43360043                                     |             |              |
| TLMF Lep 0203:             | 658 | HQ968442 | Arctidae      | Arctiinae      | Grammia quense           | Paykull        | Cerny K.                                        | 18-Sep-2008 | Austria     | Tyrol                  | Thurmtaler/ Sillian NV            | 46,7728004                                      | 12,38360022                                     |             |              |
| TLMF Lep 02735             | 658 | HQ34644  | Arctidae      | Arctiinae      | Grammia quensell         | Paykull        | Schmid J.                                       | 25-Jul-2009 | Switzerland | Graubunden             | Umg. Piz Minschuns, V. Costains   | 46,58100128                                     | 10,4829998                                      |             |              |
| 07PROBE-0052-09PROBE-0949: | 653 | JX008377 | Tortricidae   | Olethreutinae  | Grapholita aureolana:    | Tengström      | J.deWaard                                       | 13-Jul-2007 | Canada      | Manitoba               | Churchill                         | Town of Churchill                               | field S of Churchill train station              | 58,76699825 | -94,1760025  |
| MM00081                    | 658 | HM339636 | Tortricidae   | Olethreutinae  | Grapholita aureolana:    | Tengström      | Marko Mutaner                                   |             | Finland     |                        |                                   |                                                 | locality unconfirmed                            | 58,75799942 | -94,06800075 |
| MM04126                    | 658 | HM386916 | Tortricidae   | Olethreutinae  | Grapholita aureolana:    | Tengström      | Marko Mutaner                                   |             | Finland     |                        |                                   |                                                 | Enontekiö                                       | 68,99700166 | 20,74399946  |
| MM04146                    | 658 | HM386936 | Tortricidae   | Olethreutinae  | Grapholita aureolana:    | Tengström      | Marko Mutaner                                   |             | Finland     |                        |                                   |                                                 | Enontekiö                                       | 68,99700166 | 20,74399946  |
| MM06375                    | 658 | HQ570338 | Tortricidae   | Olethreutinae  | Grapholita aureolana     | Tengström      | Marko Mutanen, Anttoni Mutanen, Nestori Mutaner | 29-Jun-2007 | Finland     |                        | Lapponia inarensis                | Utsjoki                                         | Enontekiö                                       | 68,99700166 | 20,74399946  |
| TLMF Lep 0180:             | 585 | JX034608 | Tortricidae   | Olethreutinae  | Grapholita aureolana:    | Tengström      | Deutsch H.                                      | 02-Jul-1992 | Austria     | Tyrol                  | Osttirol                          | Glo.Grp., Dorfertal, Moar Aln                   | 47,03329846                                     | 12,62811004 |              |
| TLMF Lep 0180:             | 609 | HQ968276 | Tortricidae   | Olethreutinae  | Grapholita aureolana:    | Tengström      | Deutsch H.                                      | 02-Jul-1992 | Austria     | Tyrol                  | Osttirol                          | Glo.Grp., Dorfertal, Moar Aln                   | 47,03329846                                     | 12,62811004 |              |
| CNCNoctuoidea1362:         | 587 | JX034582 | Arctidae      | Arctiinae      | Holarctia cervin         | Fallou         | P. Muck                                         | 21-Jan-1982 | Austria     |                        |                                   | Otzteler Alpen Kreuzpitz                        |                                                 |             |              |
| CNCNoctuoidea1362:         | 370 | JX034676 | Arctidae      | Arctiinae      | Holarctia cervin         | Fallou         | P. Muck                                         | 21-Jan-1982 | Austria     |                        |                                   | Otzteler Alpen Kreuzpitz                        |                                                 |             |              |
| TLMF Lep 0289:             | 658 | JF860346 | Arctidae      | Arctiinae      | Holarctia cervin         | Fallou         | May B.                                          | 24-Jun-2008 | Switzerland | Valais                 |                                   | Zermatt / Gornergr                              |                                                 | 45,98500061 | 7,763999936  |
| CNCNoctuoidea1362:         | 591 | JX034597 | Arctidae      | Arctiinae      | Holarctia puenglelei     | Bang-Haas      | G. Palmqvist                                    | 10-Jul-1990 | Sweden      |                        |                                   |                                                 | Nissuntjårc                                     |             |              |
| MM19246                    | 658 | JF854550 | Arctidae      | Arctiinae      | Holarctia puenglelei     | Bang-Haas      | Timo Nupponen, Kari Nuppone                     | 07-Jul-2005 | Sweden      |                        | To                                |                                                 | Nissuntjårc                                     |             |              |
| MM19247                    | 658 | JF854551 | Arctidae      | Arctiinae      | Holarctia puenglelei     | Bang-Haas      | Timo Nupponen, Kari Nuppone                     | 07-Jul-2005 | Sweden      |                        | Regio                             |                                                 | Nissuntjårc                                     |             |              |
| MM17697                    | 658 | JX034589 | Blastobasidae |                | Hypatopa segnelli        | Zeller         | Erkki Laasonen, Leena Laasonen                  |             | Finland     |                        | South Tyro                        |                                                 | Nissuntjårc                                     |             |              |
| TLMF Lep 0226:             | 658 | JF859836 | Blastobasidae |                | Hypatopa segnelli        | Zeller         | Huemer P                                        | 22-Jul-2010 | Italy       |                        | South Tyro                        |                                                 | Nissuntjårc                                     |             |              |
| TLMF Lep 0226:             | 658 | JF859837 | Blastobasidae |                | Hypatopa segnelli        | Zeller         | Huemer P                                        | 22-Jul-2010 | Italy       |                        | South Tyro                        |                                                 | Nissuntjårc                                     |             |              |
| TLMF Lep 02731             | 658 | JF860256 | Blastobasidae |                | Hypatopa segnelli        | Zeller         | Schmid J.                                       | 22-Jul-2010 | Switzerland |                        | South Tyro                        |                                                 | Nissuntjårc                                     |             |              |
| MM00075                    | 658 | HM396256 | Prodoxidae    | Incurvariinae  | Incurvaria vetulella     | Zetterstedt    | Marko Mutaner                                   | 18-Jul-2008 | Finland     |                        | Graubunder                        | Ida/ Gastaneda                                  | Enontekiö                                       | 68,99700166 | 20,74399946  |
| MM0416C                    | 658 | HM386941 | Prodoxidae    | Incurvariinae  | Incurvaria vetulella     | Zetterstedt    | Marko Mutaner                                   |             | Finland     |                        |                                   |                                                 | Enontekiö                                       | 68,99700166 | 20,74399946  |
| MM0416E                    | 645 | HM386944 | Prodoxidae    | Incurvariinae  | Incurvaria vetulella     | Zetterstedt    | Marko Mutaner                                   |             | Finland     |                        |                                   |                                                 | Enontekiö                                       | 68,99700166 | 20,74399946  |
| MM08280                    | 658 | HM873845 | Prodoxidae    | Incurvariinae  | Incurvaria vetulella     | Zetterstedt    | Marko Mutanen                                   |             | Finland     |                        | Lapponia kemensis pars orientalis | Sodankyläe                                      | Enontekiö                                       | 68,16999817 | 27,09600067  |
| MM1385C                    | 658 | HM387061 | Prodoxidae    | Incurvariinae  | Incurvaria vetulella     | Zetterstedt    | M. Mutaner                                      |             | Finland     |                        |                                   | Sodankyläe                                      | Enontekiö                                       | 60,7159996  | 27,07299996  |
| TLMF Lep 0273:             | 658 | JF860257 | Prodoxidae    | Incurvariinae  | Incurvaria vetulella     | Zetterstedt    | Schmid J.                                       | 07-Jul-2010 | Switzerland |                        | Graubunder                        | Guralaetsch/ Val:                               | Enontekiö                                       | 46,55500031 | 9,126000404  |
| TLMF Lep 0277:             | 512 | JX034629 | Prodoxidae    | Incurvariinae  | Incurvaria vetulella     | Zetterstedt    | Huemer P.                                       | 14-Jul-1993 | Austria     |                        | Tyrol                             | Nordtirol                                       | Kuehta                                          | 47,2140007  | 11,02600002  |
| TLMF Lep 02794             | 658 | JF860292 | Prodoxidae    | Incurvariinae  | Incurvaria vetulella     | Zetterstedt    | Deutsch H.                                      | 17-Jul-2004 | Austria     |                        | Tyrol                             | Osttirol, Lienzer Dolomiten                     | Insteinalm/ Lienz SE                            | 46,77500153 | 12,79199982  |
| MM00490                    | 658 | HM871032 | Yponomeutidae |                | Kessleria fasciapennella | Stainton       | Marko Mutanen                                   | 22-May-2006 | Finland     |                        |                                   | Ostrobothnia borealis pars australis            | Kiiminki                                        | 65,07099915 | 25,72500038  |
| MM00865                    | 658 | HM871227 | Yponomeutidae |                | Kessleria fasciapennella | Stainton       | Marko Mutanen                                   |             | Finland     |                        |                                   | Ostrobothnia borealis pars australis            | Kiiminki                                        | 65,07099915 | 25,72500038  |
| MM06404                    | 658 | HM873232 | Yponomeutidae |                | Kessleria fasciapennella | Stainton       | Marko Mutanen, Nestori Mutanen                  | 09-Jun-2007 | Finland     |                        |                                   | Regio kuusamoensis                              | Kuusamo                                         | 66,37599945 | 29,41500092  |
| TLMF Lep 01871             | 658 | JF859608 | Yponomeutidae |                | Kessleria fasciapennella | Stainton       | Tarmann G.                                      | 31-Aug-1991 | Austria     | Tyrol                  | Osttirol, Teischnitztal           | Teischnitztal/ Talausgang S (linker 47,02999878 | 12,63800967                                     |             |              |
| TLMF Lep 01872             | 658 | JF859609 | Yponomeutidae |                | Kessleria fasciapennella | Stainton       | Tarmann G.                                      | 31-Aug-1991 | Austria     | Tyrol                  | Osttirol, Teischnitztal           | Talhang'                                        | Teischnitztal/ Talausgang S (linker 47,02999878 | 12,63800967 |              |
| TLMF Lep 01873             | 658 | JF859610 | Yponomeutidae |                | Kessleria fasciapennella | Stainton       | Tarmann G.                                      | 31-Aug-1991 | Austria     | Tyrol                  | Osttirol, Teischnitztal           | Teischnitztal/ Talausgang S (linker 47,02999878 | 12,63800967                                     |             |              |
| TLMF Lep 01874             | 658 | JF859611 | Yponomeutidae |                | Kessleria fasciapennella | Stainton       | Tarmann G.                                      | 31-Aug-1991 | Austria     | Tyrol                  | Osttirol, Teischnitztal           | Talhang'                                        | Teischnitztal/ Talausgang S (linker 47,02999878 | 12,63800967 |              |
| MM07022                    | 658 | HM873637 | Prodoxidae    | Incurvariinae  | Lampronia standfussiella | Zeller         | Tommi Mutanen                                   | 18-Jun-2005 | Finland     |                        |                                   | Ostrobothnia borealis pars australis            | Rovaniemi                                       | 66,41999817 | 26,32799911  |
| MM15518                    | 658 | HM876315 | Prodoxidae    | Incurvariinae  | Lampronia standfussiella | Zeller         | Tommi Mutanen                                   | 18-Jun-2005 | Finland     |                        |                                   | Ostrobothnia borealis pars borealis             | Rovaniemi mlk                                   | 66,50499725 | 25,65200043  |
| MM18068                    | 658 | JF854100 | Prodoxidae    | Incurvariinae  | Lampronia standfussiella | Zeller         | Marko Mutanen                                   | 17-Jun-1999 | Finland     |                        |                                   | Ostrobothnia borealis pars australis            | Oulu                                            | 64,97899828 | 25,51729965  |
| TLMF Lep 02738             | 658 | JF860258 | Prodoxidae    | Incurvariinae  | Lampronia standfussiella | Zeller         | Schmid J.                                       | 08-Jul-2009 | Switzerland |                        | Graubunden                        | Laegh da l' Albigna, Val Bregaglia              | 46,3370018                                      | 9,642999649 |              |
| TLMF Lep 02781             | 658 | JF860288 | Prodoxidae    | Incurvariinae  | Lampronia standfussiell  | Zeller         | Huemer P                                        | 27-Jun-1987 | Italy       | Lombardy               | Giudicarie                        | Monte Triemalz                                  | 45,8409996                                      | 10,69999981 |              |
| BC ZSM Lep 2413:           | 658 | GU687262 | Geometridae   | Larentiinae    | Lampropteryx oregiata:   | Metcalfe       | A. Haslberger                                   | 25-May-2003 | Germany     | Bavaria                | Oberbayern                        | Ruhpolding, Roethelmc                           |                                                 | 45,8409996  | 10,69999981  |
| BC ZSM Lep 2497:           | 658 | GU654947 | Geometridae   | Larentiinae    | Lampropteryx oregiata:   | Metcalfe       | Dr. Theo Gruenewald                             | 23-May-2009 | Germany     | Bavaria                | Niederbayern                      | Kroening, Oberschichtenkofe                     |                                                 | 48,5530014  | 12,38399982  |
| BC ZSM Lep 3747:           | 658 | HQ256300 | Geometridae   | Larentiinae    | Lampropteryx oregiata:   | Metcalfe       | Dr. Andreas H. Segerer                          | 15-Aug-2005 | Germany     | Bavaria                | Niederbayern                      | Wiesenfelden, Hoehenber                         |                                                 | 49,40449844 | 12,49730015  |
| MM01446                    | 658 | HM386734 | Geometridae   | Larentiinae    | Lampropteryx oregiata:   | Metcalfe       | Marko Mutanen, Panu Vaelimael                   |             | Finland     |                        |                                   | Imatra                                          | 61,10800171                                     | 28,79899975 |              |
| MM01476                    | 658 | HM386752 | Geometridae   | Larentiinae    | Lampropteryx oregiata:   | Metcalfe       | Marko Mutanen, Panu Vaelimael                   |             | Finland     |                        |                                   | Imatra                                          | 61,10800171                                     | 28,79899975 |              |
| MM01476                    | 658 | HM386754 | Geometridae   | Larentiinae    | Lampropteryx oregiata:   | Metcalfe       | Marko Mutanen, Panu Vaelimael                   |             | Finland     |                        |                                   | Imatra                                          | 61,10800171                                     | 28,79899975 |              |
| MM02883                    | 658 | HM871736 | Geometridae   | Larentiinae    | Lampropteryx oregiata:   | Metcalfe       | Marko Mutanen                                   |             | Finland     |                        |                                   | Kiminki                                         | 65,07099915                                     | 25,72500038 |              |
| MM14765                    | 658 | HM876251 | Elachistidae  | Depressariinae | Levipalpus hepatoriell   | Lienig & Zelle | Petri Hirvoner                                  | 01-Aug-2005 | Finland     |                        |                                   | Imatra                                          | 61,20600128                                     | 28,86000061 |              |
| MM1477C                    | 658 | HM876252 | Elachistidae  | Depressariinae | Levipalpus hepatoriell   | Lienig & Zelle | Petri Hirvoner                                  | 01-Aug-2005 | Finland     |                        |                                   | Imatra                                          | 61,20600128                                     | 28,86000061 |              |
| MM17543                    | 658 | JX034617 | Elachistidae  | Depressariinae | Levipalpus hepatoriell   | Lienig & Zelle | Juhani Itäemies                                 |             | Finland     |                        |                                   | Kuusamc                                         | 66,36799622                                     | 29,30200005 |              |
| TLMF Lep 0273:             | 658 | JF860259 | Elachistidae  | Depressariinae | Levipalpus hepatoriell   | Lienig & Zelle | Schmid J.                                       | 22-Aug-2010 | Switzerland |                        | Graubunder                        | Lagal:                                          | 46,43600082                                     | 9,987000462 |              |
| TLMF Lep 0371:             | 658 | JX266866 | Elachistidae  | Depressariinae | Levipalpus hepatoriell   | Lienig & Zelle | Erlebach S.                                     | 16-Aug-1993 | Austria     |                        |                                   | Walchen/ Hintertux NV                           | 47,20830154                                     | 11,62510014 |              |
| TLMF Lep 0479:             | 658 | JX034570 | Elachistidae  | Depressariinae | Levipalpus hepatoriell   | Lienig & Zelle | Sonderegger P                                   | 09-Sep-2008 | Switzerland |                        | Valais                            | Fully, Lousin                                   | 66,17699814                                     | 7,127850056 |              |
| BC ZSM Lep 2424:           | 658 | GU687173 | Geometridae   | Ennominae      | Macaria fusca            | Thunberg       | A. Haslberger                                   | 12-Aug-2000 | Austria     | Karnten                | Lappl                             | Grossglockner, Obernassfel                      | 47,11809921                                     | 12,82759955 |              |
| MM0342C                    | 658 | HQ570296 | Geometridae   | Ennominae      | Macaria fusca            | Thunberg       | Marko Mutaner                                   |             | Finland     |                        | Lapponia enontekiensis            | Enontekiö                                       | 68,99700166                                     | 20,74399946 |              |
| MM14587                    | 658 | HM876177 | Geometridae   | Ennominae      | Macaria fusca            | Thunberg       | Marko Mutaner                                   |             | Finland     |                        | Lapponia enontekiensis            | Enontekiö                                       | 69,03000354                                     | 21,10199922 |              |
| MM18508                    | 658 | JF854375 | Geometridae   | Ennominae      | Macaria fusca            | Thunberg       | Marko Mutanen, Nestori Mutanen, Anttoni Mutaner | 11-Jul-2010 | Finland     |                        | Lapponia inarensis                | Utsjoki                                         | 69,37689972                                     | 25,98279953 |              |
| TLMF Lep 00449             | 658 | HM425925 | Geometridae   | Ennominae      | Macaria fusca            | Thunberg       | Huemer P.                                       | 25-Jul-2009 | France      |                        | Provence-Alpes-Cote d'Azur        | Col de la Moutiere W/ W St.                     | 44,32030106                                     | 6,795559883 |              |
| TLMF Lep 00450             | 658 | HM425926 | Geometridae   | Ennominae      | Macaria fusca            | Thunberg       | Huemer P.                                       | 25-Jul-2009 | France      |                        | Provence-Alpes-Cote d'Azur        | Dalmas le Selvaq                                | 44,32030106                                     | 6,795559883 |              |
| TLMF Lep 0274:             | 658 | JF860260 | Geometridae   | Ennominae      | Macaria fusca            | Thunberg       | Schmid J.                                       | 07-Aug-2005 | Switzerland |                        | Graubunder                        | Vorab pign, Grat/ Laa:                          | 46,81000006                                     | 9,166000366 |              |
| TLMF Lep 0290:             | 658 | JF860360 | Geometridae   | Ennominae      | Macaria fusca            | Thunberg       | Mayr T.                                         | 22-Jul-2010 | Switzerland |                        | Graubunder                        | Alpe Plavna/ Taras:                             | 46,70000076                                     | 10,25       |              |
| TLMF Lep 02910             | 658 | JX034584 | Geometridae   | Ennominae      | Macaria fusca            | Thunberg       | Huemer P.                                       | 04-Aug-2010 | France      |                        | Provence-Alpes-Cote d'Azur        | Col Agnel                                       | 44,68899918                                     | 6,984000206 |              |
| TLMF Lep 02911             | 658 | JX034602 | Geometridae   | Ennominae      | Macaria fusca            | Thunberg       | Huemer P.                                       | 04-Aug-2010 | France      |                        | Provence-Alpes-Cote d'Azur        | Col Agnel                                       | 44,68899918                                     | 6,984000206 |              |
| TLMF Lep 05524             | 658 | JX034625 | Geometridae   | Ennominae      | Macaria fusca            | Thunberg       | Huemer P. & Tarmann G. M.                       | 28-Jul-2011 | Macedonia   |                        |                                   | Mavrovo NP, Korab, summit ridge                 | 41,78900146                                     | 20,54700089 |              |

genitalia on card box

|                              |     |          |               |               |                             |                  |                                                                |             |             |                            |            |                      |                                            |              |              |
|------------------------------|-----|----------|---------------|---------------|-----------------------------|------------------|----------------------------------------------------------------|-------------|-------------|----------------------------|------------|----------------------|--------------------------------------------|--------------|--------------|
| TLMF Lep 05525               | 658 | JX034658 | Geometridae   | Ennominae     | Macaria fusca               | Thunberg         | Huemer P. & Tarmann G. M.                                      | 28-Jul-2011 | Macedonia   |                            |            |                      | Mavrovo NP, Korab, summit ridge            | 41,78900174  | 20,54700089  |
| BC ZSM Lep 24200             | 658 | GU687203 | Geometridae   | Larentinae    | Martania taeniata           | Stephens         | A. Haslberger                                                  | 13-Jul-2005 | Germany     | Bavaria                    | Oberbayern | Berchtesgadener Land | Ramsau bei Berchtesgaden,                  | 47,58060074  | 12,81550026  |
| MM01446                      | 658 | HM386731 | Geometridae   | Larentinae    | Martania taeniata           | Stephens         | Marko Mutanen, Panu Vaelimael                                  |             | Finland     |                            |            |                      | Klausbachta                                | 61,10800171  | 28,79899975  |
| MM01764                      | 647 | HM87089E | Geometridae   | Larentinae    | Martania taeniata           | Stephens         | Marko Mutanen, Panu Vaelimael                                  |             | Finland     |                            |            |                      | Imatra                                     | 61,10800171  | 28,79899975  |
| MM08468                      | 658 | HM873926 | Geometridae   | Larentinae    | Martania taeniata           | Stephens         | Marko Mutanen, Panu Vaelimaeki                                 |             | Finland     |                            |            |                      | Kolari                                     | 67,27600098  | 23,75300026  |
| MM10552                      | 658 | HM874804 | Crambidae     | Odontiinae    | Metaxmeste schrankiana      | Hochenwarth      | Marko Mutanen                                                  | 27-May-2002 | Finland     |                            |            |                      | Utajavaervi                                | 65,04199982  | 23,81399918  |
| MM10553                      | 658 | HM874805 | Crambidae     | Odontiinae    | Metaxmeste schrankiana      | Hochenwarth      | Marko Mutanen                                                  | 27-May-2002 | Finland     |                            |            |                      | Utajavaervi                                | 65,04199982  | 23,81399918  |
| MM13925                      | 658 | HM875799 | Crambidae     | Odontiinae    | Metaxmeste schrankiana      | Hochenwarth      | Marko Mutanen, Nestori Mutanen, Anttoni Mutanen                | 30-May-2009 | Finland     |                            |            |                      | Kiminki                                    | 65,07099915  | 25,72500038  |
| MM1880C                      | 658 | JF854629 | Crambidae     | Odontiinae    | Metaxmeste schrankian       | Hochenwarth      | Reima Leinonen                                                 | 03-Jun-2007 | Finland     |                            |            |                      | Suomussalmi                                | 65,02200031  | 29,33399962  |
| TLMF Lep 01775               | 658 | HQ968975 | Crambidae     | Odontiinae    | Metaxmeste schrankiana      | Hochenwarth      | Huemer P.                                                      | 01-Jul-2008 | France      | Provence-Alpes-Cote d'Azur |            |                      | Mont Chajol SE-Seite/ CastUrino            | E44,09590149 | 7,533609867  |
| TLMF Lep 01776               | 641 | HQ968976 | Crambidae     | Odontiinae    | Metaxmeste schrankiana      | Hochenwarth      | Huemer P.                                                      | 07-May-2008 | Italy       |                            |            |                      | Gias del Chio/ Palanfr SW                  | 44,19499969  | 7,489719868  |
| TLMF Lep 0178:               | 658 | HQ96898E | Crambidae     | Odontiinae    | Metaxmeste schrankian       | Hochenwarth      | Erlebach S.                                                    | 29-Jul-2004 | Austria     | Tyrol                      |            |                      | Langer Sattel/ Innsbruck NW                | 47,31069946  | 11,35879992  |
| TLMF Lep 01793               | 658 | HQ968992 | Crambidae     | Odontiinae    | Metaxmeste schrankiana      | Hochenwarth      | Huemer P.                                                      | 01-Jul-2008 | France      | Provence-Alpes-Cote d'Azur |            |                      | Mont Chajol SE-Seite/ CastUrino            | E44,09590149 | 7,533609867  |
| TLMF Lep 0274: 07PROBE-00535 | 658 | JF860262 | Crambidae     | Odontiinae    | Metaxmeste schrankian       | Hochenwarth      | Schmid J.                                                      | 27-Jul-2007 | Switzerland |                            |            |                      | Val de la Pragnola/ Averb                  | 46,36999892  | 9,50399971   |
|                              | 653 | XJ008403 | Gelechiidae   | Gelechiinae   | Neofaculta infernella       | Herrich-Schäffer | J.deWaard                                                      | 15-Jul-2007 | Canada      |                            | Churhill   |                      | 16 km E Churchill, Bird Cove, Rock Bluff C | 58,76499939  | -93,86499786 |
| 07PROBE-1083: 07PROBE-1083:  | 658 | XJ008139 | Gelechiidae   | Gelechiinae   | Neofaculta infernell:       | Herrich-Schäffer | P.D.N. Heber                                                   | 23-Jul-2007 | Canada      | Manitoba                   | Churhill   |                      | 26 km SE Churchill, Twin Lake              | 58,63000107  | -93,81900024 |
| MM0232:                      | 658 | XJ008290 | Gelechiidae   | Gelechiinae   | Neofaculta infernell:       | Herrich-Schäffer | P.D.N. Heber                                                   | 23-Jul-2007 | Canada      | Manitoba                   | Churhill   |                      | 26 km SE Churchill, Twin Lake              | 58,63000107  | -93,81900024 |
| MM03437                      | 626 | HM87148E | Gelechiidae   | Gelechiinae   | Neofaculta infernell:       | Herrich-Schäffer | Marko Mutanen, Panu Vaelimael                                  |             | Finland     |                            |            |                      | Imatra                                     | 61,10800171  | 28,79899975  |
| MM04223                      | 658 | HQ57030C | Gelechiidae   | Gelechiinae   | Neofaculta infernell:       | Herrich-Schäffer | Marko Mutanen                                                  |             | Finland     | Lappi                      |            |                      | Enontekiö                                  | 68,9970016E  | 20,7439994E  |
|                              | 658 | HM872338 | Gelechiidae   | Gelechiinae   | Neofaculta infernella       | Herrich-Schäffer | Marko Mutanen                                                  | 13-Jun-2006 | Finland     |                            |            |                      | Parikkala                                  | 61,50799942  | 29,5739994   |
| MM05472                      | 658 | HM872844 | Gelechiidae   | Gelechiinae   | Neofaculta infernella       | Herrich-Schäffer | Marko Mutanen, Nestori Mutanen, Anttoni Mutanen                | 04-Jun-2007 | Finland     |                            |            |                      | Kiminki                                    | 65,07099915  | 25,72500038  |
| MM09025                      | 658 | JX034600 | Gelechiidae   | Gelechiinae   | Neofaculta infernell:       | Herrich-Schäffer | Marko Mutanen, Panu Vaelimael                                  |             | Finland     |                            |            |                      | Simple                                     | 61,42300034  | 29,3229999E  |
| MM13507                      | 655 | HM87562E | Gelechiidae   | Gelechiinae   | Neofaculta infernell:       | Herrich-Schäffer | Marko Mutanen, Panu Vaelimael                                  |             | Finland     |                            |            |                      | Dragsfjærd                                 | 60,0110015E  | 22,4979991E  |
| MM13508                      | 658 | JX034649 | Gelechiidae   | Gelechiinae   | Neofaculta infernell:       | Herrich-Schäffer | Marko Mutanen, Panu Vaelimael                                  |             | Finland     |                            |            |                      | Dragsfjærd                                 | 60,0110015E  | 22,4979991E  |
| MM1790E                      | 658 | JX034666 | Gelechiidae   | Gelechiinae   | Neofaculta infernell:       | Herrich-Schäffer | Ali Karhu                                                      |             | Finland     |                            |            |                      | Karelia borealis                           | 62,5485992E  | 29,09910011  |
| MM17907                      | 658 | JX034662 | Gelechiidae   | Gelechiinae   | Neofaculta infernell:       | Herrich-Schäffer | Ali Karhu                                                      |             | Finland     |                            |            |                      | Liperi                                     | 62,5485992E  | 29,09910011  |
| MM1790E                      | 637 | XJ034580 | Gelechiidae   | Gelechiinae   | Neofaculta infernell:       | Herrich-Schäffer | Ali Karhu                                                      |             | Finland     |                            |            |                      | Karelia borealis                           | 62,5485992E  | 29,09910011  |
| MM18249                      | 658 | JF854242 | Gelechiidae   | Gelechiinae   | Neofaculta infernella       | Herrich-Schäffer | Marko Mutanen, Nestori Mutanen, Anttoni Mutanen                | 18-Jun-2010 | Finland     |                            |            |                      | Savonia australis                          | 61,05490112  | 28,72179985  |
| MM1825C                      | 658 | JF854243 | Gelechiidae   | Gelechiinae   | Neofaculta infernell:       | Herrich-Schäffer | Tommi Mutanen                                                  | 19-Jun-2004 | Finland     |                            |            |                      | Ostrobothnia kajaniensi                    | 64,2675018E  | 21,8789994E  |
| MM18251                      | 658 | JF854244 | Gelechiidae   | Gelechiinae   | Neofaculta infernella       | Herrich-Schäffer | Marko Mutanen, Nestori Mutanen, Anttoni Mutanen                | 08-Jul-2010 | Finland     |                            |            |                      | Lapponia inarenis                          | 69,82800293  | 27           |
| MM1960C                      | 658 | JN270928 | Gelechiidae   | Gelechiinae   | Neofaculta infernell:       | Herrich-Schäffer | H. Hendriksser                                                 | 05-Jul-1994 | Denmark     |                            |            |                      | Danner høj                                 |              |              |
| TLMF Lep 00545               | 657 | HM381388 | Gelechiidae   | Gelechiinae   | Neofaculta infernella       | Herrich-Schäffer | Huemer P.                                                      | 13-Jul-2009 | Austria     | Karnten                    | Jylland    |                      | Petzen N, Umg. Gh. Siebenhuetten           | 46,51819992  | 14,77350044  |
| TLMF Lep 00592               | 658 | HM381434 | Gelechiidae   | Gelechiinae   | Neofaculta infernella       | Herrich-Schäffer | Huemer P.                                                      | 20-Jul-2009 | Italy       |                            |            |                      | Belluno                                    | 46,5223999   | 12,00699997  |
| TLMF Lep 0083:               | 657 | HQ96820E | Gelechiidae   | Gelechiinae   | Neofaculta infernell:       | Herrich-Schäffer | Huemer P.                                                      | 01-Jul-2006 | Austria     | Karnten                    |            |                      | Passo di Valparola E - Passo               | 46,5223999   | 12,00699997  |
| TLMF Lep 00867               | 658 | HQ968241 | Gelechiidae   | Gelechiinae   | Neofaculta infernella       | Herrich-Schäffer | Huemer P.                                                      | 20-Jun-2008 | Austria     | Vorarlberg                 |            |                      | Falzaregg Umg. Zollarsehueett              | 46,8059989E  | 13,0710001   |
| TLMF Lep 00913               | 658 | HM381485 | Gelechiidae   | Gelechiinae   | Neofaculta infernella       | Herrich-Schäffer | Huemer P.                                                      | 29-May-2009 | Austria     | Vorarlberg                 |            |                      | Sonntag, Buchboden, NW Bad Rotenbrunner    | 47,24499893  | 9,370999718  |
| TLMF Lep 0206:               | 658 | JF859652 | Gelechiidae   | Gelechiinae   | Neofaculta infernell:       | Herrich-Schäffer | Huemer P.                                                      | 01-Jul-2010 | Italy       | South Tyro                 |            |                      | Ritten/ Obergruenwal                       | 46,59700014  | 11,4390001E  |
| TLMF Lep 0216:               | 615 | JF859751 | Gelechiidae   | Gelechiinae   | Neofaculta infernell:       | Herrich-Schäffer | Huemer P.                                                      | 04-Jun-2010 | Italy       | South Tyro                 |            |                      | Montigg/ Kleiner Pric                      | 46,4280014   | 11,3000001E  |
| TLMF Lep 0221:               | 658 | JF859800 | Gelechiidae   | Gelechiinae   | Neofaculta infernell:       | Herrich-Schäffer | Huemer P.                                                      | 22-Jul-2010 | Italy       | South Tyro                 |            |                      | Montigg/ Kleiner Pric                      | 46,4280014   | 11,3000001E  |
| TLMF Lep 0225:               | 658 | JF859830 | Gelechiidae   | Gelechiinae   | Neofaculta infernell:       | Herrich-Schäffer | Huemer P.                                                      | 30-Jun-2010 | Italy       | South Tyro                 |            |                      | Montigg/ Kleiner Pric                      | 46,4280014   | 11,3000001E  |
| TLMF Lep 0274:               | 627 | JF860264 | Gelechiidae   | Gelechiinae   | Neofaculta infernell:       | Herrich-Schäffer | Schmid J.                                                      | 22-Jun-2005 | Switzerland | Graubunder                 |            |                      | Riefawald/ Val:                            | 46,6180000E  | 9,194000244  |
| TLMF Lep 0043:               | 658 | HM425911 | Nymphalidae   | Satyrinae     | Oeneis glacialis            | Mol              | Huemer P.                                                      | 23-Jul-2006 | Italy       |                            |            |                      | Cuneo                                      | 44,3767013E  | 7,13667011E  |
| TLMF Lep 01087               | 658 | HQ968455 | Nymphalidae   | Satyrinae     | Oeneis glacialis            | Mol              | Alestitner U.                                                  | 13-Jun-2009 | Switzerland | Graubunden                 |            |                      | Gias Valcavera/ Demonte NV                 | 44,365000153 | 9,597000122  |
| MM00092                      | 658 | HM396371 | Nymphalidae   | Satyrinae     | Oeneis nomis                | Thunberg         | Marko Mutanen                                                  |             | Finland     |                            |            |                      | Enontekiö                                  | 68,9970016E  | 20,7439994E  |
| MM03405                      | 658 | HQ570284 | Nymphalidae   | Satyrinae     | Oeneis nomis                | Thunberg         | Marko Mutanen                                                  |             | Finland     |                            |            |                      | Enontekiö                                  | 68,9970016E  | 20,7439994E  |
| MM0409E                      | 658 | HM38688E | Nymphalidae   | Satyrinae     | Oeneis nomis                | Thunberg         | Marko Mutanen                                                  |             | Finland     | Lappi                      |            |                      | Enontekiö                                  | 68,9970016E  | 20,7439994E  |
| MM06393                      | 658 | HM873225 | Pterophoridae | Pterophorinae | Oidaematophorus rogenhoferi | Mann             | Marko Mutanen, Panu Vaelimaeki, Jani Raitanen, Heikki Poeykkoe |             | Finland     |                            |            |                      | Tornio                                     | 65,85099792  | 24,35000038  |
| MM06582                      | 658 | HM873344 | Pterophoridae | Pterophorinae | Oidaematophorus rogenhoferi | Mann             | Marko Mutanen, Panu Vaelimaeki, Heikki Poeykkoe                |             | Finland     |                            |            |                      | Tornio                                     | 65,85099792  | 24,35000038  |
| MM06583                      | 658 | HM873345 | Pterophoridae | Pterophorinae | Oidaematophorus rogenhoferi | Mann             | Marko Mutanen, Panu Vaelimaeki, Heikki Poeykkoe                |             | Finland     |                            |            |                      | Tornio                                     | 65,85099792  | 24,35000038  |
| TLMF Lep 00578               | 658 | HM381420 | Pterophoridae | Pterophorinae | Oidaematophorus rogenhoferi | Mann             | Huemer P.                                                      | 20-Jul-2009 | Italy       |                            |            |                      | Belluno                                    | 46,5223999   | 12,00699997  |
| TLMF Lep 0171:               | 658 | HQ96891E | Pterophoridae | Pterophorinae | Oidaematophorus rogenhofe   | Mann             | Huemer P.                                                      | 09-Aug-2010 | Slovenia    |                            |            |                      | Passo di Valparola E - Passo               | 46,5223999   | 12,00699997  |
| TLMF Lep 0171:               | 658 | HQ96892E | Pterophoridae | Pterophorinae | Oidaematophorus rogenhofe   | Mann             | Huemer P.                                                      | 09-Aug-2010 | Slovenia    |                            |            |                      | Falzaregg                                  | 46,4384994E  | 13,6352996E  |
| TLMF Lep 0274:               | 658 | JF860265 | Pterophoridae | Pterophorinae | Oidaematophorus rogenhofe   | Mann             | Schmid J.                                                      | 04-Aug-2005 | Switzerland | Graubunder                 |            |                      | Veliki Mangar                              | 46,4280014   | 11,3000001E  |
| 09PROBE-0946:                | 658 | HM37572: | Tortricidae   | Olethreutinae | Olethreutes schulziana      | Fabricius        | P.D.N. Hebert                                                  | 26-Jul-2009 | Canada      | Manitoba                   | Churhill   |                      | 26 km SE Churchill, Twin Lakes burn site   | 58,61999893  | -93,83000183 |
| 09PROBE-0947:                | 658 | HM37572: | Tortricidae   | Olethreutinae | Olethreutes schulziana      | Fabricius        | P.D.N. Heber                                                   | 28-Jul-2005 | Canada      | Manitoba                   | Churhill   |                      | 16 km E Churchill, tundra pond             | 58,75500107  | -93,91500092 |
| MM03787                      | 658 | HM872147 | Tortricidae   | Olethreutinae | Olethreutes schulziana      | Fabricius        | Marko Mutanen                                                  | 29-Jun-2006 | Finland     |                            |            |                      | Ostrobothnia borealis pars australis       | 64,98100281  | 25,72900009  |
| MM0411E                      | 658 | HM38690: | Tortricidae   | Olethreutinae | Olethreutes schulziana      | Fabricius        | Marko Mutanen                                                  |             | Finland     |                            |            |                      | Enontekiö                                  | 68,9970016E  | 20,7439994E  |
| MM0411E                      | 658 | HM38690E | Tortricidae   | Olethreutinae | Olethreutes schulziana      | Fabricius        | Marko Mutanen                                                  |             | Finland     |                            |            |                      | Enontekiö                                  | 68,9970016E  | 20,7439994E  |
| MM0412C                      | 658 | HM38690E | Tortricidae   | Olethreutinae | Olethreutes schulziana      | Fabricius        | Marko Mutanen                                                  |             | Finland     |                            |            |                      | Enontekiö                                  | 68,9970016E  | 20,7439994E  |
| MM06203                      | 658 | HM87311E | Tortricidae   | Olethreutinae | Olethreutes schulziana      | Fabricius        | Marko Mutanen, Tomi Mutanen                                    | 16-Jun-2007 | Finland     |                            |            |                      | Karelia borealis                           | 61,7929992E  | 29,71100044  |
| MM06286                      | 658 | HM873172 | Tortricidae   | Olethreutinae | Olethreutes schulziana      | Fabricius        | Marko Mutanen, Nestori Mutanen, Anttoni Mutanen                | 27-Jun-2007 | Finland     |                            |            |                      | Lapponia kemensis pars orientalis          | 68,22299957  | 27,21699905  |

|                  |     |          |              |               |                          |                  |                                                 |             |             |            |                                                    |                                                    |             |              |
|------------------|-----|----------|--------------|---------------|--------------------------|------------------|-------------------------------------------------|-------------|-------------|------------|----------------------------------------------------|----------------------------------------------------|-------------|--------------|
| MM06311          | 658 | HM873193 | Tortricidae  | Olethreutinae | Olethreutes schulziana   | Fabricius        | Marko Mutanen, Anttoni Mutanen, Nestori Mutaner | 28-Jun-2006 | Finland     |            | Lapponia inarenensis                               | Inari                                              | 68,4469986  | 27,41399956  |
| MM06351          | 658 | HM873219 | Tortricidae  | Olethreutinae | Olethreutes schulziana   | Fabricius        | Marko Mutanen, Anttoni Mutanen, Nestori Mutaner | 29-Jun-2007 | Finland     |            | Lapponia inarenensis                               | Utsjoki                                            | 69,89099884 | 27,07799911  |
| MM08474          | 658 | JX034686 | Tortricidae  | Olethreutinae | Olethreutes schulziana   | Fabricius        | Marko Mutanen, Panu Vaelimaeki                  |             | Finland     |            | Lapponia kemensis pars occidentalis                | Kolari                                             | 67,27600098 | 23,75300026  |
| MM08475          | 658 | JX034661 | Tortricidae  | Olethreutinae | Olethreutes schulziana   | Fabricius        | Marko Mutanen, Panu Vaelimaeki                  |             | Finland     |            | Lapponia kemensis pars occidentalis                | Kolari                                             | 67,27600098 | 23,75300026  |
| MM14581          | 658 | JX034593 | Tortricidae  | Olethreutinae | Olethreutes schulzian    | Fabricius        | Marko Mutaner                                   |             | Finland     |            | Lapponia enontekiensis                             | Enontekiö                                          | 69,0630035  | 21,10199928  |
| MM14582          | 658 | JX034636 | Tortricidae  | Olethreutinae | Olethreutes schulzian    | Fabricius        | Marko Mutaner                                   |             | Finland     |            | Lapponia enontekiensis                             | Enontekiö                                          | 69,0630035  | 21,10199928  |
| MM18289          | 658 | JF854277 | Tortricidae  | Olethreutinae | Olethreutes schulziana   | Fabricius        | Marko Mutanen, Nestori Mutanen, Anttoni Mutaner | 08-Jul-2010 | Finland     |            | Lapponia inarenensis                               | Utsjoki                                            | 69,82800293 | 27           |
| MM1829C          | 658 | JF854278 | Tortricidae  | Olethreutinae | Olethreutes schulzian    | Fabricius        | Marko Mutaner                                   | 03-Jul-2003 | Finland     |            | Kuusamc                                            | Kuusamc                                            | 66,3122024  | 29,4531002   |
| MM18291          | 658 | JF854279 | Tortricidae  | Olethreutinae | Olethreutes schulziana   | Fabricius        | Marko Mutanen                                   | 21-Jun-2005 | Finland     |            | Kuusamc                                            | Kiminki                                            | 65,07060242 | 25,72480011  |
| MM1964C          | 658 | JN274930 | Tortricidae  | Olethreutinae | Olethreutes schulzian    | Fabricius        | H. Hendrikser                                   | 04-Aug-2003 | Denmark     |            |                                                    |                                                    |             |              |
| NoA-08-325       | 609 | JX008477 | Tortricidae  | Olethreutinae | Olethreutes schulziana   | Fabricius        | D.A. Macaulay, G.R. Pohl, A.D. Roe              | 09-Jul-2001 | Canada      | Alberta    | Sjaellanc                                          | Karuphoj La Butte Ck Wildlands Prov Pk             | 59,36500168 | -111,1299973 |
| NoA-08-326       | 658 | JX008173 | Tortricidae  | Olethreutinae | Olethreutes schulzian    | Fabricius        | Marko Mutanen                                   | 16-Jun-2001 | Canada      | Alberta    |                                                    | Fi McMurray                                        | 56,56000137 | -111,3099976 |
| NoA-08-327       | 658 | JX008195 | Tortricidae  | Olethreutinae | Olethreutes schulzian    | Fabricius        | Marko Mutanen                                   | 02-Jul-2005 | Canada      | Alberta    |                                                    | Fi McMurray                                        | 56,93399811 | -111,5279996 |
| NoA-08-328       | 658 | JX008250 | Tortricidae  | Olethreutinae | Olethreutes schulzian    | Fabricius        | Marko Mutanen                                   | 02-Jul-2005 | Canada      | Alberta    |                                                    | Fi McMurray                                        | 56,93399811 | -111,5279996 |
| NoA-08-329       | 658 | JX008371 | Tortricidae  | Olethreutinae | Olethreutes schulzian    | Fabricius        | D.A. Macaulay, G.R. Pohl, A.D. Roe              | 06-Jul-2001 | Canada      | Alberta    |                                                    | La Butte Ck Wildlands Prov Pk                      | 59,42699814 | -111,4440002 |
| TLMF Lep 0082i   | 658 | HQ968202 | Tortricidae  | Olethreutinae | Olethreutes schulzian    | Fabricius        | Huemer P                                        | 01-Jul-2006 | Austria     | Karnten    |                                                    | Umg. Zollnerseehuetl                               | 46,60599986 | 13,0710001   |
| TLMF Lep 0179i   | 658 | HQ968994 | Tortricidae  | Olethreutinae | Olethreutes schulzian    | Fabricius        | Huemer P                                        | 15-Jul-2006 | Austria     | Steiermark |                                                    | Woersbacher Moos NW                                | 47,55780025 | 14,17059994  |
| TLMF Lep 0447i   | 658 | JN275067 | Tortricidae  | Olethreutinae | Olethreutes schulzian    | Fabricius        | Huemer P                                        | 14-Aug-2010 | Austria     |            | Nordtiro                                           | Walchsee/ Schwerm SE                               | 47,65639877 | 12,30329996  |
| 08BBLEP-02684    | 268 | JX008159 | Papilionidae | Parnassiinae  | Parnassius phoebus       | Fabricius        | J.Straka, J.Cossey                              | 06-Aug-2008 | Canada      | Alberta    | Waterton                                           | Waterton Lakes Nat. Park - LinehamSubalpine meadow | 49,06600189 | -113,9980011 |
| TLMF Lep 0276i   | 658 | JF860278 | Papilionidae | Parnassiinae  | Parnassius phoebus       | Fabricius        | Schmid J.                                       | 10-Jul-2003 | Switzerland | Graubunder |                                                    | Alp Rondadura/ Medel Lu                            | 46,56999966 | 8,77499961   |
| TLMF Lep 0296i   | 658 | JF860400 | Papilionidae | Parnassiinae  | Parnassius phoebus       | Fabricius        | Aistleitner E                                   | 03-Aug-2002 | Switzerland | Graubunder |                                                    | Juf/ Avers                                         | 46,4469986  | 9,57999924   |
| TLMF Lep 0296i   | 658 | JF860401 | Papilionidae | Parnassiinae  | Parnassius phoebus       | Fabricius        | Aistleitner E                                   | 03-Aug-2002 | Switzerland | Graubunder |                                                    | Juf/ Avers                                         | 46,4469986  | 9,57999924   |
| BC ZSM Lep 24205 | 658 | HM376823 | Geometridae  | Larentiinae   | Perizoma minorata        | Treitschke       | A. Haslberger                                   | 17-Jul-2006 | Germany     | Bavaria    | Oberbayern                                         | Berchtesgadener Land                               | 47,68909836 | 12,86270046  |
| MM0009C          | 658 | HM39636f | Geometridae  | Larentiinae   | Perizoma minorata        | Treitschke       | Marko Mutaner                                   |             | Finland     |            | Lapponia inarenensis                               | Enontekiö                                          | 68,99700166 | 20,7439994f  |
| MM04107          | 658 | HM38689f | Geometridae  | Larentiinae   | Perizoma minorata        | Treitschke       | Marko Mutaner                                   |             | Finland     |            | Lapponia inarenensis                               | Enontekiö                                          | 68,99700166 | 20,7439994f  |
| MM06363          | 658 | HQ570329 | Geometridae  | Larentiinae   | Perizoma minorata        | Treitschke       | Marko Mutanen, Anttoni Mutanen, Nestori Mutaner | 29-Jun-2007 | Finland     |            | Lapponia inarenensis                               | Utsjoki                                            | 69,37599945 | 25,80500031  |
| TLMF Lep 00315   | 658 | HM381356 | Geometridae  | Larentiinae   | Perizoma minorata        | Treitschke       | Huemer P.                                       | 16-Jul-2009 | Austria     | Vorarlberg |                                                    | Marul, Lagutzbach, Beim alten Stafel               | 47,20220184 | 9,928059578  |
| TLMF Lep 0274i   | 658 | JF860266 | Geometridae  | Larentiinae   | Perizoma minorata        | Treitschke       | Schmid J.                                       | 24-Jul-2005 | Switzerland | Graubunder |                                                    | Riefawald/ Valt                                    | 46,61800003 | 9,194000244  |
| TLMF Lep 05552   | 658 | JX034681 | Geometridae  | Larentiinae   | Perizoma minorata        | Treitschke       | Huemer P. & Tarmann G. M.                       | 28-Jul-2011 | Macedonia   |            | Mavrovo NP, Korab, Korabska jezera, Kobilino polje | 41,77799988                                        | 20,58200073 |              |
| TLMF Lep 05553   | 658 | JX034696 | Geometridae  | Larentiinae   | Perizoma minorata        | Treitschke       | Huemer P. & Tarmann G. M.                       | 28-Jul-2011 | Macedonia   |            | Mavrovo NP, Korab, Korabska jezera, Kobilino polje | 41,77799988                                        | 20,58200073 |              |
| MM04194          | 658 | HQ570311 | Tortricidae  | Olethreutinae | Phiaris septentrionans   | Curtis           | Marko Mutaner                                   |             | Finland     | Lappi      | Lapponia enontekiensis                             | 68,99700166                                        | 20,7439994f |              |
| MM06395          | 658 | HM873227 | Tortricidae  | Olethreutinae | Phiaris septentrionana   | Curtis           | Marko Mutanen, Anttoni Mutanen, Nestori Mutaner | 30-Jun-2007 | Finland     |            | Lapponia kemensis pars orientalis                  | Utsjoki                                            | 67,15499878 | 27,7840004   |
| MM15687          | 658 | HQ570412 | Tortricidae  | Olethreutinae | Phiaris septentrionans   | Curtis           | Tommi Mutaner                                   | 01-Jul-2003 | Finland     |            | Lapponia enontekiensis                             | Enontekiö                                          | 68,99700166 | 20,7439994f  |
| MM18292          | 658 | JF854280 | Tortricidae  | Olethreutinae | Phiaris septentrionans   | Curtis           | Marko Mutaner                                   | 27-Jun-2002 | Finland     |            | Lapponia inarenensis                               | Utsjoki                                            | 69,28559875 | 25,73390007  |
| MM18293          | 658 | JF854281 | Tortricidae  | Olethreutinae | Phiaris septentrionana   | Curtis           | Marko Mutanen, Nestori Mutanen, Anttoni Mutaner | 10-Jul-2010 | Finland     |            | Lapponia inarenensis                               | Utsjoki                                            | 69,82800293 | 27           |
| MM18294          | 658 | JF854282 | Tortricidae  | Olethreutinae | Phiaris septentrionana   | Curtis           | Marko Mutanen, Nestori Mutanen, Anttoni Mutaner | 10-Jul-2010 | Finland     |            | Lapponia inarenensis                               | Utsjoki                                            | 69,82800293 | 27           |
| MM18295          | 658 | JF854283 | Tortricidae  | Olethreutinae | Phiaris septentrionans   | Curtis           | Marko Mutaner                                   | 03-Jul-2003 | Finland     |            | Kuusamc                                            | Kuusamc                                            | 66,3122024  | 29,4531002   |
| MM18297          | 658 | JF854284 | Tortricidae  | Olethreutinae | Phiaris septentrionana   | Curtis           | Marko Mutanen, Nestori Mutanen, Anttoni Mutaner | 10-Jul-2010 | Finland     |            | Lapponia inarenensis                               | Utsjoki                                            | 69,82800293 | 27           |
| MM18299          | 656 | JF854286 | Tortricidae  | Olethreutinae | Phiaris septentrionana   | Curtis           | Marko Mutanen                                   | 30-Jun-2000 | Finland     |            | Ostrobothnia borealis pars australis               | Pudasjaervi                                        | 65,70240021 | 27,65300906  |
| MM18641          | 622 | JN274981 | Tortricidae  | Olethreutinae | Phiaris septentrionans   | Curtis           | Panu Vaelimaek                                  | 07-Jul-2003 | Finland     |            | Lapponia enontekiensis                             | Enontekiö                                          | 69,04560085 | 20,85540006  |
| 07PROBE-1006i    | 658 | JX008146 | Tortricidae  | Olethreutinae | Phiaris turfosana        | Herrich-Schäffer | P.D.N. Heber                                    | 16-Jul-2007 | Canada      | Manitoba   | Churchill                                          | 13 km E Churchill, Eastern Creel                   | 58,75500101 | -93,94400024 |
| 09PROBE-0947i    | 658 | HM37572f | Tortricidae  | Olethreutinae | Phiaris turfosana        | Herrich-Schäffer | P.D.N. Heber                                    | 28-Jul-2006 | Canada      | Manitoba   | Churchill                                          | 16 km E Churchill, tundra pond                     | 58,75500101 | -93,91500092 |
| 09PROBE-09554    | 658 | HM375805 | Tortricidae  | Olethreutinae | Phiaris turfosana        | Herrich-Schäffer | S.Gillespie                                     | 21-Jul-2009 | Canada      | Manitoba   | Churchill                                          | 9 km S Churchill, Goose Creek Cabin Bog            | 58,69200134 | -94,13200378 |
| MM03228          | 658 | HM871888 | Tortricidae  | Olethreutinae | Phiaris turfosana        | Herrich-Schäffer | Marko Mutanen                                   | 29-Jun-2006 | Finland     |            | Oulun laani                                        | Ostrobothnia borealis pars australis               | 65,07099915 | 25,72500038  |
| MM13995          | 658 | HM875829 | Tortricidae  | Olethreutinae | Phiaris turfosana        | Herrich-Schäffer | Marko Mutanen                                   | 11-Jun-2009 | Finland     |            | Kempele                                            | Ostrobothnia borealis pars australis               | 64,8809967  | 25,58600044  |
| MM18296          | 630 | JX034664 | Tortricidae  | Olethreutinae | Phiaris turfosana        | Herrich-Schäffer | Marko Mutaner                                   | 12-Jul-2003 | Finland     |            | Kuusamc                                            | Kuusamc                                            | 66,3155975  | 29,23030005  |
| MM18298          | 658 | JF854285 | Tortricidae  | Olethreutinae | Phiaris turfosana        | Herrich-Schäffer | Marko Mutanen                                   | 09-Jun-2005 | Finland     |            | Ostrobothnia borealis pars australis               | Utsjoki                                            | 65,07060242 | 25,72480011  |
| MM04162          | 658 | HM38694f | Tortricidae  | Tortricinae   | Phitheochroa vulneratana | Zetterstedt      | Marko Mutaner                                   |             | Finland     |            | Enontekiö                                          | 68,99700166                                        | 20,7439994f |              |
| MM04163          | 658 | HM38695f | Tortricidae  | Tortricinae   | Phitheochroa vulneratana | Zetterstedt      | Marko Mutaner                                   |             | Finland     |            | Enontekiö                                          | 68,99700166                                        | 20,7439994f |              |
| MM06092          | 658 | HM87303f | Tortricidae  | Tortricinae   | Phitheochroa vulneratana | Zetterstedt      | Markus Rantala, Jari Kaitila                    | 01-Jul-2005 | Finland     |            | Regio kuusamoensis                                 | Kuusamc                                            | 66,3209991f | 28,7849998f  |
| MM1031C          | 658 | HM87464f | Tortricidae  | Tortricinae   | Phitheochroa vulneratana | Zetterstedt      | Tommi Mutaner                                   | 02-Jul-2008 | Finland     |            | Regio kuusamoensis                                 | Kuusamc                                            | 66,3119964f | 29,4529991f  |
| TLMF Lep 0274i   | 658 | JF860267 | Tortricidae  | Tortricinae   | Phitheochroa vulneratana | Zetterstedt      | Schmid J.                                       | 10-Jul-2006 | Switzerland | Graubunder | Churchill                                          | Val Zuori/ Tarasp-Fontan                           | 46,7719993f | 10,25800037  |
| 04HBL003075      | 633 | JX008430 | Lycaenidae   | Polyommatae   | Plebejus optilete        | Zetterstedt      | P.D.N. Hebert                                   | 04-Aug-2004 | Canada      | Manitoba   | Churchill                                          | 22 km E Churchill, CNSC                            | 58,72999954 | -93,81999969 |
| MM03344          | 658 | JX008208 | Lycaenidae   | Polyommatae   | Plebejus optilete        | Knoch            | S.VanRyswyk                                     | 13-Jul-2007 | Canada      | Manitoba   | Churchill                                          | 4 km SE Churchill, Dene Villagi                    | 58,73300171 | -94,12000275 |
| MM03345          | 658 | HM871929 | Lycaenidae   | Polyommatae   | Plebejus optilete        | Knoch            | Marko Mutanen, Nestori Mutanen, Anttoni Mutaner | 14-Jul-2006 | Finland     |            | Oulun laani                                        | Ostrobothnia borealis pars australis               | 65,07099915 | 25,72500038  |
| MM03345          | 658 | HM871930 | Lycaenidae   | Polyommatae   | Plebejus optilete        | Knoch            | Marko Mutanen, Nestori Mutanen, Anttoni Mutaner | 14-Jul-2006 | Finland     |            | Oulun laani                                        | Ostrobothnia borealis pars australis               | 65,07099915 | 25,72500038  |
| TLMF Lep 0182i   | 658 | HQ968295 | Lycaenidae   | Polyommatae   | Plebejus optilete        | Knoch            | Marko Mutanen, Nestori Mutanen, Anttoni Mutaner | 11-Jul-2006 | Finland     |            | Oulun laani                                        | Ostrobothnia borealis pars australis               | 65,07099915 | 25,72500038  |
| 09PROBE-09324    | 658 | HM375580 | Gelechiidae  | Gelechiinae   | Prolita sexpunctella     | Fabricius        | P.D.N. Hebert                                   | 26-Jul-2009 | Canada      | Manitoba   | Churchill                                          | 26 km SE Churchill, Twin Lakes burn site           | 46,54999924 | 9,783329964  |
| 09PROBE-09328    | 658 | HM375584 | Gelechiidae  | Gelechiinae   | Prolita sexpunctella     | Fabricius        | P.D.N. Hebert                                   | 26-Jul-2009 | Canada      | Manitoba   | Churchill                                          | 26 km SE Churchill, Twin Lakes burn site           | 46,54999924 | 9,783329964  |
| 09PROBE-09335    | 658 | HM375591 | Gelechiidae  | Gelechiinae   | Prolita sexpunctella     | Fabricius        | P.D.N. Hebert                                   | 26-Jul-2009 | Canada      | Manitoba   | Churchill                                          | 26 km SE Churchill, Twin Lakes burn site           | 46,54999924 | 9,783329964  |

|                  |     |          |               |             |                             |            |                                                               |             |               |                             |                                      |                                             |                               |              |              |
|------------------|-----|----------|---------------|-------------|-----------------------------|------------|---------------------------------------------------------------|-------------|---------------|-----------------------------|--------------------------------------|---------------------------------------------|-------------------------------|--------------|--------------|
| 09PROBE-09339    | 658 | HM375595 | Gelechiidae   | Gelechiinae | <i>Prolita sexpunctella</i> | Fabricius  | P.D.N. Hebert                                                 | 26-Jul-2009 | Canada        | Manitoba                    | Churchill                            | 26 km SE Churchill, Twin Lakes burn site    | 58,61999893                   | -93,83000183 |              |
| 09PROBE-09360    | 658 | HM375616 | Gelechiidae   | Gelechiinae | <i>Prolita sexpunctella</i> | Fabricius  | P.D.N. Hebert                                                 | 26-Jul-2009 | Canada        | Manitoba                    | Churchill                            | 26 km SE Churchill, Twin Lakes burn site    | 58,61999893                   | -93,83000183 |              |
| 09PROBE-09433    | 658 | HM375681 | Gelechiidae   | Gelechiinae | <i>Prolita sexpunctella</i> | Fabricius  | P.D.N. Hebert                                                 | 30-Jul-2006 | Canada        | Manitoba                    | Churchill                            | 11 km S Churchill, Goose Cree               | 58,6599998                    | -94,16999817 |              |
| 09PROBE-09434    | 658 | HM375682 | Gelechiidae   | Gelechiinae | <i>Prolita sexpunctella</i> | Fabricius  | P.D.N. Hebert                                                 | 30-Jul-2006 | Canada        | Manitoba                    | Churchill                            | 11 km S Churchill, Goose Cree               | 58,6599998                    | -94,16999817 |              |
| 09PROBE-09549    | 658 | HM375800 | Gelechiidae   | Gelechiinae | <i>Prolita sexpunctella</i> | Fabricius  | K.Mancuso                                                     | 21-Jul-2009 | Canada        | Manitoba                    | Churchill                            | 9 km S Churchill, Goose Cree Cabin Bog      | 58,69200134                   | -94,13200378 |              |
| CNLEP00026581    | 631 | JX008363 | Gelechiidae   | Gelechiinae | <i>Prolita sexpunctella</i> | Fabricius  | JF Landry & G Poh                                             |             | Canada        | Yukon Territory             | Whitehorse                           | Grey Mtn summi                              | 60,6749992                    | -134,904007  |              |
| CNLEP00026582    | 634 | JX008393 | Gelechiidae   | Gelechiinae | <i>Prolita sexpunctella</i> | Fabricius  | JF Landry & G Poh                                             |             | Canada        | Yukon Territory             | Whitehorse                           | Grey Mtn summi                              | 60,6749992                    | -134,904007  |              |
| CNLEP00026591    | 634 | JX008301 | Gelechiidae   | Gelechiinae | <i>Prolita sexpunctella</i> | Fabricius  | JF Landry & G Poh                                             |             | Canada        | Yukon Territory             | Whitehorse                           | Grey Mtn summi                              | 60,6749992                    | -134,904007  |              |
| CNLEP00026592    | 597 | JX008422 | Gelechiidae   | Gelechiinae | <i>Prolita sexpunctella</i> | Fabricius  | JF Landry & G Poh                                             |             | Canada        | Yukon Territory             | Whitehorse                           | Grey Mtn summi                              | 60,6749992                    | -134,904007  |              |
| CNLEP00026731    | 631 | JX008480 | Gelechiidae   | Gelechiinae | <i>Prolita sexpunctella</i> | Fabricius  | D Holder                                                      | 21-May-2006 | Canada        | British Columbia            | Sheridan Lake                        | Cabin                                       | 60,6749992                    | -134,904007  |              |
| JD0184           | 658 | JX008455 | Gelechiidae   | Gelechiinae | <i>Prolita sexpunctella</i> | Fabricius  | J. J. Dombroskie, C. Schmidt                                  | 18-May-2006 | Canada        | Alberta                     | Jasper N. P., dunes                  |                                             | 53,09700012                   | -118,0029984 |              |
| JD0267           | 658 | JX008303 | Gelechiidae   | Gelechiinae | <i>Prolita sexpunctella</i> | Fabricius  | J. J. Dombroskie, C. Schmidt                                  | 18-May-2006 | Canada        | Alberta                     | Jasper N. P., dunes                  |                                             | 53,09700012                   | -118,0029984 |              |
| KENWR 4389       | 658 | JX008221 | Gelechiidae   | Gelechiinae | <i>Prolita sexpunctella</i> | Fabricius  | D.Collet                                                      |             | United States | Alaska                      | Kenai National Wildlife Refuge       |                                             |                               |              |              |
| MM03220          | 658 | HM871884 | Gelechiidae   | Gelechiinae | <i>Prolita sexpunctella</i> | Fabricius  | Marko Mutanen                                                 | 29-Jun-2006 | Finland       | Oulun laani                 | Ostrobothnia borealis pars australis | Kiminki                                     | 65,07099915                   | 25,72500038  |              |
| MM06425          | 658 | HM873248 | Gelechiidae   | Gelechiinae | <i>Prolita sexpunctella</i> | Fabricius  | Marko Mutanen, Anttoni Mutanen, Nestori Mutaner Marko Mutanen | 08-Jun-2007 | Finland       |                             | Regio kuusamoensis                   | Kuusamo                                     | 66,07499695                   | 29,09900093  |              |
| MM18233          | 658 | JF854228 | Gelechiidae   | Gelechiinae | <i>Prolita sexpunctella</i> | Fabricius  | Marko Mutanen                                                 | 10-Jun-2005 | Finland       |                             | Ostrobothnia borealis pars australis | Kiminki                                     | 65,07060242                   | 25,72480011  |              |
| NoA-08-215       | 658 | JX008475 | Gelechiidae   | Gelechiinae | <i>Prolita sexpunctella</i> | Fabricius  | G. R. Poh                                                     | 14-Jun-2000 | Canada        | Alberta                     |                                      | Fl Chipewyan R.                             | 57,96200118                   | -105,0680006 |              |
| NoA-08-220       | 658 | JX008392 | Gelechiidae   | Gelechiinae | <i>Prolita sexpunctella</i> | Fabricius  | G. R. Poh                                                     | 15-Jun-2000 | Canada        | Alberta                     |                                      | Marquette Crag & Tail Prov P                | 57,71099854                   | -110,3339996 |              |
| NoA-08-221       | 658 | JX008259 | Gelechiidae   | Gelechiinae | <i>Prolita sexpunctella</i> | Fabricius  | Pohl, G. R.                                                   | 15-Jun-2003 | Canada        | Alberta                     |                                      | Caribou Mtns, Margaret I                    | 58,94900131                   | -115,2649994 |              |
| NoA-08-223       | 658 | JX008443 | Gelechiidae   | Gelechiinae | <i>Prolita sexpunctella</i> | Fabricius  | Pohl, G. R.                                                   | 16-Jun-2004 | Canada        | Alberta                     |                                      | SE Hintor                                   | 53,18500131                   | -117,3529968 |              |
| POHL-10-00081    | 658 | HM887744 | Gelechiidae   | Gelechiinae | <i>Prolita sexpunctella</i> | Fabricius  | Pohl, G. R.                                                   | 15-Jul-2006 | Canada        | Yukon Territory             |                                      | Montana Mtn., vic Carcos:                   | 60,07799911                   | -134,7070007 |              |
| TLMF Lep 00601   | 658 | HM381441 | Gelechiidae   | Gelechiinae | <i>Prolita sexpunctella</i> | Fabricius  | Huemmer P.                                                    | 20-Jul-2006 | Italy         |                             | Bellunc                              | Passo di Valparola E                        | 46,52550121                   | 11,99979972  |              |
| TLMF Lep 00757   | 658 | HM426111 | Gelechiidae   | Gelechiinae | <i>Prolita sexpunctella</i> | Fabricius  | Huemmer P.                                                    | 29-Jul-2008 | Austria       | Vorarlberg                  |                                      | Umg. Goepfinger Huette, Gamsboden           | 47,21749878                   | 10,03470039  |              |
| TLMF Lep 00766   | 658 | HM426120 | Gelechiidae   | Gelechiinae | <i>Prolita sexpunctella</i> | Fabricius  | Huemmer P.                                                    | 15-Jul-2009 | Austria       | Steiermark                  |                                      | Tauplitzalm, Umg. Naturfreundehaus          | 47,59579849                   | 13,99499989  |              |
| TLMF Lep 01791   | 658 | HQ968991 | Gelechiidae   | Gelechiinae | <i>Prolita sexpunctella</i> | Fabricius  | Erlebach S.                                                   | 13-Jun-2005 | Austria       | Tyrol                       | Nordtiro                             | Sinnesbrunn, Kapelle E/ Tarren              | 47,2983017                    | 10,79829975  |              |
| TLMF Lep 01792   | 658 | HQ968992 | Gelechiidae   | Gelechiinae | <i>Prolita sexpunctella</i> | Fabricius  | Erlebach S.                                                   | 29-Jul-2004 | Austria       | Tyrol                       | Nordtiro                             | Langer Sattel/ Innsbruck NW                 | 47,31069946                   | 11,35879992  |              |
| TLMF Lep 01793   | 658 | HQ968993 | Gelechiidae   | Gelechiinae | <i>Prolita sexpunctella</i> | Fabricius  | Erlebach S.                                                   | 29-Jul-2004 | Austria       | Tyrol                       | Nordtiro                             | Langer Sattel/ Innsbruck NW                 | 47,31069946                   | 11,35879992  |              |
| TLMF Lep 01794   | 658 | HQ968994 | Gelechiidae   | Gelechiinae | <i>Prolita sexpunctella</i> | Fabricius  | Huemmer P.                                                    | 20-Jul-2006 | Italy         | Bellunc                     |                                      | Passo di Valparola E                        | 46,52550121                   | 11,99979972  |              |
| TLMF Lep 02751   | 606 | JF860270 | Gelechiidae   | Gelechiinae | <i>Prolita sexpunctella</i> | Fabricius  | Schmid J.                                                     | 13-Jul-2006 | Switzerland   | Graubunder                  | Val Poschiavc                        | Curtinatsch/ Piz Alv S-Flank                | 46,43899916                   | 9,99600025   |              |
| TLMF Lep 05347   | 658 | JX034583 | Gelechiidae   | Gelechiinae | <i>Prolita sexpunctella</i> | Fabricius  | Huemmer P. & Tarmann G. M.                                    | 28-Jul-2011 | Macedonia     |                             |                                      | Mavrovo NP, Korab, summit ridge             | 41,78900146                   | 20,54700089  |              |
| TLMF Lep 05348   | 647 | JX034606 | Gelechiidae   | Gelechiinae | <i>Prolita sexpunctella</i> | Fabricius  | Huemmer P. & Tarmann G. M.                                    | 28-Jul-2011 | Macedonia     |                             |                                      | Mavrovo NP, Korab, summit ridge             | 41,78900146                   | 20,54700089  |              |
| MM13334          | 569 | HM875501 | Amphisbatidae |             | <i>Pseudatemelia elsa</i>   | Svensson   | Marko Mutanen, Panu Vaelimael                                 |             | Finland       |                             | Regio Aboensis                       | Dragsfjard                                  | 60,01100155                   | 22,49799916  |              |
| MM15601          | 658 | HM876401 | Amphisbatidae |             | <i>Pseudatemelia elsa</i>   | Svensson   | Marko Mutaner                                                 | 09-Jul-2004 | Finland       |                             | Regio Aboensis                       | Karjalohj                                   | 60,19200134                   | 23,75499916  |              |
| MM15610          | 658 | HM876402 | Amphisbatidae |             | <i>Pseudatemelia elsa</i>   | Svensson   | Marko Mutaner                                                 | 10-Jul-2004 | Finland       |                             | Regio Aboensis                       | Karjalohj                                   | 60,19200134                   | 23,75499916  |              |
| TLMF Lep 02781   | 454 | JX034598 | Amphisbatidae |             | <i>Pseudatemelia elsa</i>   | Svensson   | Deutsch H.                                                    | 26-May-2000 | Italy         |                             | Regio Aboensis                       | Monfalcone                                  | 45,81200021                   | 13,52400017  |              |
| BC ZSM Lep 21996 | 658 | GU686972 | Hesperidae    | Pyrginae    | <i>Pyrgus andromedae</i>    | Wallengren | U. Buchsbaum                                                  | 17-Jul-1999 | Germany       | Bavaria                     | Oberbayern                           | Wettersteingebirge, Kreuzack-Schlubensee    | 47,45280075                   | 11,0685997   |              |
| MM04102          | 630 | HM386892 | Hesperidae    | Pyrginae    | <i>Pyrgus andromedae</i>    | Wallengren | Marko Mutaner                                                 |             | Finland       |                             | Laponia enontekiensi                 | Enontekioc                                  | 68,99700165                   | 20,74399946  |              |
| MM10572          | 631 | HQ570381 | Hesperidae    | Pyrginae    | <i>Pyrgus andromedae</i>    | Wallengren | Tomi Mutaner                                                  | 02-Jul-2003 | Finland       |                             | Laponia enontekiensi                 | Enontekioc                                  | 68,99700165                   | 20,74399946  |              |
| MM17101          | 658 | JN277845 | Hesperidae    | Pyrginae    | <i>Pyrgus andromedae</i>    | Wallengren | Tomi Mutaner                                                  | 25-Jun-2003 | Finland       |                             | Laponia enontekiensi                 | Enontekioc                                  | 69,04560008                   | 20,85540006  |              |
| MM17105          | 658 | JN277846 | Hesperidae    | Pyrginae    | <i>Pyrgus andromedae</i>    | Wallengren | Tomi Mutaner                                                  | 26-Jun-2003 | Finland       |                             | Laponia enontekiensi                 | Enontekioc                                  | 69,04560008                   | 20,85540006  |              |
| TLMF Lep 01108   | 658 | HQ968473 | Hesperidae    | Pyrginae    | <i>Pyrgus andromedae</i>    | Wallengren | Aistleitner U.                                                |             | Switzerland   | Graubunden                  |                                      | Tiefencastel S/ Salout, Got Grond           | 46,85000153                   | 9,597000122  |              |
| TLMF Lep 02741   | 658 | JF860261 | Hesperidae    | Pyrginae    | <i>Pyrgus andromedae</i>    | Wallengren | Schmid J.                                                     | 11-Jun-2005 | Switzerland   | Graubunder                  |                                      | Riefawald/ Val                              | 46,81800003                   | 9,194000244  |              |
| 07PROBE-00371    | 658 | JX008344 | Geometridae   | Larentinae  | <i>Rheumaptera hastata</i>  | Linnaeus   | S.VanRyswyk                                                   | 13-Jul-2007 | Canada        | Manitoba                    | Churchill                            | 23 km E Churchill, Ramsay Cree              | 58,72299951                   | -93,80699921 |              |
| 08BBLEP-00165    | 658 | JX008391 | Geometridae   | Larentinae  | <i>Rheumaptera hastata</i>  | Linnaeus   | J.Cossey, C.Carr, L.Wallace, J.Straka                         | 29-Jun-2008 | Canada        | Ontario                     | Pukaskwa                             | Pukaskwa National Park                      | Halfway Lake forest trail     | 48,59400177  | -86,29000092 |
| 08BBLEP-00167    | 658 | JX008492 | Geometridae   | Larentinae  | <i>Rheumaptera hastata</i>  | Linnaeus   | J.Cossey, C.Carr, L.Wallace, J.Straka                         | 29-Jun-2008 | Canada        | Ontario                     | Pukaskwa                             | Pukaskwa National Park                      | Halfway Lake forest trail     | 48,59400177  | -86,29000092 |
| 08BBLEP-00187    | 658 | JX008351 | Geometridae   | Larentinae  | <i>Rheumaptera hastata</i>  | Linnaeus   | J.Cossey, J.Straka, J.Cossey, S.McCu                          | 29-Jun-2008 | Canada        | Ontario                     | Pukaskwa                             | Pukaskwa National Par                       | camp site evergreen fores     | 48,59000011  | -86,29000092 |
| 08BBLEP-00521    | 658 | JX008291 | Geometridae   | Larentinae  | <i>Rheumaptera hastata</i>  | Linnaeus   | bbin, L.Wallace                                               | 29-Jun-2008 | Canada        | Ontario                     | Pukaskwa                             | Pukaskwa National Park                      | Halfway Lake forest trail     | 48,59000011  | -86,29000092 |
| 08BBLEP-00594    | 658 | JX008296 | Geometridae   | Larentinae  | <i>Rheumaptera hastata</i>  | Linnaeus   | J.Cossey, C.Carr, L.Wallace, J.Straka                         | 02-Jul-2008 | Canada        | Ontario                     | Pukaskwa                             | Pukaskwa National Park                      | Coastal Trail Boreal forest   | 48,56000137  | -86,23000336 |
| 08BBLEP-03441    | 658 | HM423866 | Geometridae   | Larentinae  | <i>Rheumaptera hastata</i>  | Linnaeus   | J.Straka, J.Cossey                                            | 26-Jul-2008 | Canada        | Alberta                     | Waterton                             | Waterton Lakes Nat. Park - Blakiston Creel  | Fast-flowing, rocky creekside | 49,07799911  | -113,8820038 |
| 08BBLEP-03812    | 658 | JX008326 | Geometridae   | Larentinae  | <i>Rheumaptera hastata</i>  | Linnaeus   | J.Straka, J.Cossey                                            | 25-Jul-2008 | Canada        | Alberta                     | Waterton                             | Waterton Lakes Nat. Park - Summit Lake Trai | Subalpine forest/meadow       | 49,00799942  | -114,0250015 |
| 08BBLEP-03813    | 658 | JX008358 | Geometridae   | Larentinae  | <i>Rheumaptera hastata</i>  | Linnaeus   | J.Straka, J.Cossey                                            | 25-Jul-2008 | Canada        | Alberta                     | Waterton                             | Waterton Lakes Nat. Park - Summit Lake Trai | Subalpine forest/meadow       | 49,00799942  | -114,0250015 |
| 08BBLEP-03815    | 658 | JX008219 | Geometridae   | Larentinae  | <i>Rheumaptera hastata</i>  | Linnaeus   | J.Straka, J.Cossey                                            | 25-Jul-2008 | Canada        | Alberta                     | Waterton                             | Waterton Lakes Nat. Park - Summit Lake Trai | Subalpine forest/meadow       | 49,00799942  | -114,0250015 |
| 09BBLE-1281      | 658 | HM415095 | Geometridae   | Larentinae  | <i>Rheumaptera hastata</i>  | Linnaeus   | J. Cossey, R. Labbee, A. Smith, J. Smith, M. Zhan             | 10-Jul-2009 | Canada        | Newfoundland and Terra Nova | Labrador                             | Ochre's Hill                                | Lookout                       | 48,50899887  | -53,95399966 |
| 09BBLE-2209      | 658 | HM415808 | Geometridae   | Larentinae  | <i>Rheumaptera hastata</i>  | Linnaeus   | J. Cossey, R. Labbee, A. Smith, J. Smith, M. Zhan             | 08-Jul-2009 | Canada        | Newfoundland and Terra Nova | Labrador                             | Sandy Pond                                  | Hiking Trail                  | 48,49209976  | -54,02230072 |
| 09BBLE-2210      | 658 | HM415809 | Geometridae   | Larentinae  | <i>Rheumaptera hastata</i>  | Linnaeus   | J. Cossey, R. Labbee, A. Smith, J. Smith, M. Zhan             | 08-Jul-2009 | Canada        | Newfoundland and Terra Nova | Labrador                             | Sandy Pond                                  | Hiking Trail                  | 48,49209976  | -54,02230072 |
| 09BBLE-2436      | 658 | HM416031 | Geometridae   | Larentinae  | <i>Rheumaptera hastata</i>  | Linnaeus   | J. Cossey, R. Labbee, A. Smith, J. Smith, M. Zhan             | 05-Jul-2009 | Canada        | Newfoundland and Terra Nova | Labrador                             | Highway 1                                   | Burn Site                     | 48,53519821  | -53,99140167 |
| 09BBLE-2437      | 658 | HM416032 | Geometridae   | Larentinae  | <i>Rheumaptera hastata</i>  | Linnaeus   | J. Cossey, R. Labbee, A. Smith, J. Smith, M. Zhan             | 05-Jul-2009 | Canada        | Newfoundland and Terra Nova | Labrador                             | Highway 1                                   | Burn Site                     | 48,53519821  | -53,99140167 |
| 09BBLE-2442      | 658 | HM416037 | Geometridae   | Larentinae  | <i>Rheumaptera hastata</i>  | Linnaeus   | J. Cossey, R. Labbee, A. Smith, J. Smith, M. Zhan             | 04-Jul-2009 | Canada        | Newfoundland and Terra Nova | Labrador                             | Malady Head                                 | Green Head Meadow             | 48,64870071  | -53,91699982 |
| 09BBLE-2452      | 658 | HM416047 | Geometridae   | Larentinae  | <i>Rheumaptera hastata</i>  | Linnaeus   | J. Cossey, R. Labbee, A. Smith, J. Smith, M. Zhan             | 04-Jul-2009 | Canada        | Newfoundland and Terra Nova | Labrador                             | Malady Head                                 | Green Head Meadow             | 48,64870071  | -53,91699982 |

|                  |     |          |             |             |                        |          |                                                                  |             |               |                             |                                      |                                              |                               |              |               |
|------------------|-----|----------|-------------|-------------|------------------------|----------|------------------------------------------------------------------|-------------|---------------|-----------------------------|--------------------------------------|----------------------------------------------|-------------------------------|--------------|---------------|
| 09BBELE-2454     | 658 | HM416049 | Geometridae | Larentiinae | Rheumaptera hastata    | Linnaeus | J. Cossey, R. Labbee, A. Smith, J. Smith, M. Zhanq               | 04-Jul-2009 | Canada        | Newfoundland and Terra Nova | Malady Head                          | Green Head Meadow                            | 48,64870071                   | -53,91699982 |               |
| 09PROBE-09636    | 639 | HM430280 | Geometridae | Larentiinae | Rheumaptera hastata    | Linnaeus | P.D.N. Hebert                                                    | 26-Jul-2009 | Canada        | Labrador<br>Manitoba        | Churchill                            | 26 km SE Churchill, Twin Lakes fen           | 58,63199997                   | -93,78600311 |               |
| 10BBCLP-0905     | 658 | JF841919 | Geometridae | Larentiinae | Rheumaptera hastata    | Linnaeus | BiObus 201C                                                      | 15-Jun-2010 | Canada        | Saskatchewan                | Prince Albert NF                     | Open field cmpgrd                            | 53,90499876                   | -106,0739975 |               |
| 10BBCLP-0911     | 658 | JF841925 | Geometridae | Larentiinae | Rheumaptera hastata    | Linnaeus | BiObus 201C                                                      | 11-Jun-2010 | Canada        | Ontario                     | Pukaskwa NF                          | Pukaskwa NP Cmpgrd. Trls                     | Mossy boreal fores            | 48,5929985   | -86,29389954  |
| 10BBCLP-0912     | 658 | JF841926 | Geometridae | Larentiinae | Rheumaptera hastata    | Linnaeus | BiObus 201C                                                      | 12-Jun-2010 | Canada        | Ontario                     | Pukaskwa NF                          | Pukaskwa NP Cmpgrd. Trls                     | Mossy boreal fores            | 48,5929985   | -86,29389954  |
| 10BBCLP-0913     | 658 | JF841927 | Geometridae | Larentiinae | Rheumaptera hastata    | Linnaeus | BiObus 201C                                                      | 10-Jun-2010 | Canada        | Ontario                     | Pukaskwa NF                          | Pukaskwa NP Halfway Lak                      | Dried bank of lake            | 48,59400177  | -86,29579922  |
| 10BBCLP-0914     | 658 | JF841928 | Geometridae | Larentiinae | Rheumaptera hastata    | Linnaeus | BiObus 201C                                                      | 11-Jun-2010 | Canada        | Ontario                     | Pukaskwa NF                          | Pukaskwa NP Cmpgrd. Trls                     | Mossy boreal fores            | 48,5929985   | -86,29389954  |
| 10BBCLP-0915     | 658 | JF841929 | Geometridae | Larentiinae | Rheumaptera hastata    | Linnaeus | BiObus 201C                                                      | 28-Jun-2010 | Canada        | Alberta                     | Jasper NP                            | Pyramid Lake                                 | Douglas fir forest            | 52,91600037  | -118,10399962 |
| 10BBCLP-0921     | 658 | JF841934 | Geometridae | Larentiinae | Rheumaptera hastata    | Linnaeus | BiObus 201C                                                      | 23-Jul-2010 | Canada        | British Columbia            | Yoho NF                              | Takakkaw Fall                                | Forested trail in river basir | 51,5         | -116,4729996  |
| 10BBCLP-0921     | 658 | JF841935 | Geometridae | Larentiinae | Rheumaptera hastata    | Linnaeus | BiObus 201C                                                      | 23-Jul-2010 | Canada        | British Columbia            | Yoho NF                              | Takakkaw Fall                                | Forested trail in river basir | 51,5         | -116,4729996  |
| 10BBCLP-0922     | 658 | JF841936 | Geometridae | Larentiinae | Rheumaptera hastata    | Linnaeus | BiObus 201C                                                      | 21-Jul-2010 | Canada        | British Columbia            | Yoho NF                              | Emerald Lake Trls                            | Lake perimete                 | 51,44300075  | -116,5419998  |
| 10BBCLP-0922     | 658 | JF841937 | Geometridae | Larentiinae | Rheumaptera hastata    | Linnaeus | BiObus 201C                                                      | 23-Jul-2010 | Canada        | British Columbia            | Yoho NF                              | Takakkaw Fall                                | Forested trail in river basir | 51,5         | -116,4729996  |
| 10BBCLP-0922     | 658 | JF841938 | Geometridae | Larentiinae | Rheumaptera hastata    | Linnaeus | BiObus 201C                                                      | 28-Jul-2010 | Canada        | British Columbia            | Kootenay NF                          | Cobb Lake Trl                                | Mixed fores                   | 50,6720008   | -115,8949966  |
| 10BBCLP-0922     | 658 | JF841939 | Geometridae | Larentiinae | Rheumaptera hastata    | Linnaeus | BiObus 201C                                                      | 28-Jul-2010 | Canada        | British Columbia            | Kootenay NF                          | Cobb Lake Trl                                | Mixed fores                   | 50,6720008   | -115,8949966  |
| 10BBCLP-0922     | 658 | JF841940 | Geometridae | Larentiinae | Rheumaptera hastata    | Linnaeus | BiObus 201C                                                      | 28-Jul-2010 | Canada        | British Columbia            | Kootenay NF                          | Cobb Lake Trl                                | Mixed fores                   | 50,6720008   | -115,8949966  |
| 10BBCLP-0922     | 658 | JF841941 | Geometridae | Larentiinae | Rheumaptera hastata    | Linnaeus | BiObus 201C                                                      | 28-Jul-2010 | Canada        | British Columbia            | Kootenay NF                          | Cobb Lake Trl                                | Mixed fores                   | 50,6720008   | -115,8949966  |
| 10BBCLP-0922     | 658 | JF841943 | Geometridae | Larentiinae | Rheumaptera hastata    | Linnaeus | BiObus 201C                                                      | 15-Jul-2010 | Canada        | British Columbia            | Mt. Revelstoke NI                    | Summit Trls                                  | Subalpine meadow              | 51,0390014   | -118,1480022  |
| 10BBCLP-0922     | 658 | JF841944 | Geometridae | Larentiinae | Rheumaptera hastata    | Linnaeus | BiObus 201C                                                      | 17-Jul-2010 | Canada        | British Columbia            | Mt. Revelstoke NI                    | Summit Trls                                  | Subalpine meadow              | 51,0390014   | -118,1480022  |
| 10BBCLP-0931     | 658 | JF841945 | Geometridae | Larentiinae | Rheumaptera hastata    | Linnaeus | BiObus 201C                                                      | 17-Jul-2010 | Canada        | British Columbia            | Mt. Revelstoke NI                    | Summit Trls                                  | Subalpine meadow              | 51,0390014   | -118,1480022  |
| 10BBCLP-0931     | 658 | JF841946 | Geometridae | Larentiinae | Rheumaptera hastata    | Linnaeus | BiObus 201C                                                      | 15-Jul-2010 | Canada        | British Columbia            | Mt. Revelstoke NI                    | Summit Trls                                  | Subalpine meadow              | 51,0390014   | -118,1480022  |
| 10BBCLP-0931     | 658 | JF841947 | Geometridae | Larentiinae | Rheumaptera hastata    | Linnaeus | BiObus 201C                                                      | 16-Jul-2010 | Canada        | British Columbia            | Glacier NF                           | Loop Trl                                     | Riverside fores               | 51,2540016   | -117,538002   |
| 10BBCLP-0931     | 658 | JF841948 | Geometridae | Larentiinae | Rheumaptera hastata    | Linnaeus | BiObus 201C                                                      | 14-Jul-2010 | Canada        | British Columbia            | Glacier NF                           | Loop Trl                                     | Riverside fores               | 51,2540016   | -117,538002   |
| 10BBCLP-0931     | 658 | JF841949 | Geometridae | Larentiinae | Rheumaptera hastata    | Linnaeus | BiObus 201C                                                      | 16-Jul-2010 | Canada        | British Columbia            | Glacier NF                           | Illecillewaet Area Trls                      | Mountain valle                | 51,2649993   | -117,4940033  |
| 10BBCLP-0941     | 658 | JF841955 | Geometridae | Larentiinae | Rheumaptera hastata    | Linnaeus | BiObus 201C                                                      | 14-Jul-2010 | Canada        | British Columbia            | Glacier NF                           | Loop Trl                                     | Riverside fores               | 51,2560005   | -117,538002   |
| 10BBCLP-0942     | 658 | JF841956 | Geometridae | Larentiinae | Rheumaptera hastata    | Linnaeus | BiObus 201C                                                      | 16-Jul-2010 | Canada        | British Columbia            | Glacier NF                           | Illecillewaet Area Trls                      | Mountain valle                | 51,2649993   | -117,4940033  |
| 10BBCLP-0942     | 658 | JF841957 | Geometridae | Larentiinae | Rheumaptera hastata    | Linnaeus | BiObus 201C                                                      | 16-Jul-2010 | Canada        | British Columbia            | Glacier NF                           | Illecillewaet Area Trls                      | Mountain valle                | 51,2649993   | -117,4940033  |
| 10BBCLP-0942     | 658 | JF841958 | Geometridae | Larentiinae | Rheumaptera hastata    | Linnaeus | BiObus 201C                                                      | 14-Jul-2010 | Canada        | British Columbia            | Glacier NF                           | Bostock Trl                                  | Montane fores                 | 51,2299995   | -117,6689992  |
| 10BBCLP-0942     | 658 | JF841959 | Geometridae | Larentiinae | Rheumaptera hastata    | Linnaeus | BiObus 201C                                                      | 16-Jul-2010 | Canada        | British Columbia            | Glacier NF                           | Illecillewaet Area Trls                      | Mountain valle                | 51,2649993   | -117,4940033  |
| BC ZSM Lep 35511 | 232 | JX034628 | Geometridae | Larentiinae | Rheumaptera hastata    | Linnaeus | P. Skou                                                          | 02-Jul-2006 | Norway        | Vestfold                    |                                      |                                              | Priestseta                    | 60,6834983   | 10,6421003    |
| KENWR LEP-05     | 630 | JX008389 | Geometridae | Larentiinae | Rheumaptera hastata    | Linnaeus | D.Collet                                                         | 19-Jun-2004 | United States | Alaska                      | Kenai National Wildlife Refuge       | Finger Lake Road                             | open mixed forest             | 60,65000153  | -150,8329926  |
| KENWR LEP-06     | 630 | JX008487 | Geometridae | Larentiinae | Rheumaptera hastata    | Linnaeus | D.Collet                                                         | 19-Jun-2004 | United States | Alaska                      | Kenai National Wildlife Refuge       | Finger Lake Road                             | open mixed forest             | 60,65000153  | -150,8329926  |
| MM00580          | 658 | HM871078 | Geometridae | Larentiinae | Rheumaptera hastata    | Linnaeus | Marko Mutanen                                                    | 07-Jun-2006 | Finland       |                             | Ostrobothnia borealis pars australis |                                              | Kiminki                       | 65,07099915  | 25,72500038   |
| MM06321          | 609 | HM873199 | Geometridae | Larentiinae | Rheumaptera hastata    | Linnaeus | Marko Mutanen, Anttoni Mutanen, Nestori Mutanen                  | 27-Jun-2006 | Finland       |                             | Ostrobothnia borealis pars australis |                                              | Tornio                        | 65,86100006  | 24,37100029   |
| MM10108          | 658 | HM874579 | Geometridae | Larentiinae | Rheumaptera hastata    | Linnaeus | Marko Mutanen, Nestori Mutanen, Anttoni Mutanen                  | 21-Jun-2008 | Finland       |                             | Ostrobothnia borealis pars australis |                                              | Kiminki                       | 65,07099915  | 25,72500038   |
| MM18450          | 658 | JF854331 | Geometridae | Larentiinae | Rheumaptera hastata    | Linnaeus | Marko Mutanen, Nestori Mutanen, Anttoni Mutanen                  | 06-Jun-2010 | Finland       |                             | Ostrobothnia borealis pars australis |                                              | Kiminki                       | 65,07060242  | 25,72480011   |
| MM18451          | 658 | JF854332 | Geometridae | Larentiinae | Rheumaptera hastata    | Linnaeus | Anttoni Mutanen, Marko Mutanen, Nestori Mutanen, Anttoni Mutanen | 11-Jun-2010 | Finland       |                             | Ostrobothnia borealis pars australis |                                              | Kiminki                       | 65,07060242  | 25,72480011   |
| MM18452          | 658 | JF854333 | Geometridae | Larentiinae | Rheumaptera hastata    | Linnaeus | Marko Mutanen                                                    | 21-Jun-1999 | Finland       |                             | Ostrobothnia borealis pars australis |                                              | Utajarvi                      | 65,042099    | 23,81450081   |
| MNBT-201         | 658 | JX008361 | Geometridae | Larentiinae | Rheumaptera hastata    | Linnaeus | A. W. Thomas                                                     | 29-Jun-2005 | Canada        | New Brunswick               | York County                          | Fredricton north, 4E                         | 45,8499984                    | -67,6999969  |               |
| MNBT-284         | 658 | JX008230 | Geometridae | Larentiinae | Rheumaptera hastata    | Linnaeus | A. W. Thomas                                                     | 12-Jun-2006 | Canada        | New Brunswick               | Sunbury Co.                          | Acadia Research Fores                        | 46                            | -66,30000305 |               |
| TLMF Lep 0281:   | 658 | JF860306 | Geometridae | Larentiinae | Rheumaptera hastata    | Linnaeus | Erlebach S.                                                      | 24-Mar-2010 | Austria       | Tyrol                       | Nordtiro                             | Riedastel/ Aechal                            | 47,26800156                   | 11,86699962  |               |
| TLMF Lep 0281:   | 658 | JF860307 | Geometridae | Larentiinae | Rheumaptera hastata    | Linnaeus | Erlebach S. & Tarmann G. M                                       | 16-Jul-2006 | Austria       | Tyrol                       | Nordtiro                             | Roetboden/ Lanersbad                         | 47,1279983                    | 11,72599982  |               |
| TLMF Lep 0281:   | 428 | JX034635 | Geometridae | Larentiinae | Rheumaptera hastata    | Linnaeus | Erlebach S. & Tarmann G. M                                       | 16-Jul-2006 | Austria       | Tyrol                       | Nordtiro                             | Roetboden/ Lanersbad                         | 47,1279983                    | 11,72599982  |               |
| TLMF Lep 0281:   | 658 | JF860308 | Geometridae | Larentiinae | Rheumaptera hastata    | Linnaeus | Erlebach S.                                                      | 25-Mar-2007 | Austria       | Tyrol                       | Umj. Innsbruck                       | Samertal, Brandstatt                         | 47,3380012                    | 11,3760004   |               |
| TLMF Lep 02818   | 658 | JF860309 | Geometridae | Larentiinae | Rheumaptera hastata    | Linnaeus | Huemmer P. & Erlebach S.                                         | 11-Jul-2008 | Austria       | Salzburg                    |                                      | Wildgerlostal, S Trisslalm/ Krimml           | 47,18999863                   | 12,11299992  |               |
| TLMF Lep 02824   | 658 | JF860310 | Geometridae | Larentiinae | Rheumaptera hastata    | Linnaeus | Mayr T.                                                          | 01-Jul-2006 | Switzerland   | Graubunden                  |                                      | Weg zwischen Gadastatt und Sulzalp, Splueger | 46,55799866                   | 9,31099987   |               |
| TLMF Lep 0282:   | 658 | JF860311 | Geometridae | Larentiinae | Rheumaptera hastata    | Linnaeus | Mayr T.                                                          | 19-Jun-2005 | Switzerland   | Graubunder                  |                                      | Surselva, Sedrun, Stausee Nalp               | 46,6419982                    | 8,76000022   |               |
| TLMF Lep 02829   | 658 | JF860312 | Geometridae | Larentiinae | Rheumaptera hastata    | Linnaeus | Huemmer P. & Erlebach S.                                         | 11-Jul-2008 | Austria       | Salzburg                    |                                      | Wildgerlostal, S Trisslalm/ Krimml           | 47,18999863                   | 12,11299992  |               |
| 07PROBE-0036:    | 655 | JX008307 | Geometridae | Larentiinae | Rheumaptera subhastata | Nolcker  | E.Robinson                                                       | 13-Jul-2007 | Canada        | Manitoba                    | Churchill                            | 23 km E Churchill, Ramsay Cree               | 58,7229995                    | -93,80699921 |               |
| 07PROBE-0060:    | 656 | JX008407 | Geometridae | Larentiinae | Rheumaptera subhastata | Nolcker  | P.D.N. Heber                                                     | 15-Jul-2007 | Canada        | Manitoba                    | Churchill                            | 26 km SE Churchill, Twin Lake                | 58,63199997                   | -93,81900024 |               |
| 07PROBE-0382:    | 658 | JX008300 | Geometridae | Larentiinae | Rheumaptera subhastata | Nolcker  | A.Renaux                                                         | 30-Jun-2007 | Canada        | Manitoba                    | Churchill                            | 23 km E Churchill, Ramsay Cree               | 58,7309998                    | -93,7799987  |               |
| 08BBLEP-01665    | 644 | JX008379 | Geometridae | Larentiinae | Rheumaptera subhastata | Nolcker  | J.Cossey, N.Jeffery, J.Straka                                    | 14-Jul-2008 | Canada        | Saskatchewan                | Grasslands                           | Grasslands N.P. Visitor's cente              | 49,2459983                    | -107,732002  |               |
| 08BBLEP-03816    | 615 | JX008207 | Geometridae | Larentiinae | Rheumaptera subhastata | Nolcken  | J.Straka,J.Cossey                                                | 25-Jul-2008 | Canada        | Alberta                     | Waterton                             | Waterton Lakes Nat. Park - Summit            | Subalpine forest/meadow       | 49,00799942  | -114,0250015  |
| 09BBELE-2458     | 658 | HM416053 | Geometridae | Larentiinae | Rheumaptera subhastata | Nolcken  | J. Cossey, R. Labbee, A. Smith, J. Smith, M. Zhanq               | 05-Jul-2009 | Canada        | Newfoundland and Terra Nova | Labrador                             | Highway 1                                    | Burn Site                     | 48,53519821  | -53,99140167  |
| 09PROBE-09522    | 658 | HM405868 | Geometridae | Larentiinae | Rheumaptera subhastata | Nolcken  | P.D.N. Hebert                                                    | 19-Jul-2009 | Canada        | Manitoba                    | Churchill                            | 26 km SE Churchill, Twin Lakes fen           | 58,63199997                   | -93,78600311 |               |
| 09PROBE-09525    | 658 | HM375776 | Geometridae | Larentiinae | Rheumaptera subhastata | Nolcken  | P.D.N. Hebert                                                    | 19-Jul-2009 | Canada        | Manitoba                    | Churchill                            | 26 km SE Churchill, Twin Lakes fen           | 58,63199997                   | -93,78600311 |               |
| 09PROBE-09562    | 658 | HM375813 | Geometridae | Larentiinae | Rheumaptera subhastata | Nolcken  | P.D.N. Hebert                                                    | 24-Jul-2009 | Canada        | Manitoba                    | Churchill                            | 26 km SE Churchill, Twin Lakes burn site     | 58,61999893                   | -93,83000183 |               |
| 09PROBE-09568    | 658 | HM375819 | Geometridae | Larentiinae | Rheumaptera subhastata | Nolcken  | P.D.N. Hebert                                                    | 24-Jul-2009 | Canada        | Manitoba                    | Churchill                            | 26 km SE Churchill, Twin Lakes burn site     | 58,61999893                   | -93,83000183 |               |
| 09PROBE-09571    | 658 | HM405869 | Geometridae | Larentiinae | Rheumaptera subhastata | Nolcken  | P.D.N. Hebert                                                    | 24-Jul-2009 | Canada        | Manitoba                    | Churchill                            | 26 km SE Churchill, Twin Lakes burn site     | 58,61999893                   | -93,83000183 |               |
| 09PROBE-09637    | 658 | HM430281 | Geometridae | Larentiinae | Rheumaptera subhastata | Nolcken  | P.D.N. Hebert                                                    | 26-Jul-2009 | Canada        | Manitoba                    | Churchill                            | 26 km SE Churchill, Twin Lakes fen           | 58,63199997                   | -93,78600311 |               |
| 09PROBE-09638    | 614 | HM430282 | Geometridae | Larentiinae | Rheumaptera subhastata | Nolcken  | P.D.N. Hebert                                                    | 26-Jul-2009 | Canada        | Manitoba                    | Churchill                            | 26 km SE Churchill, Twin Lakes fen           | 58,63199997                   | -93,78600311 |               |
| 10BBCLP-0906     | 658 | JF841920 | Geometridae | Larentiinae | Rheumaptera subhastata | Nolcker  | BiObus 201C                                                      | 18-Jun-2010 | Canada        | Saskatchewan                | Prince Albert NF                     | Overflow Cmpgrd                              | Open field cmpgrd             | 53,90499876  | -106,0739975  |
| BC NP 0376       | 658 | JX034645 | Geometridae | Larentiinae | Rheumaptera subhastata | Nolcker  | N. Poel                                                          | 27-Jun-2004 | Austria       | Oberosterreich              | Salzburg                             | Loekenuomoosberg                             | 47,56000131                   | 13,55000016  |               |
| BC ZSM Lep 3934: | 658 | JF851430 | Geometridae | Larentiinae | Rheumaptera subhastata | Nolcker  | A. Haslberger                                                    | 17-Jul-1996 | Austria       | Salzburg                    |                                      | Lackenmoss                                   | 47,2482986                    | 13,5577001   |               |
| BC ZSM Lep 4921: | 658 | JN274121 | Geometridae | Larentiinae | Rheumaptera subhastata | Nolcker  | L. Weigert                                                       | 07-Jul-2011 | Sweden        |                             | Torne Lappmar                        | 8 km NE Jukkasjaern                          | 67,88890075                   | 20,7563991   |               |
| CHU06-COL-28:    | 658 | JX008352 | Geometridae | Larentiinae | Rheumaptera subhastata | Nolcker  | Arctic & Boreal Entomology                                       | 14-Aug-2006 | Canada        | Manitoba                    | Churchill                            | 23 km E Churchill, Ramsay Cree               | Small Cree                    | 58,7309998   | -93,7799987   |
| CHU06-COL-28:    | 658 | JX008330 | Geometridae | Larentiinae | Rheumaptera subhastata | Nolcker  | Arctic & Boreal Entomology                                       | 14-Aug-2006 | Canada        | Manitoba                    |                                      |                                              |                               |              |               |



|                |     |          |               |               |                          |               |                                                |             |             |                                      |                                                   |             |             |
|----------------|-----|----------|---------------|---------------|--------------------------|---------------|------------------------------------------------|-------------|-------------|--------------------------------------|---------------------------------------------------|-------------|-------------|
| MM06292        | 658 | HM873178 | Geometridae   | Larentiinae   | Rheumaptera subhastata   | Nolcken       | Marko Mutanen, Nestori Mutanen, Anttoni Mutane | 27-Jun-2007 | Finland     | Lapponia kemensis pars orientalis    | Sodankylae                                        | 68,22299957 | 27,21699905 |
| MM06308        | 658 | HM873191 | Geometridae   | Larentiinae   | Rheumaptera subhastata   | Nolcken       | Marko Mutanen, Anttoni Mutanen, Nestori Mutane | 28-Jun-2006 | Finland     | Lapponia inarenis                    | Inari                                             | 68,4469986  | 27,41399956 |
| MM10312        | 658 | HM874646 | Geometridae   | Larentiinae   | Rheumaptera subhastata   | Nolcker       | Marko Mutanen, Nestori Mutanen, Anttoni Mutane | 02-Jul-2006 | Finland     | Regio kuusamoensis                   | Kuusam                                            | 66,3119964  | 29,45299911 |
| MM17986        | 658 | JF854040 | Geometridae   | Larentiinae   | Rheumaptera subhastata   | Nolcken       | Marko Mutanen, Nestori Mutanen, Anttoni Mutane | 10-Jul-2010 | Finland     | Lapponia inarenis                    | Utsjoki                                           | 69,82800293 | 27          |
| MM17987        | 658 | JF854041 | Geometridae   | Larentiinae   | Rheumaptera subhastata   | Nolcken       | Marko Mutanen, Nestori Mutanen, Anttoni Mutane | 10-Jul-2010 | Finland     | Lapponia inarenis                    | Utsjoki                                           | 69,82800293 | 27          |
| MM18454        | 658 | JF854334 | Geometridae   | Larentiinae   | Rheumaptera subhastata   | Nolcken       | Marko Mutanen                                  | 15-Jun-1999 | Finland     | Ostrobothnia borealis pars australis | Utajärvi                                          | 65,042099   | 23,81450081 |
| MM18455        | 658 | JF854335 | Geometridae   | Larentiinae   | Rheumaptera subhastata   | Nolcken       | Tommi Mutanen                                  | 03-Jun-1999 | Finland     | Ostrobothnia borealis pars australis | li                                                | 65,33529663 | 25,2826004  |
| MM18456        | 658 | JN279414 | Geometridae   | Larentiinae   | Rheumaptera subhastata   | Nolcker       | Tommi Mutanen                                  | 24-Jun-2003 | Finland     | Lapponia onontekiensis               | Enontekiö                                         | 69,04560098 | 20,85540006 |
| MM18457        | 598 | JF854336 | Geometridae   | Larentiinae   | Rheumaptera subhastata   | Nolcker       | Marko Mutanen, Tommi Mutanen                   | 01-Aug-2000 | Finland     | Lapponia inarenis                    | Inari                                             | 68,39360046 | 27,24320003 |
| MM18459        | 581 | JX034571 | Geometridae   | Larentiinae   | Rheumaptera subhastata   | Nolcken       | Marko Mutanen                                  | 09-Jun-1999 | Finland     | Ostrobothnia borealis pars australis | Utajärvi                                          | 65,042099   | 23,81450081 |
| MM18460        | 658 | JF854337 | Geometridae   | Larentiinae   | Rheumaptera subhastata   | Nolcken       | Marko Mutanen                                  | 09-Jun-1999 | Finland     | Ostrobothnia borealis pars australis | Utajärvi                                          | 65,042099   | 23,81450081 |
| MM18462        | 618 | JF854338 | Geometridae   | Larentiinae   | Rheumaptera subhastata   | Nolcken       | Marko Mutanen                                  | 15-Jun-1999 | Finland     | Ostrobothnia borealis pars australis | Utajärvi                                          | 65,042099   | 23,81450081 |
| MM18463        | 658 | JF854339 | Geometridae   | Larentiinae   | Rheumaptera subhastata   | Nolcken       | Tommi Mutanen                                  | 11-Jun-1999 | Finland     | Ostrobothnia borealis pars australis | Simo                                              | 65,69619751 | 25,47640038 |
| MM18464        | 658 | JF854340 | Geometridae   | Larentiinae   | Rheumaptera subhastata   | Nolcken       | Tommi Mutanen                                  | 11-Jun-1999 | Finland     | Ostrobothnia borealis pars australis | Simo                                              | 65,69619751 | 25,47640038 |
| TLMF Lep 0283  | 658 | JF860313 | Geometridae   | Larentiinae   | Rheumaptera subhastata   | Nolcker       | Erlebach S.                                    | 28-Mar-2006 | Austria     | Nordtirol, Zentralalpe               | Zillertal, Baerenbadl                             | 47,1220016  | 12,04300022 |
| MM15633        | 658 | HM876421 | Gelechiidae   | Gelechiinae   | Scrobipalpa murinella    | Duponchel     | Tommi Mutanen                                  | 05-Jun-2004 | Finland     | Karelia borealis                     | Liperi                                            | 62,63100052 | 29,5340004  |
| MM15634        | 658 | HM876422 | Gelechiidae   | Gelechiinae   | Scrobipalpa murinella    | Duponchel     | Tommi Mutanen                                  | 05-Jun-2004 | Finland     | Karelia borealis                     | Liperi                                            | 62,63100052 | 29,5340004  |
| MM17937        | 658 | JF853997 | Gelechiidae   | Gelechiinae   | Scrobipalpa murinella    | Duponchel     | Sami Haapala                                   | 31-May-2009 | Finland     | Savonia australis                    | Imatra                                            | 61,2412986  | 28,88100052 |
| TLMF Lep 02847 | 658 | JX034595 | Gelechiidae   | Gelechiinae   | Scrobipalpa murinella    | Duponchel     | Huemer P.                                      | 04-Aug-2010 | France      | Provence-Alpes-Cote d'Azur           | Col Agnel                                         | 44,88899918 | 6,984000206 |
| TLMF Lep 02848 | 658 | JX034624 | Gelechiidae   | Gelechiinae   | Scrobipalpa murinella    | Duponchel     | Huemer P.                                      | 04-Aug-2010 | France      | Provence-Alpes-Cote d'Azur           | Col Agnel                                         | 44,88899918 | 6,984000206 |
| TLMF Lep 02849 | 658 | JX034587 | Gelechiidae   | Gelechiinae   | Scrobipalpa murinella    | Duponchel     | Huemer P.                                      | 04-Aug-2010 | France      | Provence-Alpes-Cote d'Azur           | Col Agnel                                         | 44,88899918 | 6,984000206 |
| MM10495        | 658 | HM874786 | Gelechiidae   | Gelechiinae   | Scrobipalpopis petasitis | Pfaffenzeller | Marko Mutanen, Tommi Mutanen                   |             | Finland     | Lapponia kemensis pars orientalis    | Pelkosenniemi                                     | 67,13700104 | 27,69199944 |
| MM11172        | 658 | HM875036 | Gelechiidae   | Gelechiinae   | Scrobipalpopis petasitis | Pfaffenzeller | Marko Mutanen, Panu Vaelmaeki                  |             | Finland     | Lapponia kemensis pars orientalis    | Pelkosenniemi                                     | 67,15399933 | 27,85400009 |
| MM18235        | 658 | JF854230 | Gelechiidae   | Gelechiinae   | Scrobipalpopis petasitis | Pfaffenzeller | Marko Mutanen, Tommi Mutanen                   | 01-Aug-2000 | Finland     | Lapponia kemensis pars orientalis    | Pelkosenniemi                                     | 67,13710022 | 27,6916008  |
| TLMF Lep 00865 | 658 | HQ968239 | Gelechiidae   | Gelechiinae   | Scrobipalpopis petasitis | Pfaffenzeller | Huemer P.                                      | 20-Jun-2008 | Austria     | Vorarlberg                           | Sonntag, Buchboden, NW Bad Rotenbrunner           | 47,24499893 | 9,970999718 |
| TLMF Lep 00866 | 658 | HQ968240 | Gelechiidae   | Gelechiinae   | Scrobipalpopis petasitis | Pfaffenzeller | Huemer P.                                      | 20-Jun-2008 | Austria     | Vorarlberg                           | Sonntag, Buchboden, NW Bad Rotenbrunner           | 47,24499893 | 9,970999718 |
| TLMF Lep 0193  | 658 | HQ968342 | Gelechiidae   | Gelechiinae   | Scrobipalpopis petasitis | Pfaffenzeller | Huemer P.                                      | 08-Jun-2010 | Austria     | Tyrol                                | Halla                                             | 47,3273010  | 11,52470016 |
| TLMF Lep 0193  | 658 | HQ968343 | Gelechiidae   | Gelechiinae   | Scrobipalpopis petasitis | Pfaffenzeller | Huemer P.                                      | 08-Jun-2010 | Austria     | Tyrol                                | Halla                                             | 47,3273010  | 11,52470016 |
| TLMF Lep 0275  | 658 | JF860271 | Gelechiidae   | Gelechiinae   | Scrobipalpopis petasitis | Pfaffenzeller | Schmid J.                                      | 26-May-2006 | Switzerland | Graubunder                           | Versamer Tobel/ Bonadu                            | 46,79800034 | 9,345999716 |
| TLMF Lep 02949 | 658 | JF860385 | Gelechiidae   | Gelechiinae   | Scrobipalpopis petasitis | Pfaffenzeller | Huemer P.                                      | 15-Jun-2010 | Austria     | Vorarlberg                           | Sonntag, Buchboden, E Hintergurg                  | 47,24900055 | 9,991000175 |
| TLMF Lep 02950 | 658 | JF860386 | Gelechiidae   | Gelechiinae   | Scrobipalpopis petasitis | Pfaffenzeller | Huemer P.                                      | 15-Jun-2010 | Austria     | Vorarlberg                           | Sonntag, Buchboden, E Hintergurg                  | 47,24900055 | 9,991000175 |
| MM15925        | 658 | JF853548 | Arctiidae     | Arctiinae     | Setema cereola           | Hübner        | Arto Tervonper                                 | 21-Jul-1995 | Finland     | Savonia australis                    | Mikkel                                            | 61,75699997 | 27          |
| MM17452        | 658 | JF853847 | Arctiidae     | Arctiinae     | Setema cereola           | Hübner        | Kari Vaalamc                                   | 23-Jul-1993 | Finland     | Savonia australis                    | Mikkelin mik                                      | 61,75699997 | 27          |
| TLMF Lep 00294 | 658 | HM381355 | Arctiidae     | Arctiinae     | Setema cereola           | Hübner        | Huemer P.                                      | 16-Jul-2009 | Austria     | Vorarlberg                           | Marul, Lagutzbach, Beim alten Stafe               | 47,20220184 | 9,928059578 |
| TLMF Lep 0275  | 658 | JF860273 | Arctiidae     | Arctiinae     | Setema cereola           | Hübner        | Schmid J.                                      | 23-Jun-2007 | Switzerland | Graubunder                           | Stagl, Plazil/ Berguer                            | 46,85100098 | 9,729999542 |
| TLMF Lep 02896 | 658 | JF860347 | Arctiidae     | Arctiinae     | Setema cereola           | Hübner        | Huemer P.                                      | 16-Jul-2009 | Austria     | Vorarlberg                           | Marul, Lagutzbach, Beim alten Stafe               | 47,20199966 | 9,92800045  |
| TLMF Lep 02897 | 658 | JF860348 | Arctiidae     | Arctiinae     | Setema cereola           | Hübner        | Huemer P.                                      | 16-Jul-2009 | Austria     | Vorarlberg                           | Marul, Lagutzbach, Beim alten Stafe               | 47,20199966 | 9,92800045  |
| MM04142        | 658 | HM386933 | Tortricidae   | Tortricinae   | Sparganothis praecani    | Kennel        | Marko Mutanen                                  |             | Finland     | Lapponia onontekiensis               | Enontekiö                                         | 68,9970016  | 20,74399946 |
| MM04146        | 658 | HM386933 | Tortricidae   | Tortricinae   | Sparganothis praecani    | Kennel        | Marko Mutanen                                  |             | Finland     | Lapponia onontekiensis               | Enontekiö                                         | 68,9970016  | 20,74399946 |
| MM1458C        | 658 | HM876174 | Tortricidae   | Tortricinae   | Sparganothis praecani    | Kennel        | Marko Mutanen                                  |             | Finland     | Lapponia onontekiensis               | Enontekiö                                         | 69,06300354 | 21,10199922 |
| TLMF Lep 02891 | 369 | JX034612 | Tortricidae   | Tortricinae   | Sparganothis praecani    | Kennel        | Jaros J. & Spitzer K.                          | 04-Jul-1997 | Austria     | Steiermark                           | Klosterneuburger Huett                            | 47,26499933 | 14,37800026 |
| MM12505        | 658 | HM875304 | Noctuidae     | Noctuidae     | Standfussiana lucerneae  | Linnaeus      | Marko Mutanen, Panu Vaelmael                   |             | Finland     | Regio Aboensis                       | Dragsfjærd                                        | 60,0110015  | 22,49799916 |
| MM17221        | 658 | JF853696 | Noctuidae     | Noctuidae     | Standfussiana lucerneae  | Linnaeus      | Lauri Kaila                                    | 30-Jun-2006 | Finland     | Nylandia                             | Tammisaar                                         | 59,82899857 | 23,61199951 |
| MM17495        | 658 | JX034667 | Noctuidae     | Noctuidae     | Standfussiana lucerneae  | Linnaeus      | Henrik Bruur                                   |             | Finland     | Regio Aboensis                       | Houtskae                                          | 60,19699986 | 21,26199913 |
| MM1750C        | 658 | JX034653 | Noctuidae     | Noctuidae     | Standfussiana lucerneae  | Linnaeus      | Henrik Bruur                                   |             | Finland     | Regio Aboensis                       | Houtskae                                          | 60,19699986 | 21,26199913 |
| TLMF Lep 00351 | 658 | HM425843 | Noctuidae     | Noctuidae     | Standfussiana lucerneae  | Linnaeus      | Huemer P.                                      | 26-Jul-2009 | France      | Provence-Alpes-Cote d'Azur           | N Col de la Boucharde/ Col de la Cayolle N        | 44,28329849 | 6,743330002 |
| TLMF Lep 00376 | 658 | HM425864 | Noctuidae     | Noctuidae     | Standfussiana lucerneae  | Linnaeus      | Huemer P.                                      | 31-Jul-2009 | Austria     | Karnten                              | Mallnitz, Doesental, Arthur-v.-Schmid-Haus W      | 46,89939896 | 13,26690006 |
| TLMF Lep 00415 | 658 | HM425898 | Noctuidae     | Noctuidae     | Standfussiana lucerneae  | Linnaeus      | Huemer P.                                      | 23-Jul-2009 | Italy       | Cuneo                                | Colle Valcavera NE/ Demonte NW                    | 44,38439941 | 7,106389999 |
| TLMF Lep 01960 | 658 | HQ968372 | Noctuidae     | Noctuidae     | Standfussiana lucerneae  | Linnaeus      | Huemer P.                                      | 14-Jul-2010 | Italy       | Abruzzi                              | L'Aquila                                          | 42,42670059 | 13,71329975 |
| TLMF Lep 05543 | 658 | JX034615 | Noctuidae     | Noctuidae     | Standfussiana lucerneae  | Linnaeus      | Huemer P. & Tarmann G. M.                      | 28-Jul-2011 | Macedonia   |                                      | Mavrovo NP, Korab, Korabska jezera, Kobilino polk | 41,77799988 | 20,58200073 |
| TLMF Lep 05544 | 658 | JX034610 | Noctuidae     | Noctuidae     | Standfussiana lucerneae  | Linnaeus      | Huemer P. & Tarmann G. M.                      | 28-Jul-2011 | Macedonia   |                                      | Mavrovo NP, Korab, Korabska jezera, Kobilino polk | 41,77799988 | 20,58200073 |
| TLMF Lep 0129  | 307 | JX034586 | Pterophoridae | Pterophorinae | Stenoptilia alpinalis    | Burmman       | Ryholm N                                       | 04-Aug-1993 | Austria     | Ostiro                               | Sajathuette/ Praegraten NV                        | 47,03900146 | 12,35400006 |
| TLMF Lep 0129  | 614 | HQ968552 | Pterophoridae | Pterophorinae | Stenoptilia alpinalis    | Burmman       | Ryholm N                                       | 04-Aug-1993 | Austria     | Ostiro                               | Sajathuette/ Praegraten NV                        | 47,03900146 | 12,35400006 |
| TLMF Lep 01296 | 658 | HQ968553 | Pterophoridae | Pterophorinae | Stenoptilia brigantensis | Nel & Gibeaux | Nel J.                                         | 06-Jul-2003 | France      | Provence-Alpes-Cote d'Azur           | Col de Vars                                       | 44,54199982 | 6,650999985 |
| TLMF Lep 0129  | 658 | HQ968554 | Pterophoridae | Pterophorinae | Stenoptilia brigantensis | Nel & Gibeaux | Nel J.                                         | 19-Jul-2007 | France      | Rhone-Alpes                          | Tignes                                            | 45,46099854 | 6,88999986  |
| TLMF Lep 0129  | 658 | HQ968555 | Pterophoridae | Pterophorinae | Stenoptilia brigantensis | Nel & Gibeaux | Nel J.                                         | 19-Jul-2007 | France      | Rhone-Alpes                          | Tignes                                            | 45,46099854 | 6,88999986  |
| TLMF Lep 01267 | 648 | HQ968544 | Pterophoridae | Pterophorinae | Stenoptilia buvati       | Nel & Gibeaux | Nel J.                                         | 05-Jul-2004 | France      | Provence-Alpes-Cote d'Azur           | Bois des Freaux                                   | 45,04299927 | 6,281000137 |

|                  |     |          |               |                |                           |                              |                                                             |               |                            |                                  |                                                       |             |              |
|------------------|-----|----------|---------------|----------------|---------------------------|------------------------------|-------------------------------------------------------------|---------------|----------------------------|----------------------------------|-------------------------------------------------------|-------------|--------------|
| MM00096          | 658 | HM39637  | Pterophoridae | Pterophorinae  | Stenoptilia islandici     | Staudinger                   | Marko Mutaner                                               | Finland       |                            | Enontekiö                        | 68,9970016E                                           | 20,7439994E |              |
| MM04137          | 658 | HM38692  | Pterophoridae | Pterophorinae  | Stenoptilia islandici     | Staudinger                   | Marko Mutaner                                               | Finland       |                            | Enontekiö                        | 68,9970016E                                           | 20,7439994E |              |
| MM04136          | 658 | HM38692  | Pterophoridae | Pterophorinae  | Stenoptilia islandici     | Staudinger                   | Marko Mutaner                                               | Finland       |                            | Enontekiö                        | 68,9970016E                                           | 20,7439994E |              |
| TLMF Lep 01768   | 658 | HQ36968  | Pterophoridae | Pterophorinae  | Stenoptilia mercantourica | Staudinger<br>Nel & Gibbeaux | Huemer P.                                                   | France        | Provence-Alpes-Cote d'Azur | Col Agnel                        | 44,6899936E                                           | 6,9844398E  |              |
| MM08501          | 658 | HM873931 | Psychidae     | Oiketiciinae   | Sterrhopterix standfussi  | Wocke                        | Marko Mutanen                                               | Finland       |                            | Kiminki                          | 65,07099915                                           | 25,72500038 |              |
| MM08502          | 658 | HM873932 | Psychidae     | Oiketiciinae   | Sterrhopterix standfussi  | Wocke                        | Marko Mutanen                                               | Finland       |                            | Kiminki                          | 65,07099915                                           | 25,72500038 |              |
| MM14127          | 658 | HM87590  | Psychidae     | Oiketiciinae   | Sterrhopterix standfussi  | Wocke                        | Marko Mutaner                                               | Finland       |                            | Tuupovaara                       | 62,375                                                | 30,9050006E |              |
| MM17516          | 658 | JF053984 | Psychidae     | Oiketiciinae   | Sterrhopterix standfussi  | Wocke                        | Airi Kallio                                                 | Finland       |                            | Vammala                          | 61,2459983E                                           | 22,90099907 |              |
| TLMF Lep 02751   | 658 | JF860274 | Psychidae     | Oiketiciinae   | Sterrhopterix standfussi  | Wocke                        | Schmid J.                                                   | Switzerland   | Graubunden                 | Platta, Pl. Pardatsch/ Medel Lu  | 46,6890009E                                           | 8,85400009E |              |
| MM09642          | 658 | HM874397 | Nepticulidae  | Nepticulinae   | Stigmella pretiosa        | Heinemann                    | Marko Mutanen, Tomi Mutanen, Panu Vaelimaeki, Petri hirvone | Finland       | Aland                      | Eckeröe                          | 60,27500153                                           | 19,57999992 |              |
| MM09643          | 658 | HM874398 | Nepticulidae  | Nepticulinae   | Stigmella pretiosa        | Heinemann                    | Marko Mutanen, Tomi Mutanen, Panu Vaelimaeki, Petri hirvone | Finland       | Aland                      | Eckeröe                          | 60,27500153                                           | 19,57999992 |              |
| TLMF Lep 0287    | 579 | JF960337 | Nepticulidae  | Nepticulinae   | Stigmella pretiosa        | Heinemann                    | Huemer P.                                                   | Austria       | Vorarlberg                 | Luenerkinne                      | 47,0579986E                                           | 9,77000045E |              |
| MM03414          | 658 | HQ057029 | Noctuidae     | Oncocnemidinae | Sympistis nigris          | Boisduval                    | Marko Mutaner                                               | Finland       | Lappi                      | Laponia enontekiensi             | 68,9970016E                                           | 20,7439994E |              |
| MM03415          | 658 | HQ057029 | Noctuidae     | Oncocnemidinae | Sympistis nigris          | Boisduval                    | Marko Mutaner                                               | Finland       | Lappi                      | Laponia enontekiensi             | 68,9970016E                                           | 20,7439994E |              |
| MM14552          | 658 | HM87616  | Noctuidae     | Oncocnemidinae | Sympistis nigris          | Boisduval                    | Marko Mutaner                                               | Finland       |                            | Enontekiö                        | 69,0630035E                                           | 21,1019992E |              |
| TLMF Lep 0184    | 658 | HQ96830  | Noctuidae     | Oncocnemidinae | Sympistis nigris          | Boisduval                    | Deutsch H.                                                  | Austria       |                            | Hochtor                          | 47,0833015E                                           | 12,84500027 |              |
| TLMF Lep 01841   | 658 | HQ968304 | Noctuidae     | Oncocnemidinae | Sympistis nigris          | Boisduval                    | Deutsch H.                                                  | Austria       | Tyrol                      | Karlsbader Huette                | 46,75999832                                           | 12,7986002  |              |
| TLMF Lep 02757   | 658 | JF860275 | Noctuidae     | Oncocnemidinae | Sympistis nigris          | Boisduval                    | Schmid J.                                                   | Switzerland   | Graubunden                 | Avers-Cresta, Cuchalner/Guggemue | 46,5019989                                            | 9,484999657 |              |
| TLMF Lep 03065   | 658 | JN275140 | Noctuidae     | Oncocnemidinae | Sympistis nigris          | Boisduval                    | Huemer P.                                                   | Austria       | Vorarlberg                 | Ung. Goepinger Huette, Gamsboder | 47,21749878                                           | 10,03470039 |              |
| 07PROBE-00082    | 658 | JX008349 | Noctuidae     | Oncocnemidinae | Sympistis zetterstedii    | Staudinger                   | P.D.N. Hebert                                               | Canada        | Manitoba                   | Churchill                        | 16 km E Churchill, Bird Cove, Rock Bluff A            | 58,77099991 | -93,84600067 |
| 07PROBE-00083    | 658 | JX008226 | Noctuidae     | Oncocnemidinae | Sympistis zetterstedii    | Staudinger                   | P.D.N. Hebert                                               | Canada        | Manitoba                   | Churchill                        | 16 km E Churchill, Bird Cove, Rock Bluff A            | 58,77099991 | -93,84600067 |
| 07PROBE-00084    | 658 | JX008434 | Noctuidae     | Oncocnemidinae | Sympistis zetterstedii    | Staudinger                   | P.D.N. Hebert                                               | Canada        | Manitoba                   | Churchill                        | 16 km E Churchill, Bird Cove, Rock Bluff A            | 58,77099991 | -93,84600067 |
| 07PROBE-00085    | 656 | JX008165 | Noctuidae     | Oncocnemidinae | Sympistis zetterstedii    | Staudinger                   | P.D.N. Hebert                                               | Canada        | Manitoba                   | Churchill                        | 16 km E Churchill, Bird Cove, Rock Bluff A            | 58,77099991 | -93,84600067 |
| 07PROBE-00131    | 657 | JX008373 | Noctuidae     | Oncocnemidinae | Sympistis zetterstedii    | Staudinger                   | S.VanRyswyk                                                 | Canada        | Manitoba                   | Churchill                        | 23 km E Churchill, Ramsay Cree                        | 58,72299951 | -93,80699921 |
| 07PROBE-00142    | 658 | JX008113 | Noctuidae     | Oncocnemidinae | Sympistis zetterstedii    | Staudinger                   | P.D.N. Hebert                                               | Canada        | Manitoba                   | Churchill                        | 16 km E Churchill, Bird Cove, Rock Bluff C            | 58,76699829 | -93,86799622 |
| 07PROBE-00143    | 658 | JX008118 | Noctuidae     | Oncocnemidinae | Sympistis zetterstedii    | Staudinger                   | P.D.N. Hebert                                               | Canada        | Manitoba                   | Churchill                        | 16 km E Churchill, Bird Cove, Rock Bluff C            | 58,76699829 | -93,86799622 |
| 07PROBE-00144    | 658 | JX008141 | Noctuidae     | Oncocnemidinae | Sympistis zetterstedii    | Staudinger                   | P.D.N. Hebert                                               | Canada        | Manitoba                   | Churchill                        | 16 km E Churchill, Bird Cove, Rock Bluff C            | 58,76699829 | -93,86799622 |
| 07PROBE-0052     | 655 | JX008270 | Noctuidae     | Oncocnemidinae | Sympistis zetterstedii    | Staudinger                   | J.deWaard                                                   | Canada        | Manitoba                   | Churchill                        | Town of Churchill                                     | 58,7669982E | -94,176002E  |
| 07PROBE-0390     | 658 | JX008306 | Noctuidae     | Oncocnemidinae | Sympistis zetterstedii    | Staudinger                   | P.D.N. Heber                                                | Canada        | Manitoba                   | Churchill                        | Town of Churchill, field S of Churchill train station | 58,7669982E | -94,176002E  |
| 07PROBE-0390     | 656 | JX008311 | Noctuidae     | Oncocnemidinae | Sympistis zetterstedii    | Staudinger                   | P.D.N. Heber                                                | Canada        | Manitoba                   | Churchill                        | 16 km E Churchill, Bird Cove                          | 58,7660015E | -93,85800171 |
| 07PROBE-0390     | 658 | JX008372 | Noctuidae     | Oncocnemidinae | Sympistis zetterstedii    | Staudinger                   | P.D.N. Heber                                                | Canada        | Manitoba                   | Churchill                        | 16 km E Churchill, Bird Cove                          | 58,7660015E | -93,85800171 |
| 07PROBE-1004     | 658 | JX008279 | Noctuidae     | Oncocnemidinae | Sympistis zetterstedii    | Staudinger                   | P.D.N. Heber                                                | Canada        | Manitoba                   | Churchill                        | 13 km E Churchill, Eastern Creel                      | 58,75500101 | -93,84400024 |
| 07PROBE-1005     | 658 | JX008295 | Noctuidae     | Oncocnemidinae | Sympistis zetterstedii    | Staudinger                   | P.D.N. Heber                                                | Canada        | Manitoba                   | Churchill                        | 13 km E Churchill, Eastern Creel                      | 58,75500101 | -93,84400024 |
| 07PROBE-1005     | 658 | JX008285 | Noctuidae     | Oncocnemidinae | Sympistis zetterstedii    | Staudinger                   | P.D.N. Heber                                                | Canada        | Manitoba                   | Churchill                        | 13 km E Churchill, Eastern Creel                      | 58,75500101 | -93,84400024 |
| 07PROBE-1005     | 658 | JX008417 | Noctuidae     | Oncocnemidinae | Sympistis zetterstedii    | Staudinger                   | P.D.N. Heber                                                | Canada        | Manitoba                   | Churchill                        | 13 km E Churchill, Eastern Creel                      | 58,75500101 | -93,84400024 |
| 07PROBE-1011     | 658 | JX008316 | Noctuidae     | Oncocnemidinae | Sympistis zetterstedii    | Staudinger                   | P.D.N. Heber                                                | Canada        | Manitoba                   | Churchill                        | 16 km E Churchill, tundra pond                        | 58,75500101 | -93,91500092 |
| 07PROBE-1011     | 658 | JX008451 | Noctuidae     | Oncocnemidinae | Sympistis zetterstedii    | Staudinger                   | P.D.N. Heber                                                | Canada        | Manitoba                   | Churchill                        | 16 km E Churchill, tundra pond                        | 58,75500101 | -93,91500092 |
| 07PROBE-1025     | 658 | JX008495 | Noctuidae     | Oncocnemidinae | Sympistis zetterstedii    | Staudinger                   | P.D.N. Heber                                                | Canada        | Manitoba                   | Churchill                        | 5 km E Churchill, Miss Piggy                          | 58,7599983E | -94,08599854 |
| 07PROBE-1088     | 658 | JX008406 | Noctuidae     | Oncocnemidinae | Sympistis zetterstedii    | Staudinger                   | P.D.N. Heber                                                | Canada        | Manitoba                   | Churchill                        | 23 km E Churchill, Ramsay Cree                        | 58,7309989E | -93,7799987E |
| 07PROBE-1068     | 658 | JX008292 | Noctuidae     | Oncocnemidinae | Sympistis zetterstedii    | Staudinger                   | P.D.N. Heber                                                | Canada        | Manitoba                   | Churchill                        | 23 km E Churchill, Ramsay Cree                        | 58,7309989E | -93,7799987E |
| 07WNP-1079       | 658 | JX008323 | Noctuidae     | Oncocnemidinae | Sympistis zetterstedii    | Staudinger                   | J.McGowan                                                   | Canada        | Manitoba                   | Churchill                        | 22 km E Churchill, CNSC                               | 58,7299995E | -93,8199996E |
| 07WNP-1080       | 658 | JX008463 | Noctuidae     | Oncocnemidinae | Sympistis zetterstedii    | Staudinger                   | J.McGowan                                                   | Canada        | Manitoba                   | Churchill                        | 16 km E Churchill, Bird Cove, Rock Bluff B            | 58,7700004E | -93,84300232 |
| 07WNP-10816      | 658 | JX008398 | Noctuidae     | Oncocnemidinae | Sympistis zetterstedii    | Staudinger                   | J.McGowan                                                   | Canada        | Manitoba                   | Churchill                        | Wapusk National Park, unspecified locality            | 58,6430015E | -93,22599792 |
| 07WNP-10817      | 658 | JX008440 | Noctuidae     | Oncocnemidinae | Sympistis zetterstedii    | Staudinger                   | J.McGowan                                                   | Canada        | Manitoba                   | Churchill                        | Wapusk National Park, unspecified locality            | 58,6430015E | -93,22599792 |
| 09PROBE-09511    | 640 | HM375771 | Noctuidae     | Oncocnemidinae | Sympistis zetterstedii    | Staudinger                   | P.D.N. Heber                                                | Canada        | Manitoba                   | Churchill                        | 22 km E Churchill, CNSC                               | 58,7379989E | -93,81900024 |
| 09PROBE-0957     | 658 | HM375822 | Noctuidae     | Oncocnemidinae | Sympistis zetterstedii    | Staudinger                   | P.D.N. Heber                                                | Canada        | Manitoba                   | Churchill                        | 14 km SW Churchill, Button Bay                        | 58,80500031 | -94,2139968E |
| 09PROBE-0957     | 636 | HM375822 | Noctuidae     | Oncocnemidinae | Sympistis zetterstedii    | Staudinger                   | P.D.N. Heber                                                | Canada        | Manitoba                   | Churchill                        | 14 km SW Churchill, Button Bay                        | 58,80500031 | -94,2139968E |
| CHU06-COL-104    | 620 | JX008243 | Noctuidae     | Oncocnemidinae | Sympistis zetterstedii    | Staudinger                   | Arctic & Boreal Entomology                                  | Canada        | Manitoba                   | Churchill                        | 16 km E Churchill, krummholz formation                | 58,75400162 | -93,91300201 |
| CHU06-COL-111    | 489 | JX008382 | Noctuidae     | Oncocnemidinae | Sympistis zetterstedii    | Staudinger                   | Arctic & Boreal Entomology                                  | Canada        | Manitoba                   | Churchill                        | 11 km S Churchill, Goose Cree                         | 58,6629982E | -94,1669988E |
| CHU06-COL-158    | 658 | JX008465 | Noctuidae     | Oncocnemidinae | Sympistis zetterstedii    | Staudinger                   | Arctic & Boreal Entomology                                  | Canada        | Manitoba                   | Churchill                        | 16 km E Churchill, krummholz formation                | 58,75400162 | -93,91300201 |
| CHU06-COL-159    | 658 | JX008277 | Noctuidae     | Oncocnemidinae | Sympistis zetterstedii    | Staudinger                   | Arctic & Boreal Entomology                                  | Canada        | Manitoba                   | Churchill                        | 16 km E Churchill, krummholz formation                | 58,75400162 | -93,91300201 |
| CHU06-COL-161    | 654 | JX008431 | Noctuidae     | Oncocnemidinae | Sympistis zetterstedii    | Staudinger                   | Arctic & Boreal Entomology                                  | Canada        | Manitoba                   | Churchill                        | 16 km E Churchill, krummholz formation                | 58,75400162 | -93,91300201 |
| CHU06-COL-163    | 658 | JX008253 | Noctuidae     | Oncocnemidinae | Sympistis zetterstedii    | Staudinger                   | Arctic & Boreal Entomology                                  | Canada        | Manitoba                   | Churchill                        | 16 km E Churchill, krummholz formation                | 58,75400162 | -93,91300201 |
| CHU06-COL-166    | 645 | JX008183 | Noctuidae     | Oncocnemidinae | Sympistis zetterstedii    | Staudinger                   | Arctic & Boreal Entomology                                  | Canada        | Manitoba                   | Churchill                        | 16 km E Churchill, krummholz formation                | 58,75400162 | -93,91300201 |
| CHU06-LEP-027    | 658 | JX008248 | Noctuidae     | Oncocnemidinae | Sympistis zetterstedii    | Staudinger                   | Arctic & Boreal Entomology                                  | Canada        | Manitoba                   | Churchill                        | 23 km E Churchill, Ramsay Cree                        | 58,7309989E | -93,7819976E |
| CNCNoctuidae1069 | 573 | JX008218 | Noctuidae     | Oncocnemidinae | Sympistis zetterstedii    | Staudinger                   | H. Hense                                                    | Canada        | Manitoba                   | Churchill                        | 24 km E of Churchill                                  |             |              |
| CNCNoctuidae1069 | 562 | JX008154 | Noctuidae     | Oncocnemidinae | Sympistis zetterstedii    | Staudinger                   | H. Hense                                                    | Canada        | Manitoba                   | Churchill                        | 24 km E of Churchill                                  |             |              |
| CNCNoctuidae1069 | 517 | JX008216 | Noctuidae     | Oncocnemidinae | Sympistis zetterstedii    | Staudinger                   | H. Hense                                                    | Canada        | Manitoba                   | Churchill                        | 24 km E of Churchill                                  |             |              |
| CNCNoctuidae1069 | 586 | JX008112 | Noctuidae     | Oncocnemidinae | Sympistis zetterstedii    | Staudinger                   | D. Bowmar                                                   | United States | Colorado                   | Loveland Pass                    |                                                       |             |              |
| CNCNoctuidae1069 | 614 | JX008464 | Noctuidae     | Oncocnemidinae | Sympistis zetterstedii    | Staudinger                   | J. Troubridge                                               | United States | British Columbia           | Pink Mountair                    |                                                       |             |              |
| CNCNoctuidae1070 | 477 | JX008254 | Noctuidae     | Oncocnemidinae | Sympistis zetterstedii    | Staudinger                   | D. Bowmar                                                   | United States | Colorado                   | Loveland Pass                    |                                                       |             |              |
| CNCNoctuidae1070 | 551 | JX008194 | Noctuidae     | Oncocnemidinae | Sympistis zetterstedii    | Staudinger                   | J. Troubridge                                               | United States | British Columbia           | Pink Mountair                    |                                                       |             |              |

|                |     |           |             |                |                        |                         |                                                 |             |                 |                                                                     |                                      |                         |                                                  |              |               |
|----------------|-----|-----------|-------------|----------------|------------------------|-------------------------|-------------------------------------------------|-------------|-----------------|---------------------------------------------------------------------|--------------------------------------|-------------------------|--------------------------------------------------|--------------|---------------|
| LEP037938      | 658 | JX008449  | Noctuidae   | Oncocnemidinae | Sympistis zetterstedii | Staudinger              | C. S. Guppy & G.E. Hutchings                    | Canada      | Yukon Territory | Swede Dome, Top of the World Hwy Km. 64, rock rubble                |                                      |                         |                                                  |              |               |
| LEP037946      | 658 | JX008156  | Noctuidae   | Oncocnemidinae | Sympistis zetterstedii | Staudinger              | C. S. Guppy & G.E. Hutchings                    | Canada      | Yukon Territory | Dempster Hwy. Km. 152.8 (E of Hwy.), limestone rock rubble & tundra |                                      |                         |                                                  |              |               |
| LEP037947      | 658 | JX008347  | Noctuidae   | Oncocnemidinae | Sympistis zetterstedii | Staudinger              | C. S. Guppy & G.E. Hutchings                    | Canada      | Yukon Territory | Mt. Klotz (SW. of ), rock rubble slope                              |                                      |                         |                                                  |              |               |
| LEP037955      | 646 | JX008140  | Noctuidae   | Oncocnemidinae | Sympistis zetterstedii | Staudinger              | C. Schmidt                                      | Canada      | Yukon Territory | Montana Mtn., 10 km. S.                                             |                                      |                         |                                                  |              |               |
| LEP037956      | 658 | JX008381  | Noctuidae   | Oncocnemidinae | Sympistis zetterstedii | Staudinger              | C. Schmidt                                      | Canada      | Yukon Territory | Carcross, dry tundra                                                |                                      |                         |                                                  |              |               |
| LEP037957      | 658 | JX008107  | Noctuidae   | Oncocnemidinae | Sympistis zetterstedii | Staudinger              | C. Schmidt                                      | Canada      | Yukon Territory | Montana Mtn., 10 km. S.                                             |                                      |                         |                                                  |              |               |
| LEP037958      | 658 | JX008446  | Noctuidae   | Oncocnemidinae | Sympistis zetterstedii | Staudinger              | C. Schmidt                                      | Canada      | Yukon Territory | Carcross, dry tundra                                                |                                      |                         |                                                  |              |               |
| LEP037959      | 658 | JX008293  | Noctuidae   | Oncocnemidinae | Sympistis zetterstedii | Staudinger              | C. Schmidt                                      | Canada      | Yukon Territory | Montana Mtn., 10 km. S.                                             |                                      |                         |                                                  |              |               |
| MM15761        | 456 | JX034648  | Sesiinae    | Sesiinae       | Synanthedon polaris    | Staudinger              | Tomii Mutanen, Panu Vaelimae                    | Finland     |                 |                                                                     | Enontekiö                            | 68,9970016E             | 20,7439994E                                      |              |               |
| MM18776        | 658 | JX034613  | Sesiinae    | Sesiinae       | Synanthedon polaris    | Staudinger              | Reima Leinoner                                  | Finland     |                 |                                                                     | Utsjok                               | 69,959990E              | 27,966990E                                       |              |               |
| MM18785        | 658 | JF854617  | Sesiinae    | Sesiinae       | Synanthedon polaris    | Staudinger              | Reima Leinoner                                  | Finland     | 18-Jul-2003     |                                                                     | Suomussalmi                          | 65,0220031E             | 29,3339996E                                      |              |               |
| TLMF Lep 0275f | 658 | JF860277  | Sesiinae    | Sesiinae       | Synanthedon polaris    | Staudinger              | Schmid J.                                       | Switzerland | 03-Jun-1996     |                                                                     | Graubunden                           | 46,4410018E             | 9,98499965E                                      |              |               |
| MM02565        | 658 | HM87161f  | Gelechiidae | Gelechiinae    | Synopocma karvonen     | Hackman                 | Marko Mutanen, Panu Vaelimae                    | Finland     |                 |                                                                     | Savonia australis                    | 61,10800171E            | 28,7989997E                                      |              |               |
| MM02566        | 658 | JX034569  | Gelechiidae | Gelechiinae    | Synopocma karvonen     | Hackman                 | Marko Mutanen, Panu Vaelimae                    | Finland     |                 |                                                                     | Savonia australis                    | 61,10800171E            | 28,7989997E                                      |              |               |
| MM02567        | 658 | JX034695  | Gelechiidae | Gelechiinae    | Synopocma karvonen     | Hackman                 | Marko Mutanen, Panu Vaelimae                    | Finland     |                 |                                                                     | Savonia australis                    | 61,10800171E            | 28,7989997E                                      |              |               |
| MM06354        | 658 | HM873221  | Gelechiidae | Gelechiinae    | Synopocma karvonen     | Hackman                 | Marko Mutanen, Anttoni Mutanen, Nestori Mutaner | Finland     | 29-Jun-2007     |                                                                     | Lapponia inarenensis                 | 69,8820037E             | 27                                               |              |               |
| MM09971        | 658 | HM87450f  | Gelechiidae | Gelechiinae    | Synopocma karvonen     | Hackman                 | Marko Mutaner                                   | Finland     | 17-Jun-2008     |                                                                     | Karelia borealis                     | 61,8989982E             | 29,7970008E                                      |              |               |
| MM10005        | 658 | JF853457  | Gelechiidae | Gelechiinae    | Synopocma karvonen     | Hackman                 | Marko Mutaner                                   | Finland     | 16-Jun-2008     |                                                                     | Karelia borealis                     | 62,0419983E             | 30,25                                            |              |               |
| MM10034        | 658 | JF853460  | Gelechiidae | Gelechiinae    | Synopocma karvonen     | Hackman                 | Marko Mutaner                                   | Finland     | 18-Jun-2008     |                                                                     | Savonia australis                    | 61,1349983E             | 28,7989992E                                      |              |               |
| MM14076        | 658 | HM87537f  | Gelechiidae | Gelechiinae    | Synopocma karvonen     | Hackman                 | Marko Mutaner                                   | Finland     |                 |                                                                     | Karelia borealis                     | 62,375                  | 30,905008E                                       |              |               |
| MM18247        | 658 | JF854240  | Gelechiidae | Gelechiinae    | Synopocma karvonen     | Hackman                 | Marko Mutaner                                   | Finland     | 27-Jun-2002     |                                                                     | Lapponia inarenensis                 | 69,2855987E             | 25,7339000E                                      |              |               |
| MM18246        | 658 | JF854241  | Gelechiidae | Gelechiinae    | Synopocma karvonen     | Hackman                 | Marko Mutaner                                   | Finland     | 29-Jun-2007     |                                                                     | Lapponia inarenensis                 | 69,8817977E             | 27                                               |              |               |
| TLMF Lep 0275f | 658 | JF860276  | Gelechiidae | Gelechiinae    | Synopocma karvonen     | Hackman                 | Schmid J.                                       | Switzerland | 14-Jun-2008     |                                                                     | Graubunden                           | 46,626998E              | 9,75599956E                                      |              |               |
| MM00072        | 658 | HM39635f  | Noctuidae   | Plusinae       | Syngrapha hoehenwarthi | Hoehenwarth             | Marko Mutaner                                   | Finland     |                 |                                                                     | Umg. Prasegras/ Berguer              | 68,9970016E             | 20,7439994E                                      |              |               |
| MM04097        | 658 | HM39688f  | Noctuidae   | Plusinae       | Syngrapha hoehenwarthi | Hoehenwarth             | Marko Mutaner                                   | Finland     |                 |                                                                     | Enontekiö                            | 68,9970016E             | 20,7439994E                                      |              |               |
| MM05905        | 647 | HQ257032z | Noctuidae   | Plusinae       | Syngrapha hoehenwarthi | Hoehenwarth             | Panu Vaelimae                                   | Finland     | 03-Jul-2007     |                                                                     | Lapponia inarenensis                 | 69,375                  | 25,7290006E                                      |              |               |
| TLMF Lep 0017z | 657 | GU68915f  | Noctuidae   | Plusinae       | Syngrapha hoehenwarthi | Hoehenwarth             | Huemer P.                                       | Switzerland | 25-Aug-2008     |                                                                     | Graubunden                           | 46,5419998E             | 10,4340000E                                      |              |               |
| TLMF Lep 0017z | 657 | GU689153  | Noctuidae   | Plusinae       | Syngrapha hoehenwarthi | Hoehenwarth             | Huemer P.                                       | Austria     | 31-Jul-2006     |                                                                     | Salzburg                             | Hohe Tauern             | Rauris: Grosse Glocknerstrasse, Hochtor - PG-004 | 47,08300018E | 12,8439998E   |
| TLMF Lep 0283z | 658 | JF860314  | Noctuidae   | Plusinae       | Syngrapha hoehenwarthi | Hoehenwarth             | Huemer P. & Eriebach S                          | Switzerland | 11-Apr-2005     |                                                                     | Graubunden                           | Umbrailpass             | 46,5419998E                                      | 10,4340000E  |               |
| TLMF Lep 0283z | 658 | JF860315  | Noctuidae   | Plusinae       | Syngrapha hoehenwarthi | Hoehenwarth             | Huemer P. & Eriebach S                          | Switzerland | 11-Apr-2005     |                                                                     | Graubunden                           | Umbrailpass             | 46,5419998E                                      | 10,4340000E  |               |
| CNCLPE0002660f | 634 | JX008119  | Douglasidae | Douglasinae    | Tinagma dryadit        | Staudinger              | JF Landry & G Poh                               | Canada      | Yukon Territory | Whitehorse                                                          | Grey Mtn summi                       | 60,6749992E             | -134,90400E                                      |              |               |
| CNCLPE0002660f | 634 | JX008217  | Douglasidae | Douglasinae    | Tinagma dryadit        | Staudinger              | JF Landry & G Poh                               | Canada      | Yukon Territory | Whitehorse                                                          | Grey Mtn summi                       | 60,6749992E             | -134,90400E                                      |              |               |
| CNCLPE0002660f | 634 | JX008412  | Douglasidae | Douglasinae    | Tinagma dryadit        | Staudinger              | JF Landry & G Poh                               | Canada      | Yukon Territory | Whitehorse                                                          | Grey Mtn summi                       | 60,6749992E             | -134,90400E                                      |              |               |
| CNCLPE0002660f | 632 | JX008310  | Douglasidae | Douglasinae    | Tinagma dryadit        | Staudinger              | JF Landry & G Poh                               | Canada      | Yukon Territory | Whitehorse                                                          | Grey Mtn summi                       | 60,6749992E             | -134,90400E                                      |              |               |
| CNCLPE0002660f | 632 | JX008229  | Douglasidae | Douglasinae    | Tinagma dryadit        | Staudinger              | JF Landry & G Poh                               | Canada      | Yukon Territory | Whitehorse                                                          | Grey Mtn summi                       | 60,6749992E             | -134,90400E                                      |              |               |
| CNCLPE0002660f | 632 | JX008435  | Douglasidae | Douglasinae    | Tinagma dryadit        | Staudinger              | JF Landry & G Poh                               | Canada      | Yukon Territory | Whitehorse                                                          | Grey Mtn summi                       | 60,6749992E             | -134,90400E                                      |              |               |
| CNCLPE0002660f | 618 | JX008325  | Douglasidae | Douglasinae    | Tinagma dryadit        | Staudinger              | JF Landry & G Poh                               | Canada      | Yukon Territory | Whitehorse                                                          | Grey Mtn summi                       | 60,6749992E             | -134,90400E                                      |              |               |
| CNCLPE0002660f | 634 | JX008215  | Douglasidae | Douglasinae    | Tinagma dryadit        | Staudinger              | JF Landry & G Poh                               | Canada      | Yukon Territory | Whitehorse                                                          | Grey Mtn summi                       | 60,6749992E             | -134,90400E                                      |              |               |
| CNCLPE0002661f | 634 | JX008304  | Douglasidae | Douglasinae    | Tinagma dryadit        | Staudinger              | JF Landry & G Poh                               | Canada      | Yukon Territory | Whitehorse                                                          | Grey Mtn summi                       | 60,6749992E             | -134,90400E                                      |              |               |
| CNCLPE0002661f | 634 | JX008437  | Douglasidae | Douglasinae    | Tinagma dryadit        | Staudinger              | JF Landry & G Poh                               | Canada      | Yukon Territory | Whitehorse                                                          | Grey Mtn summi                       | 60,6749992E             | -134,90400E                                      |              |               |
| CNCLPE0002661f | 634 | JX008197  | Douglasidae | Douglasinae    | Tinagma dryadit        | Staudinger              | JF Landry & G Poh                               | Canada      | Yukon Territory | Whitehorse                                                          | Grey Mtn summi                       | 60,6749992E             | -134,90400E                                      |              |               |
| CNCLPE0002661f | 634 | JX008383  | Douglasidae | Douglasinae    | Tinagma dryadit        | Staudinger              | JF Landry & G Poh                               | Canada      | Yukon Territory | Whitehorse                                                          | Grey Mtn summi                       | 60,6749992E             | -134,90400E                                      |              |               |
| CNCLPE0002661f | 634 | JX008322  | Douglasidae | Douglasinae    | Tinagma dryadit        | Staudinger              | JF Landry & G Poh                               | Canada      | Yukon Territory | Whitehorse                                                          | Grey Mtn summi                       | 60,6749992E             | -134,90400E                                      |              |               |
| CNCLPE0002661f | 632 | JX008168  | Douglasidae | Douglasinae    | Tinagma dryadit        | Staudinger              | JF Landry & G Poh                               | Canada      | Yukon Territory | Whitehorse                                                          | Grey Mtn summi                       | 60,6749992E             | -134,90400E                                      |              |               |
| CNCLPE0002661f | 634 | JX008263  | Douglasidae | Douglasinae    | Tinagma dryadit        | Staudinger              | JF Landry & G Poh                               | Canada      | Yukon Territory | Whitehorse                                                          | Grey Mtn summi                       | 60,6749992E             | -134,90400E                                      |              |               |
| CNCLPE0002661f | 634 | JX008160  | Douglasidae | Douglasinae    | Tinagma dryadit        | Staudinger              | JF Landry & G Poh                               | Canada      | Yukon Territory | Whitehorse                                                          | Grey Mtn summi                       | 60,6749992E             | -134,90400E                                      |              |               |
| CNCLPE0002661f | 634 | JX008294  | Douglasidae | Douglasinae    | Tinagma dryadit        | Staudinger              | JF Landry & G Poh                               | Canada      | Yukon Territory | Whitehorse                                                          | Grey Mtn summi                       | 60,6749992E             | -134,90400E                                      |              |               |
| CNCLPE0002661f | 634 | JX008359  | Douglasidae | Douglasinae    | Tinagma dryadit        | Staudinger              | JF Landry & G Poh                               | Canada      | Yukon Territory | Whitehorse                                                          | Grey Mtn summi                       | 60,6749992E             | -134,90400E                                      |              |               |
| CNCLPE0002662f | 610 | JX008201  | Douglasidae | Douglasinae    | Tinagma dryadit        | Staudinger              | JF Landry & G Poh                               | Canada      | Yukon Territory | Whitehorse                                                          | Grey Mtn summi                       | 60,6749992E             | -134,90400E                                      |              |               |
| CNCLPE0002662f | 634 | JX008460  | Douglasidae | Douglasinae    | Tinagma dryadit        | Staudinger              | JF Landry & G Poh                               | Canada      | Yukon Territory | Whitehorse                                                          | Grey Mtn summi                       | 60,6749992E             | -134,90400E                                      |              |               |
| CNCLPE0002662f | 634 | JX008144  | Douglasidae | Douglasinae    | Tinagma dryadit        | Staudinger              | JF Landry & G Poh                               | Canada      | Yukon Territory | Whitehorse                                                          | Grey Mtn summi                       | 60,6749992E             | -134,90400E                                      |              |               |
| CNCLPE0002662f | 634 | JX008400  | Douglasidae | Douglasinae    | Tinagma dryadit        | Staudinger              | JF Landry & G Poh                               | Canada      | Yukon Territory | Whitehorse                                                          | Grey Mtn summi                       | 60,6749992E             | -134,90400E                                      |              |               |
| MM00087        | 658 | HM39636f  | Douglasidae | Douglasinae    | Tinagma dryadit        | Staudinger              | Marko Mutaner                                   | Finland     |                 |                                                                     | Enontekiö                            | 68,9970016E             | 20,7439994E                                      |              |               |
| MM03964        | 658 | HQ257030f | Douglasidae | Douglasinae    | Tinagma dryadit        | Staudinger              | Marko Mutaner                                   | Finland     | 05-Jul-2006     |                                                                     | Lappi                                | Lapponia enontekiensis  | 68,9970016E                                      | 20,7439994E  |               |
| MM03965        | 658 | HQ257030f | Douglasidae | Douglasinae    | Tinagma dryadit        | Staudinger              | Marko Mutaner                                   | Finland     | 05-Jul-2006     |                                                                     | Lappi                                | Lapponia enontekiensis  | 68,9970016E                                      | 20,7439994E  |               |
| TLMF Lep 0276z | 658 | JF860280  | Douglasidae | Douglasinae    | Tinagma dryadit        | Staudinger              | Schmid J.                                       | Switzerland | 07-Jul-2006     |                                                                     | Graubunden                           | Alp Mora - Bargis/ Trir | 46,592998E                                       | 10,2880011E  |               |
| MM01862        | 658 | HM38685f  | Crambidae   | Spiromelinae   | Udea decrepitalis      | Herrich-Schäffer        | Marko Mutanen, Panu Vaelimae                    | Finland     |                 |                                                                     | Imatra                               | 61,10800171E            | 28,7989997E                                      |              |               |
| MM01863        | 658 | HM38685f  | Crambidae   | Spiromelinae   | Udea decrepitalis      | Herrich-Schäffer        | Marko Mutanen, Panu Vaelimae                    | Finland     |                 |                                                                     | Imatra                               | 61,10800171E            | 28,7989997E                                      |              |               |
| MM02941        | 658 | HM871750  | Crambidae   | Spiromelinae   | Udea decrepitalis      | Herrich-Schäffer        | Marko Mutanen                                   | Finland     |                 |                                                                     | Ostrobotnina borealis pars australis | 65,07099915E            | 25,7250003E                                      |              |               |
| TLMF Lep 0082z | 658 | HQ968197  | Crambidae   | Spiromelinae   | Udea decrepitalis      | Herrich-Schäffer        | Huemer P                                        | Austria     | 04-Jul-2006     |                                                                     | Steiermark                           | Turracher Hoehle        | 46,9280014E                                      | 13,8680000E  |               |
| TLMF Lep 0082z | 612 | HQ968198  | Crambidae   | Spiromelinae   | Udea decrepitalis      | Herrich-Schäffer        | Huemer P                                        | Austria     | 04-Jul-2006     |                                                                     | Steiermark                           | Turracher Hoehle        | 46,9280014E                                      | 13,8680000E  |               |
| TLMF Lep 0082z | 612 | HQ968201  | Crambidae   | Spiromelinae   | Udea decrepitalis      | Herrich-Schäffer        | Huemer P                                        | Austria     | 01-Jul-2006     |                                                                     | Karnten                              | Umg. Zollnerseeheutt    | 46,8059989E                                      | 13,0710001E  |               |
| TLMF Lep 0276z | 658 | JF860281  | Crambidae   | Spiromelinae   | Udea elutalis          | Dennis & Schiffermüller | Schmid J.                                       | Switzerland | 22-Jun-2006     |                                                                     | Graubunden                           | Relafawald/ Vals        | 46,6100000E                                      | 9,19400024E  |               |
| MM19185        | 622 | JF854517  | Crambidae   | Spiromelinae   | Udea elutalis          | Dennis & Schiffermüller | Marko Mutanen                                   | Russia      | 14-Jul-2003     |                                                                     | Cheliabinsk oblas                    | Miss                    |                                                  |              |               |
| MM19186        | 658 | JF854518  | Crambidae   | Spiromelinae   | Udea elutalis          | Dennis & Schiffermüller | Karl Nupponer                                   | Russia      | 14-Jul-2003     |                                                                     | Cheliabinsk oblas                    | Miss                    |                                                  |              |               |
| MM19306        | 658 | JX034659  | Crambidae   | Spiromelinae   | Udea elutalis          | Dennis & Schiffermüller | Karl Nupponer                                   | Finland     |                 |                                                                     | Karelyya                             | 60,571998E              | 27,20100021E                                     |              |               |
| TLMF Lep 0276z | 658 | JF860282  | Crambidae   | Spiromelinae   | Udea elutalis          | Dennis & Schiffermüller | Schmid J.                                       | Switzerland | 30-Jun-2008     |                                                                     | Graubunden                           | Santavanna              | 46,6069984E                                      | 10,42399979E |               |
| 07PROBE-0007z  | 658 | JX008454  | Crambidae   | Spiromelinae   | Udea inquitatalis      | Liengj & Zelle          | P.D.N. Heber                                    | Canada      | 14-Jul-2007     |                                                                     | Manitoba                             | Churchill               | 23 km E Churchill, Ramsay Cree                   | 58,7229995E  | -93,80699921E |
| 07PROBE-0049H  | 658 | JX008454  | Crambidae   | Spiromelinae   | Udea inquitatalis      | Liengj & Zelle          | J.deWaard                                       | Canada      | 13-Jul-2007     |                                                                     | Manitoba                             | Churchill               | Town of Churchill                                | 58,7669982E  | -93,80699921E |
| 07PROBE-0051f  | 655 | JX008312  | Crambidae   | Spiromelinae   | Udea inquitatalis      | Liengj & Zelle          | J.deWaard                                       | Canada      | 13-Jul-2007     |                                                                     | Manitoba                             | Churchill               | Town of Churchill                                | 58,7669982E  | -94,1776002E  |
| 07PROBE-0060f  | 658 | JX008353  | Crambidae   | Spiromelinae   | Udea inquitatalis      | Liengj & Zelle          | P.D.N. Heber                                    | Canada      | 15-Jul-2007     |                                                                     | Manitoba                             | Churchill               | 26 km SE Churchill, Twin Lake                    | 58,6319999E  | -93,81900024E |
| 07PROBE-1023f  | 652 | JX008484  | Crambidae   | Spiromelinae   | Udea inquitatalis      | Liengj & Zelle          | P.D.N. Heber                                    | Canada      | 21-Jul-2007     |                                                                     | Manitoba                             | Churchill               | Town of Churchill                                | 58,76900101E | -94,17719970E |
| 07PROBE-1023z  | 645 | JX008108  | Crambidae   | Spiromelinae   | Udea inquitatalis      | Liengj & Zelle          | P.D.N. Heber                                    | Canada      | 21-Jul-2007     |                                                                     | Manitoba                             | Churchill               | Town of Churchill                                | 58,76900101E | -94,17719970E |
| 07PROBE-1075z  | 658 | JX008364  | Crambidae   | Spiromelinae   | Udea inquitatalis      | Liengj & Zelle          | P.D.N. Heber                                    | Canada      | 23-Jul-2007     |                                                                     | Manitoba                             | Churchill               | 26 km SE Churchill, Twin Lake                    | 58,63000101E | -93,81900024E |
|                |     |           |             |                |                        |                         |                                                 |             |                 |                                                                     |                                      |                         |                                                  |              |               |

|                  |     |           |             |              |                         |                     |                                                               |             |               |                  |                                      |                                                       |                                          |             |              |              |
|------------------|-----|-----------|-------------|--------------|-------------------------|---------------------|---------------------------------------------------------------|-------------|---------------|------------------|--------------------------------------|-------------------------------------------------------|------------------------------------------|-------------|--------------|--------------|
| CHU06-COL-21f    | 658 | JX008187  | Crambidae   | Spilomelinae | Udea inquinatali:       | Lienig & Zelle      | Arctic & Boreal Entomology                                    | 10-Aug-2006 | Canada        | Manitoba         | Churchill                            | 23 km E Churchill, Ramsay Cree                        | Small Creek                              | 58,7309989E | -93,7799987E |              |
| MM04133          | 658 | HM38692f  | Crambidae   | Spilomelinae | Udea inquinatali:       | Lienig & Zelle      | Marko Mutanen                                                 |             | Finland       |                  |                                      |                                                       | Enontekio                                | 68,9970016E | 20,7439994E  |              |
| MM04136          | 658 | HM38692f  | Crambidae   | Spilomelinae | Udea inquinatali:       | Lienig & Zelle      | Marko Mutanen                                                 |             | Finland       |                  |                                      |                                                       | Enontekio                                | 68,9970016E | 20,7439994E  |              |
| MM1458f          | 658 | HQ3570404 | Crambidae   | Spilomelinae | Udea inquinatali:       | Lienig & Zelle      | Marko Mutanen                                                 |             | Finland       |                  |                                      |                                                       | Enontekio                                | 68,9970016E | 20,7439994E  |              |
| TLMF Lep 0085f   | 658 | HQ38692f  | Crambidae   | Spilomelinae | Udea inquinatali:       | Lienig & Zelle      | Huemer P.                                                     | 01-Jul-2006 | Austria       | Karnten          | Lapponia enontekiensi                |                                                       | Umg. Zollnerseeuett                      | 46,8059989E | 13,0710001E  |              |
| TLMF Lep 0085f   | 658 | HQ968231f | Crambidae   | Spilomelinae | Udea inquinatali:       | Lienig & Zelle      | Huemer P.                                                     | 02-Jul-2006 | Austria       | Karnten          |                                      |                                                       | Umg. Zollnerseeuett                      | 46,8059989E | 13,0710001E  |              |
| TLMF Lep 0283f   | 658 | JF860316  | Crambidae   | Spilomelinae | Udea inquinatali:       | Lienig & Zelle      | Huemer P.                                                     | 03-Jul-2006 | Austria       | Vorarlberg       |                                      |                                                       | Partenen, N Vermuntstause                | 46,9389911E | 10,0570001E  |              |
| MM06605          | 658 | HM873360  | Crambidae   | Spilomelinae | Udea nebulalis          | Hübner              | Tomi Mutanen, Marko Mutanen, Nestori Mutanen, Anttoni Mutanen | 05-Jul-2007 | Finland       |                  | Karelia borealis                     |                                                       | Ilomantsi                                | 62,5099983E | 30,8840007E  |              |
| MM08327          | 658 | HM873870  | Crambidae   | Spilomelinae | Udea nebulalis          | Hübner              | Marko Mutanen                                                 |             | Finland       |                  | Ostrobottnia borealis pars borealis  |                                                       | Tornio                                   | 65,8980026E | 24,4549999E  |              |
| MM1386E          | 642 | HM38707f  | Crambidae   | Spilomelinae | Udea nebulalis          | Hübner              | M. Mutaner                                                    |             | Finland       |                  |                                      |                                                       | Tornio                                   | 65,8980026E | 24,4549999E  |              |
| TLMF Lep 00569   | 658 | HM381411  | Crambidae   | Spilomelinae | Udea nebulalis          | Hübner              | Huemer P.                                                     | 20-Jul-2009 | Italy         |                  | Belluno                              |                                                       | Passo di Valparola E - Passo Falzareoc   | 46,5223999  | 12,0069999E  |              |
| TLMF Lep 00914   | 658 | HM381486  | Crambidae   | Spilomelinae | Udea nebulalis          | Hübner              | Huemer P.                                                     | 29-May-2009 | Austria       | Vorarlberg       |                                      |                                                       | Sonntag, Buchboden, S Unter- Ueberlufalp | 47,25099945 | 9,970999718  |              |
| TLMF Lep 0170f   | 658 | HQ96890E  | Crambidae   | Spilomelinae | Udea nebulalis          | Hübner              | Huemer P.                                                     | 09-Aug-2011 | Slovenia      |                  |                                      |                                                       | Veliki Mangar                            | 46,4384994E | 13,6352996E  |              |
| TLMF Lep 0207f   | 658 | JF859663  | Crambidae   | Spilomelinae | Udea nebulalis          | Hübner              | Huemer P.                                                     | 01-Jul-2011 | Italy         | South Tyro       |                                      |                                                       | Ritten/ Obgruenwal                       | 46,5970001E | 11,4300001E  |              |
| TLMF Lep 0276f   | 658 | JF860283  | Crambidae   | Spilomelinae | Udea nebulalis          | Hübner              | Schmid J.                                                     | 25-Jul-2006 | Switzerland   | Graubunder       |                                      |                                                       | Nagens, Uaul Gonda/ Laa                  | 46,8479995E | 9,22599983E  |              |
| 07PROBE-1069f    | 658 | JX008448  | Geometridae | Larentinae   | Xanthorhoe alticolat:   | Barnes & McDunnough | P.D.N. Heber                                                  |             | Canada        | Manitoba         | Churchill                            | unspecified locality                                  | (general coordinate)                     | 58,7400016E | -93,8199996E |              |
| 07PROBE-1092f    | 658 | JX008135  | Geometridae | Larentinae   | Xanthorhoe alticolat:   | Barnes & McDunnough | P.D.N. Heber                                                  |             | Canada        | Manitoba         | Churchill                            | unspecified locality                                  | (general coordinate)                     | 58,7400016E | -93,8199996E |              |
| 08BBLEP-04216    | 658 | JX008298  | Geometridae | Larentinae   | Xanthorhoe alticolata   | Barnes & McDunnough | J.Straka,J.Cossey                                             | 23-Jul-2008 | Canada        | Alberta          | Banff                                | Banff Nat. Park - Cave and Basin Area                 | Spring-fed marsh/meadow                  | 51,17100143 | -115,5879974 |              |
| 08BBLEP-04262    | 658 | JX008257  | Geometridae | Larentinae   | Xanthorhoe alticolata   | Barnes & McDunnough | J.Straka,J.Cossey                                             | 04-Aug-2008 | Canada        | Alberta          | Banff                                | Banff Nat. Park - Johnson Lake Area                   | Meadow, beside creek and lake            | 51,1980018E | -115,4789963 |              |
| 08BBLEP-04446    | 636 | JX008476  | Geometridae | Larentinae   | Xanthorhoe alticolata   | Barnes & McDunnough | J.Straka,J.Cossey                                             | 31-Jul-2008 | Canada        | Alberta          | Banff                                | Banff Nat. Park - Cave and Basin Area                 | Spring-fed marsh/meadow                  | 51,17100143 | -115,5879974 |              |
| 08BBLEP-04499    | 611 | JX008272  | Geometridae | Larentinae   | Xanthorhoe alticolata   | Barnes & McDunnough | J.Straka,J.Cossey                                             | 31-Jul-2008 | Canada        | Alberta          | Banff                                | Banff Nat. Park - Cave and Basin Area                 | Spring-fed marsh/meadow                  | 51,17100143 | -115,5879974 |              |
| 08BBLEP-04507    | 658 | JX008247  | Geometridae | Larentinae   | Xanthorhoe alticolata   | Barnes & McDunnough | J.Straka,J.Cossey                                             | 31-Jul-2008 | Canada        | Alberta          | Banff                                | Banff Nat. Park - Cave and Basin Area                 | Spring-fed marsh/meadow                  | 51,17100143 | -115,5879974 |              |
| 08BBLEP-04510    | 637 | JX008129  | Geometridae | Larentinae   | Xanthorhoe alticolata   | Barnes & McDunnough | J.Straka,J.Cossey                                             | 31-Jul-2008 | Canada        | Alberta          | Banff                                | Banff Nat. Park - Cave and Basin Area                 | Spring-fed marsh/meadow                  | 51,17100143 | -115,5879974 |              |
| 08BBLEP-04513    | 658 | JX008281  | Geometridae | Larentinae   | Xanthorhoe alticolata   | Barnes & McDunnough | J.Straka,J.Cossey                                             | 31-Jul-2008 | Canada        | Alberta          | Banff                                | Banff Nat. Park - Cave and Basin Area                 | Spring-fed marsh/meadow                  | 51,17100143 | -115,5879974 |              |
| 08BBLEP-04518    | 658 | JX008202  | Geometridae | Larentinae   | Xanthorhoe alticolata   | Barnes & McDunnough | J.Straka,J.Cossey                                             | 31-Jul-2008 | Canada        | Alberta          | Banff                                | Banff Nat. Park - Cave and Basin Area                 | Spring-fed marsh/meadow                  | 51,17100143 | -115,5879974 |              |
| 08BBLEP-04532    | 658 | JX008115  | Geometridae | Larentinae   | Xanthorhoe alticolata   | Barnes & McDunnough | J.Straka,J.Cossey                                             | 31-Jul-2008 | Canada        | Alberta          | Banff                                | Banff Nat. Park - Cave and Basin Area                 | Spring-fed marsh/meadow                  | 51,17100143 | -115,5879974 |              |
| 08BBLEP-04896    | 658 | JX008386  | Geometridae | Larentinae   | Xanthorhoe alticolata   | Barnes & McDunnough |                                                               | 06-Aug-2008 | Canada        | Alberta          | Waterton                             | Waterton Lakes Nat. Park - Blakiston Creel            | Rocky creekside                          | 49,07799911 | -113,8820038 |              |
| 10BBCLP-095f     | 658 | JF841966  | Geometridae | Larentinae   | Xanthorhoe alticolat:   | Barnes & McDunnough | BiObus 201C                                                   | 20-Jul-2011 | Canada        | British Columbia | Yoho NF                              |                                                       | Forested cmpgrd                          | 51,4239997E | -116,429000E |              |
| 10BBCLP-095f     | 658 | JF841967  | Geometridae | Larentinae   | Xanthorhoe alticolat:   | Barnes & McDunnough | BiObus 201C                                                   | 23-Jul-2011 | Canada        | British Columbia | Yoho NF                              |                                                       | Side of gravel road                      | 51,4489986E | -116,323997E |              |
| BC ZSM Lep 4926f | 658 | JN274133  | Geometridae | Larentinae   | Xanthorhoe annotinata:  | Zetterstedt         | L. Weigert                                                    | 01-Jul-2008 | Sweden        |                  | Torne Lappmar                        |                                                       | 8 km NE Jukkasjaer                       | 67,8889007E | 20,7563991E  |              |
| MM00603          | 611 | HM871086  | Geometridae | Larentinae   | Xanthorhoe annotinata   | Zetterstedt         | Marko Mutanen                                                 | 08-Jun-2006 | Finland       |                  | Ostrobottnia borealis pars australis |                                                       | Kiminki                                  | 65,07099915 | 25,2500038   |              |
| MM04112          | 658 | HM38690E  | Geometridae | Larentinae   | Xanthorhoe annotinata:  | Zetterstedt         | Marko Mutanen                                                 |             | Finland       |                  | Karelia borealis                     |                                                       | Enontekio                                | 68,9970016E | 20,7439994E  |              |
| MM1403E          | 658 | HM87585E  | Geometridae | Larentinae   | Xanthorhoe annotinata:  | Zetterstedt         | Marko Mutanen                                                 |             | Finland       |                  |                                      |                                                       | Tuupovaara                               | 62,375E     | 30,9050006E  |              |
| 10BBCLP-106E     | 658 | JF842073  | Geometridae | Larentinae   | Xanthorhoe baffinensii: | McDunnough          | Jugr                                                          | 25-Jun-2010 | Canada        | Alberta          | Jasper NP                            |                                                       | Slough                                   | 52,8919982E | -118,0910034 |              |
| 10BBCLP-106E     | 658 | JF842075  | Geometridae | Larentinae   | Xanthorhoe baffinensii: | McDunnough          | BiObus 201C                                                   | 23-Jul-2011 | Canada        | British Columbia | Yoho NF                              |                                                       | Forested river in river basir            | 51,5E       | -116,472999E |              |
| CNCLPE0003415f   | 658 | JX008211  | Geometridae | Larentinae   | Xanthorhoe baffinensii: | McDunnough          | H. Hense                                                      | 20-Jul-199E | United States | Nevada           | vic. Arvati                          |                                                       |                                          |             |              |              |
| CNCLPE0003416f   | 658 | JX008267  | Geometridae | Larentinae   | Xanthorhoe baffinensii: | McDunnough          | H. Hense                                                      | 18-Jul-199E | United States | Nevada           | vic. Arvati                          |                                                       |                                          |             |              |              |
| 06-PROBE-2653    | 651 | JX008196  | Geometridae | Larentinae   | Xanthorhoe decoloraria  | Esper               | P.D.N. Hebert                                                 | 14-Aug-2006 | Canada        | Manitoba         | Churchill                            | 22 km ESE Churchill, vicinity of CNSC, Twin Lakes Roa |                                          | 58,72499847 | -93,84100342 |              |
| 07PROBE-0055f    | 658 | JX008123  | Geometridae | Larentinae   | Xanthorhoe decoloraris  | Esper               | J.deWaard                                                     | 13-Jul-2007 | Canada        | Manitoba         | Churchill                            | Town of Churchill                                     | Aurora Inn                               | 58,77099991 | -94,1740003E |              |
| 07PROBE-0379f    | 658 | JX008497  | Geometridae | Larentinae   | Xanthorhoe decoloraris  | Esper               | J.McGowar                                                     | 17-Jul-2007 | Canada        | Manitoba         | Churchill                            | Town of Churchill                                     | Apartment in town                        | 58,7700004E | -94,168997E  |              |
| 07PROBE-0384f    | 657 | JX008188  | Geometridae | Larentinae   | Xanthorhoe decoloraris  | Esper               | J.deWaard                                                     | 17-Jul-2007 | Canada        | Manitoba         | Churchill                            | 26 km SE Churchill, Twin Lake                         | Clearing near                            | 58,6180000E | -93,8099975E |              |
| 07PROBE-1002f    | 658 | JX008175  | Geometridae | Larentinae   | Xanthorhoe decoloraris  | Esper               | P.D.N. Heber                                                  | 18-Aug-2007 | Canada        | Manitoba         | Churchill                            | Town of Churchill                                     |                                          | 58,76900101 | -94,17199707 |              |
| 07PROBE-10168    | 658 | JX008453  | Geometridae | Larentinae   | Xanthorhoe decoloraria  | Esper               | P.D.N. Hebert                                                 | 19-Jul-2007 | Canada        | Manitoba         | Churchill                            | 26 km SE Churchill, Twin Lakes fen                    |                                          | 58,63199997 | -93,78800201 |              |
| 07PROBE-10169    | 658 | JX008496  | Geometridae | Larentinae   | Xanthorhoe decoloraria  | Esper               | P.D.N. Hebert                                                 | 19-Jul-2007 | Canada        | Manitoba         | Churchill                            | 26 km SE Churchill, Twin Lakes fen                    |                                          | 58,63199997 | -93,78800201 |              |
| 07PROBE-1023f    | 645 | JX008235  | Geometridae | Larentinae   | Xanthorhoe decoloraris  | Esper               | P.D.N. Heber                                                  | 21-Jul-2007 | Canada        | Manitoba         | Churchill                            | Town of Churchill                                     | (general coordinate)                     | 58,76900101 | -94,17199707 |              |
| 07PROBE-1032f    | 658 | JX008425  | Geometridae | Larentinae   | Xanthorhoe decoloraris  | Esper               | P.D.N. Heber                                                  | 22-Jul-2007 | Canada        | Manitoba         | Churchill                            | unspecified locality                                  | (general coordinate)                     | 58,7400016E | -93,8199996E |              |
| 07PROBE-1032f    | 658 | JX008413  | Geometridae | Larentinae   | Xanthorhoe decoloraris  | Esper               | P.D.N. Heber                                                  | 22-Jul-2007 | Canada        | Manitoba         | Churchill                            | unspecified locality                                  | (general coordinate)                     | 58,7400016E | -93,8199996E |              |
| 07PROBE-1032f    | 658 | JX008439  | Geometridae | Larentinae   | Xanthorhoe decoloraris  | Esper               | P.D.N. Heber                                                  | 22-Jul-2007 | Canada        | Manitoba         | Churchill                            | unspecified locality                                  | (general coordinate)                     | 58,7400016E | -93,8199996E |              |
| 07PROBE-1032f    | 658 | JX008132  | Geometridae | Larentinae   | Xanthorhoe decoloraris  | Esper               | P.D.N. Heber                                                  | 22-Jul-2007 | Canada        | Manitoba         | Churchill                            | unspecified locality                                  | (general coordinate)                     | 58,7400016E | -93,8199996E |              |
| 07PROBE-1040f    | 658 | JX008245  | Geometridae | Larentinae   | Xanthorhoe decoloraris  | Esper               | P.D.N. Heber                                                  | 22-Jul-2007 | Canada        | Manitoba         | Churchill                            | 10 km E Churchill, Launch Roa                         |                                          | 58,7599983E | -94          |              |
| 07PROBE-1040f    | 658 | JX008204  | Geometridae | Larentinae   | Xanthorhoe decoloraris  | Esper               | P.D.N. Heber                                                  | 22-Jul-2007 | Canada        | Manitoba         | Churchill                            | 10 km E Churchill, Launch Roa                         |                                          | 58,7599983E | -94          |              |
| 07PROBE-1040f    | 657 | JX008121  | Geometridae | Larentinae   | Xanthorhoe decoloraris  | Esper               | P.D.N. Heber                                                  | 22-Jul-2007 | Canada        | Manitoba         | Churchill                            | 10 km E Churchill, Launch Roa                         |                                          | 58,7599983E | -94          |              |
| 07PROBE-10443    | 650 | JX008411  | Geometridae | Larentinae   | Xanthorhoe decoloraria  | Esper               | P.D.N. Hebert                                                 | 25-Jul-2007 | Canada        | Manitoba         | Churchill                            | 2 km NW Churchill, Churchill Harbour                  |                                          | 58,78099823 | -94,1969986  |              |
| 07PROBE-1063f    | 658 | JX008367  | Geometridae | Larentinae   | Xanthorhoe decoloraris  | Esper               | P.D.N. Heber                                                  | 20-Jul-2007 | Canada        | Manitoba         | Churchill                            | unspecified locality                                  | (general coordinate)                     | 58,7400016E | -93,8199996E |              |
| 07PROBE-1063f    | 658 | JX008414  | Geometridae | Larentinae   | Xanthorhoe decoloraris  | Esper               | P.D.N. Heber                                                  | 20-Jul-2007 | Canada        | Manitoba         | Churchill                            | unspecified locality                                  | (general coordinate)                     | 58,7400016E | -93,8199996E |              |
| 07PROBE-1069f    | 658 | JX008424  | Geometridae | Larentinae   | Xanthorhoe decoloraris  | Esper               | P.D.N. Heber                                                  | 23-Jul-2007 | Canada        | Manitoba         | Churchill                            | unspecified locality                                  | (general coordinate)                     | 58,7400016E | -93,8199996E |              |
| 07PROBE-1091f    | 658 | JX008302  | Geometridae | Larentinae   | Xanthorhoe decoloraris  | Esper               | P.D.N. Heber                                                  | 23-Jul-2007 | Canada        | Manitoba         | Churchill                            | unspecified locality                                  | (general coordinate)                     | 58,7400016E | -93,8199996E |              |
| 07PROBE-1091f    | 658 | JX008350  | Geometridae | Larentinae   | Xanthorhoe decoloraris  | Esper               | P.D.N. Heber                                                  | 23-Jul-2007 | Canada        | Manitoba         | Churchill                            | unspecified locality                                  | (general coordinate)                     | 58,7400016E | -93,8199996E |              |
| 07PROBE-1091f    | 658 | JX008206  | Geometridae | Larentinae   | Xanthorhoe decoloraris  | Esper               | P.D.N. Heber                                                  | 23-Jul-2007 | Canada        | Manitoba         | Churchill                            | unspecified locality                                  | (general coordinate)                     | 58,7400016E | -93,8199996E |              |
| 07WNP-10382      | 658 | JX008192  | Geometridae | Larentinae   | Xanthorhoe decoloraris  | Esper               | J.McGowar                                                     | 04-Aug-2007 | Canada        | Manitoba         | Churchill                            | 111 Heame St., backyard                               |                                          | 58,76900101 | -94,1579971E |              |
| 07WNP-10391      | 658 | JX008178  | Geometridae | Larentinae   | Xanthorhoe decoloraris  | Esper               | J.McGowar                                                     | 04-Aug-2007 | Canada        | Manitoba         | Churchill                            | 111 Heame St., backyard                               |                                          | 58,76900101 | -94,1579971E |              |
| 07WNP-10750      | 658 | JX008264  | Geometridae | Larentinae   | Xanthorhoe decoloraris  | Esper               | J.McGowar                                                     | 11-Aug-2007 | Canada        | Manitoba         | Churchill                            | Town of Churchill                                     | 111 Heame St., backyard                  |             | 58,76900101  | -94,1579971E |
| 07WNP-10751      | 658 | JX008374  | Geometridae | Larentinae   | Xanthorhoe decoloraris  | Esper               | J.McGowar                                                     | 11-Aug-2007 | Canada        | Manitoba         | Churchill                            | Town of Churchill                                     | 111 Heame St., backyard                  |             | 58,76900101  | -94,1579971E |
| 08BBLEP-04501    | 584 | JX008286  | Geometridae | Larentinae   | Xanthorhoe decoloraria  | Esper               | J.Straka,J.Cossey                                             | 31-Jul-2008 | Canada        | Alberta          | Banff                                | Banff Nat. Park - Cave and Basin Area                 | Spring-fed marsh/meadow                  | 51,17100143 | -115,5879974 |              |
| 08BBLEP-04504    | 613 | JX008149  | Geometridae | Larentinae   | Xanthorhoe decoloraria  | Esper               | J.Straka,J.Cossey                                             | 31-Jul-2008 | Canada        | Alberta          | Banff                                | Banff Nat. Park - Cave and Basin Area                 | Spring-fed marsh/meadow                  | 51,17100143 | -115,5879974 |              |
| 08BBLEP-04505    | 658 | JX008478  | Geometridae | Larentinae   | Xanthorhoe decoloraria  | Esper               | J.Straka,J.Cossey                                             | 31-Jul-2008 | Canada        | Alberta          | Banff                                | Banff Nat. Park - Cave and Basin Area                 | Spring-fed marsh/meadow                  | 51,17100143 | -115,5879974 |              |

|                  |     |           |             |            |                        |             |                                                 |             |               |                  |                                      |                                                    |                                             |             |              |
|------------------|-----|-----------|-------------|------------|------------------------|-------------|-------------------------------------------------|-------------|---------------|------------------|--------------------------------------|----------------------------------------------------|---------------------------------------------|-------------|--------------|
| 08BBLEP-04572    | 658 | JX008306  | Geometridae | Larentinae | Xanthorhoe decoloraria | Esper       | J.Straka,J.Cossey                               | 01-Aug-2008 | Canada        | Alberta          | Banff                                | Banff Nat. Park - Vermillion Lakes                 | Aspen/conifer stand, marsh border           | 51,17599869 | -115,6350021 |
| 08BBLEP-04607    | 658 | JX008470  | Geometridae | Larentinae | Xanthorhoe decoloraria | Esper       | J.Straka,J.Cossey                               | 01-Aug-2008 | Canada        | Alberta          | Banff                                | Banff Nat. Park - Vermillion Lakes                 | Aspen/conifer stand, marsh border           | 51,17599869 | -115,6350021 |
| 10BBCLP-095f     | 658 | JF841963  | Geometridae | Larentinae | Xanthorhoe decoloraria | Esper       | BiObus 201C                                     | 10-Aug-2010 | Canada        | Alberta          | Elk Island NF                        | Beaver Pond Trl                                    | Aspen forest: sedge meadow                  | 53,68700022 | -112,8130035 |
| 10BBCLP-096f     | 658 | JF841973  | Geometridae | Larentinae | Xanthorhoe decoloraria | Esper       | BiObus 201C                                     | 02-Aug-2010 | Canada        | Alberta          | Jasper NP                            | Whistlers Campground                               | Pine forest                                 | 52,8429986  | -118,0719986 |
| 10BBCLP-096f     | 658 | JF841979  | Geometridae | Larentinae | Xanthorhoe decoloraria | Esper       | BiObus 201C                                     | 03-Aug-2010 | Canada        | Alberta          | Jasper NP                            | Five Lakes Valley Tr                               | Mixed forest                                | 52,8079986  | -118,023002E |
| 10BBCLP-117f     | 658 | JF842189  | Geometridae | Larentinae | Xanthorhoe decoloraria | Esper       | BiObus 201C                                     | 09-Aug-2010 | Canada        | Alberta          | Elk Island NF                        | Tawayik Lake Picnic Area                           | Meadow: aspen forest                        | 53,61800000 | -112,875     |
| 10-JDWBC-0180    | 658 | HM86350f  | Geometridae | Larentinae | Xanthorhoe decoloraria | Esper       | deWaard, J.R.                                   | 12-Jul-2006 | Canada        | British Columbia | nr. Hazelton                         | Date Creek Silvicultural System                    | A4-T                                        | 55,4650001E | -127,805999E |
| 10-JDWBC-0886    | 658 | HM87032f  | Geometridae | Larentinae | Xanthorhoe decoloraria | Esper       | deWaard, J.R.                                   | 12-Jul-2006 | Canada        | British Columbia | nr. Hazelton                         | Date Creek Silvicultural System                    | B2-T                                        | 55,4589996E | -127,811996E |
| 10-JDWBC-2400    | 658 | HM86416f  | Geometridae | Larentinae | Xanthorhoe decoloraria | Esper       | deWaard, J.R.                                   | 12-Jul-2006 | Canada        | British Columbia | nr. Hazelton                         | Date Cr. Silvicultural System                      | A3-T                                        | 55,4640007  | -127,805997E |
| BC NP 020f       | 407 | JX034673  | Geometridae | Larentinae | Xanthorhoe decoloraria | Esper       | N. Podl                                         | 09-Aug-2006 | Austria       | Stieismark       | Totes Gebirge                        | Forstingherhuettel                                 | Colle di Lombard                            | 47,68700022 | 13,9670001E  |
| BC ZSM Lep 3436f | 658 | HQ95762f  | Geometridae | Larentinae | Xanthorhoe decoloraria | Esper       | P. Skou                                         | 25-Jul-2006 | Italy         | Piedmont         |                                      |                                                    | Colle di Lombard                            | 44,1991996E | 7,14900016E  |
| BC ZSM Lep 3492f | 658 | HM91435f  | Geometridae | Larentinae | Xanthorhoe decoloraria | Esper       | B. Schacht                                      | 22-Jul-2006 | Russia        |                  | Altai                                | env. Aktasf                                        |                                             | 50,3115997f | 87,6145019E  |
| MM02857          | 658 | HM871730  | Geometridae | Larentinae | Xanthorhoe decoloraria | Esper       | Marko Mutanen                                   | 29-Jun-2007 | Finland       |                  | Ostrobothnia borealis pars australis |                                                    | Kiminki                                     | 65,07099915 | 25,72500038  |
| MM0410f          | 658 | HM39689f  | Geometridae | Larentinae | Xanthorhoe decoloraria | Esper       | Marko Mutanen                                   | 29-Jun-2007 | Finland       |                  | Lapponia inarenis                    |                                                    | Enontekiö                                   | 68,9970016f | 20,7439994f  |
| MM0636f          | 658 | HQ370327  | Geometridae | Larentinae | Xanthorhoe decoloraria | Esper       | Marko Mutanen, Anttoni Mutanen, Nestori Mutanen | 29-Jun-2007 | Finland       |                  |                                      |                                                    | Utsjoki                                     | 69,37599945 | 25,80500031  |
| TLMF Lep 00377   | 658 | HM425865  | Geometridae | Larentinae | Xanthorhoe decoloraria | Esper       | Huemer P.                                       | 31-Jul-2009 | Austria       | Karnten          |                                      |                                                    | Malnitz, Doesental, Arthur-v.-Schmid-Haus W | 46,98939896 | 13,26699006  |
| TLMF Lep 00474   | 658 | HM425949  | Geometridae | Larentinae | Xanthorhoe decoloraria | Esper       | Huemer P.                                       | 27-Jul-2009 | Italy         | Cuneo            |                                      |                                                    | Colle Valcavera NE/ Demonte NW              | 44,38439941 | 7,10638999   |
| TLMF Lep 0072f   | 658 | HM42608f  | Geometridae | Larentinae | Xanthorhoe decoloraria | Esper       | Tarmann G. M                                    | 22-Jul-2006 | Italy         |                  | Belluno                              |                                                    | Passo di Valparola W, Fort SV               | 46,52669907 | 11,992199E   |
| CNCLPE0003406f   | 307 | JX008481  | Geometridae | Larentinae | Xanthorhoe incurSAT    | Hübner      | G. P. Hollan                                    | 02-Jul-1948 | Canada        | British Columbia | nr. Revelstok                        |                                                    |                                             |             |              |
| CNCLPE0003406f   | 307 | JX008336  | Geometridae | Larentinae | Xanthorhoe incurSAT    | Hübner      | G. P. Hollan                                    | 08-Jul-1948 | Canada        | British Columbia | Eva Lake trail                       |                                                    |                                             |             |              |
| TLMF Lep 01144   | 658 | HQ968504  | Geometridae | Larentinae | Xanthorhoe incurSAT    | Hübner      | Aistleitner U.                                  | 13-Jun-2009 | Switzerland   | Graubunden       |                                      |                                                    | Tiefencastel S/ Salout, Got Grond           | 46,65000153 | 9,597000122  |
| TLMF Lep 01145   | 658 | HQ968505  | Geometridae | Larentinae | Xanthorhoe incurSAT    | Hübner      | Aistleitner U.                                  | 13-Jun-2009 | Switzerland   | Graubunden       |                                      |                                                    | Tiefencastel S/ Salout, Got Grond           | 46,65000153 | 9,597000122  |
| TLMF Lep 0255f   | 658 | JF960091  | Geometridae | Larentinae | Xanthorhoe incurSAT    | Hübner      | Huemer P                                        | 09-Jun-2010 | Italy         | South Tyro       |                                      |                                                    | Ritten/ Obergruenwal                        | 46,5970001f | 11,4390001f  |
| MM08067          | 658 | HM873764  | Noctuidae   | Noctuidae  | Xestia alpicola        | Zetterstedt | Marko Mutanen, Panu Vaelimaeki                  | 09-Jun-2010 | Finland       |                  |                                      | Lapponia kemensis pars occidentalis                | Kolari                                      | 67,27600098 | 23,75300026  |
| MM08068          | 658 | HM873765  | Noctuidae   | Noctuidae  | Xestia alpicola        | Zetterstedt | Marko Mutanen, Panu Vaelimaeki                  | 09-Jun-2010 | Finland       |                  |                                      | Lapponia kemensis pars occidentalis                | Kolari                                      | 67,27600098 | 23,75300026  |
| MM1210f          | 658 | HM87519f  | Noctuidae   | Noctuidae  | Xestia alpicola        | Zetterstedt | Marko Mutanen, Panu Vaelimaeki                  | 09-Jun-2010 | Finland       |                  |                                      | Nylandina                                          | Hank                                        | 59,83599854 | 23,2360000E  |
| MM1874f          | 658 | JF854600  | Noctuidae   | Noctuidae  | Xestia alpicola        | Zetterstedt | Reima Leinonen                                  | 29-Jun-2010 | Finland       |                  |                                      | Ostrobothnia kajaniensis                           | Enontekiö                                   | 64,6600039E | 28,0470008E  |
| TLMF Lep 00366   | 658 | HM425856  | Noctuidae   | Noctuidae  | Xestia alpicola        | Zetterstedt | Huemer P.                                       | 01-Aug-2009 | Austria       | Karnten          |                                      | Malnitz, Doesental, Arthur-v.-Schmid-Haus W        | 46,98939896                                 | 13,26699006 |              |
| TLMF Lep 0072f   | 658 | HM42608f  | Noctuidae   | Noctuidae  | Xestia alpicola        | Zetterstedt | Tarmann G. M                                    | 22-Jul-2006 | Italy         |                  | Belluno                              |                                                    | Passo di Valparola W, Fort SV               | 46,52669907 | 11,992199E   |
| TLMF Lep 0072f   | 658 | HM42608f  | Noctuidae   | Noctuidae  | Xestia alpicola        | Zetterstedt | Tarmann G. M                                    | 22-Jul-2006 | Italy         |                  | Belluno                              |                                                    | Passo di Valparola W, Fort SV               | 46,52669907 | 11,992199E   |
| TLMF Lep 0276f   | 658 | JF860284  | Noctuidae   | Noctuidae  | Xestia alpicola        | Zetterstedt | Schmid J.                                       | 19-Jul-2007 | Switzerland   | Graubunden       |                                      |                                                    | NW Abhang Horn/ Val                         | 46,61000061 | 9,19499969E  |
| TLMF Lep 02898   | 658 | JF860349  | Noctuidae   | Noctuidae  | Xestia alpicola        | Zetterstedt | Huemer P.                                       | 31-Jul-2009 | Austria       | Karnten          |                                      |                                                    | Malnitz, Doesental, Arthur-v.-Schmid-Haus W | 46,98998941 | 13,26700002  |
| MM06114          | 560 | HM87304f  | Noctuidae   | Noctuidae  | Xestia fennica         | Brandt      | Panu Vaelimaeki                                 | 09-Jun-2010 | Finland       |                  |                                      | Regio kuusamoensis                                 | Kuusam                                      | 66,2229995f | 29,4220008E  |
| MM1866f          | 428 | JX034622  | Noctuidae   | Noctuidae  | Xestia fennica         | Brandt      | Panu Vaelimaeki, Petri Hirvonen                 | 09-Jun-2010 | Finland       |                  |                                      | Lapponia kemensis pars occidentalis                | Muonio                                      | 68,01000214 | 24,12899971  |
| CNC LEP0005280f  | 657 | JX008472  | Noctuidae   | Noctuidae  | Xestia lorez           | Staudinger  | T. Kva                                          | 18-Jul-1988 | United States | Alaska           |                                      | Hazhoro Pass, near Palme                           |                                             |             |              |
| CNC LEP0005280f  | 642 | JX008404  | Noctuidae   | Noctuidae  | Xestia lorez           | Staudinger  | Petri Hirvonen                                  | 29-Jul-1975 | Finland       | Yukon Territory  |                                      | km 84 of Dempster Hwy                              |                                             |             |              |
| MM05675          | 658 | HQ257031E | Noctuidae   | Noctuidae  | Xestia lorez           | Staudinger  | Marko Mutanen                                   | 01-Jul-2007 | Finland       |                  |                                      | Lapponia enontekiensis                             | Enontekiö                                   | 68,9970016E | 20,7439994E  |
| MM1589E          | 658 | HQ257042E | Noctuidae   | Noctuidae  | Xestia lorez           | Staudinger  | Marko Mutanen                                   | 01-Jul-2007 | Finland       |                  |                                      | Lapponia enontekiensis                             | Enontekiö                                   | 68,9970016E | 20,7439994E  |
| MM15897          | 658 | HQ257042E | Noctuidae   | Noctuidae  | Xestia lorez           | Staudinger  | Marko Mutanen                                   | 01-Jul-2007 | Finland       |                  |                                      | Lapponia enontekiensis                             | Enontekiö                                   | 68,9970016E | 20,7439994E  |
| NOC1414f         | 658 | JX008346  | Noctuidae   | Noctuidae  | Xestia lorez           | Staudinger  | Wood & Lafontaine                               | 20-Jul-1981 | Austria       | Yukon Territory  |                                      | Km. 82 Dempster Hwy                                |                                             |             |              |
| TLMF Lep 0074f   | 658 | HM42610f  | Noctuidae   | Noctuidae  | Xestia lorez           | Staudinger  | Wieser C.                                       | 15-Jul-2006 | Austria       | Karnten          |                                      |                                                    | Kleiner Trieb E                             | 47          | 13,0666999E  |
| TLMF Lep 0016f   | 331 | JX034590  | Noctuidae   | Noctuidae  | Xestia rhaetica        | Staudinger  | Huemer P. & Erlebach S                          | 25-Aug-2005 | Austria       | Salzburg         |                                      | Wildgerlostal, S Trisslalm- Krimm                  |                                             | 47,1899998E | 12,1129999E  |
| TLMF Lep 0016f   | 331 | JX034680  | Noctuidae   | Noctuidae  | Xestia rhaetica        | Staudinger  | Huemer P. & Erlebach S                          | 25-Aug-2005 | Austria       | Salzburg         |                                      | Wildgerlostal, S Trisslalm- Krimm                  |                                             | 47,1899998E | 12,1129999E  |
| TLMF Lep 00174   | 331 | JX034682  | Noctuidae   | Noctuidae  | Xestia rhaetica        | Staudinger  | Huemer P.                                       | 23-Jul-2007 | Italy         | South Tyrol      |                                      | Schiern, Touristensteig, Latschenfelder- Kastelrut |                                             | 46,51200104 | 11,5909996   |
| TLMF Lep 00175   | 331 | JX034585  | Noctuidae   | Noctuidae  | Xestia rhaetica        | Staudinger  | Huemer P.                                       | 23-Jul-2007 | Italy         | South Tyrol      |                                      | Schiern, Touristensteig, Latschenfelder- Kastelrut |                                             | 46,51200104 | 11,5909996   |
| 07PROBE-10458    | 658 | JX008199  | Noctuidae   | Noctuidae  | Xestia speciosa        | Hübner      | P.D.N. Hebert                                   | 25-Jul-2007 | Canada        | Manitoba         | Churchill                            | Churchill                                          | Harbour                                     | 58,78099823 | -94,1969986  |
| 07PROBE-1062f    | 658 | JX008433  | Noctuidae   | Noctuidae  | Xestia speciosa        | Hübner      | P.D.N. Heber                                    | 20-Jul-2007 | Canada        | Manitoba         | Churchill                            | Churchill                                          | unspecified locality                        | 58,7400016E | -93,8199996E |
| 07WNP-10367      | 657 | JX008128  | Noctuidae   | Noctuidae  | Xestia speciosa        | Hübner      | J.McGowar                                       | 04-Aug-2007 | Canada        | Manitoba         | Churchill                            | Town of Churchill                                  | (general coordinates)                       | 58,76900101 | -94,1579971E |
| 07WNP-10592      | 658 | JX008482  | Noctuidae   | Noctuidae  | Xestia speciosa        | Hübner      | J.McGowar                                       | 10-Aug-2007 | Canada        | Manitoba         | Churchill                            | Town of Churchill                                  | Cemetery                                    | 58,76900101 | -94,1559982E |
| 07WNP-10593      | 658 | JX008468  | Noctuidae   | Noctuidae  | Xestia speciosa        | Hübner      | J.McGowar                                       | 10-Aug-2007 | Canada        | Manitoba         | Churchill                            | Town of Churchill                                  | Cemetery                                    | 58,76900101 | -94,1559982E |
| 08BBLEP-04416    | 658 | JX008369  | Noctuidae   | Noctuidae  | Xestia speciosa        | Hübner      | J.Straka                                        | 02-Aug-2008 | Canada        | Alberta          | Banff                                | Banff Nat. Park - Tunnel Mountain Campground       | Pine forest near aspen stand                | 51,19300079 | -115,533996E |
| 08BBLEP-04498    | 658 | JX008212  | Noctuidae   | Noctuidae  | Xestia speciosa        | Hübner      | J.Straka,J.Cossey                               | 31-Jul-2008 | Canada        | Alberta          | Banff                                | Banff Nat. Park - Cave and Basin Area              | Spring-fed marsh/meadow                     | 51,17100143 | -115,5879974 |
| 08BBLEP-04611    | 658 | JX008151  | Noctuidae   | Noctuidae  | Xestia speciosa        | Hübner      | J.Straka,J.Cossey                               | 01-Aug-2008 | Canada        | Alberta          | Banff                                | Banff Nat. Park - Vermillion Lakes                 | Aspen/conifer stand, marsh border           | 51,17599869 | -115,6350021 |
| 08-JDWBC-0733    | 658 | JX008228  | Noctuidae   | Noctuidae  | Xestia speciosa        | Hübner      | deWaard, J.R.                                   | 07-Aug-2006 | Canada        | British Columbia | nr. Houston                          | 138T                                               | MOFR MPB sit                                | 54,6660003f | -126,3570022 |
| 08-JDWBC-0736    | 658 | JX008267  | Noctuidae   | Noctuidae  | Xestia speciosa        | Hübner      | deWaard, J.R.                                   | 07-Aug-2006 | Canada        | British Columbia | nr. Houston                          | 138T                                               | MOFR MPB sit                                | 54,6660003f | -126,3570022 |
| 08-JDWBC-0761    | 658 | JX008203  | Noctuidae   | Noctuidae  | Xestia speciosa        | Hübner      | deWaard, J.R.                                   | 07-Aug-2006 | Canada        | British Columbia | nr. Houston                          | 138T                                               | MOFR MPB sit                                | 54,6660003f | -126,3570022 |
| 08-JDWBC-0953    | 658 | JX008125  | Noctuidae   | Noctuidae  | Xestia speciosa        | Hübner      | deWaard, J.R.                                   | 07-Aug-2006 | Canada        | British Columbia | nr. Houston                          | 280T                                               | MOFR MPB sit                                | 54,6329994f | -126,424003E |
| 08-JDWBC-0954    | 658 | JX008375  | Noctuidae   | Noctuidae  | Xestia speciosa        | Hübner      | deWaard, J.R.                                   | 07-Aug-2006 | Canada        | British Columbia | nr. Houston                          | 280T                                               | MOFR MPB sit                                | 54,6329994f | -126,424003E |
| 08-JDWBC-0960    | 658 | JX008328  | Noctuidae   | Noctuidae  | Xestia speciosa        | Hübner      | deWaard, J.R.                                   | 07-Aug-2006 | Canada        | British Columbia | nr. Houston                          | 280T                                               | MOFR MPB sit                                | 54,6329994f | -126,424003E |
| 08-JDWBC-0965    | 658 | JX008142  | Noctuidae   | Noctuidae  | Xestia speciosa        | Hübner      | deWaard, J.R.                                   | 07-Aug-2006 | Canada        | British Columbia | nr. Houston                          | 280T                                               | MOFR MPB sit                                | 54,6329994f | -126,424003E |
| 08-JDWBC-0966    | 658 | JX008220  | Noctuidae   | Noctuidae  | Xestia speciosa        | Hübner      | deWaard, J.R.                                   | 07-Aug-2006 | Canada        | British Columbia | nr. Houston                          | 280T                                               | MOFR MPB sit                                | 54,6329994f | -126,424003E |
| 08-JDWBC-0968    | 658 | JX008490  | Noctuidae   | Noctuidae  | Xestia speciosa        | Hübner      | deWaard, J.R.                                   | 07-Aug-2006 | Canada        | British Columbia | nr. Houston                          | 280T                                               | MOFR MPB sit                                | 54,6329994f | -126,424003E |
| 08-JDWBC-0969    | 658 | JX008447  | Noctuidae   | Noctuidae  | Xestia speciosa        | Hübner      | deWaard, J.R.                                   | 07-Aug-2006 | Canada        | British Columbia | nr. Houston                          | 280T                                               | MOFR MPB sit                                | 54,6329994f | -126,424003E |
| 08-JDWBC-0986    | 658 | JX008282  | Noctuidae   | Noctuidae  | Xestia speciosa        | Hübner      | deWaard, J.R.                                   | 07-Aug-2006 | Canada        | British Columbia | nr. Houston                          | 280T                                               | MOFR MPB sit                                | 54,6329994f | -126,424003E |
| 08-JDWBC-0997    | 658 | JX008450  | Noctuidae   | Noctuidae  | Xestia speciosa        | Hübner      | deWaard, J.R.                                   | 07-Aug-2006 | Canada        | British Columbia | nr. Houston                          | 280T                                               | MOFR MPB sit                                | 54,6329994f | -126,424003E |
| 08-JDWBC-0999    | 658 | JX008415  | Noctuidae   | Noctuidae  | Xestia speciosa        | Hübner      | deWaard, J.R.                                   | 07-Aug-2006 | Canada        | British Columbia | nr. Houston                          | 280T                                               | MOFR MPB sit                                | 54,6329994f | -126,424003E |
| 08-JDWBC-1001    | 658 | JX008111  | Noctuidae   | Noctuidae  | Xestia speciosa        | Hübner      | deWaard, J.R.                                   | 07-Aug-2006 | Canada        | British Columbia | nr. Houston                          | 280T                                               | MOFR MPB sit                                | 54,6329994f | -126,424003E |
| 08-JDWBC-1002    | 658 | JX008315  | Noctuidae   | Noctuidae  | Xestia speciosa        | Hübner      | deWaard, J.R.                                   | 07-Aug-2006 | Canada        | British Columbia | nr. Houston                          | 280T                                               | MOFR MPB sit                                | 54,6329994f | -126,424003E |
| 08-JDWBC-1015    | 658 |           |             |            |                        |             |                                                 |             |               |                  |                                      |                                                    |                                             |             |              |

|                  |     |          |            |            |                 |            |                                |             |         |                  |                                      |                                  |                                  |             |              |             |
|------------------|-----|----------|------------|------------|-----------------|------------|--------------------------------|-------------|---------|------------------|--------------------------------------|----------------------------------|----------------------------------|-------------|--------------|-------------|
| 08-JDWBC-1857    | 658 | JX008324 | Noctuidae  | Noctuidae  | Xestia speciosa | Hübner     | deWaard, J.R.                  | 07-Aug-2006 | Canada  | British Columbia | nr. Houston                          | MOFR MPB sitr                    | 93T                              | 54,6170005E | -126,4110031 |             |
| 08-JDWBC-1863    | 658 | JX008273 | Noctuidae  | Noctuidae  | Xestia speciosa | Hübner     | deWaard, J.R.                  | 07-Aug-2006 | Canada  | British Columbia | nr. Houston                          | MOFR MPB sitr                    | 93T                              | 54,6170005E | -126,4110031 |             |
| 08-JDWBC-1867    | 658 | JX008339 | Noctuidae  | Noctuidae  | Xestia speciosa | Hübner     | deWaard, J.R.                  | 07-Aug-2006 | Canada  | British Columbia | nr. Houston                          | MOFR MPB sitr                    | 93T                              | 54,6170005E | -126,4110031 |             |
| 08-JDWBC-1868    | 658 | JX008335 | Noctuidae  | Noctuidae  | Xestia speciosa | Hübner     | deWaard, J.R.                  | 07-Aug-2006 | Canada  | British Columbia | nr. Houston                          | MOFR MPB sitr                    | 93T                              | 54,6170005E | -126,4110031 |             |
| 08-JDWBC-1870    | 658 | JX008327 | Noctuidae  | Noctuidae  | Xestia speciosa | Hübner     | deWaard, J.R.                  | 07-Aug-2006 | Canada  | British Columbia | nr. Houston                          | MOFR MPB sitr                    | 93T                              | 54,6170005E | -126,4110031 |             |
| 08-JDWBC-1872    | 658 | JX008297 | Noctuidae  | Noctuidae  | Xestia speciosa | Hübner     | deWaard, J.R.                  | 07-Aug-2006 | Canada  | British Columbia | nr. Houston                          | MOFR MPB sitr                    | 93T                              | 54,6170005E | -126,4110031 |             |
| 08-JDWBC-1873    | 658 | JX008438 | Noctuidae  | Noctuidae  | Xestia speciosa | Hübner     | deWaard, J.R.                  | 07-Aug-2006 | Canada  | British Columbia | nr. Houston                          | MOFR MPB sitr                    | 93T                              | 54,6170005E | -126,4110031 |             |
| 08-JDWBC-1876    | 658 | JX008213 | Noctuidae  | Noctuidae  | Xestia speciosa | Hübner     | deWaard, J.R.                  | 07-Aug-2006 | Canada  | British Columbia | nr. Houston                          | MOFR MPB sitr                    | 93T                              | 54,6170005E | -126,4110031 |             |
| 08-JDWBC-1877    | 658 | JX008489 | Noctuidae  | Noctuidae  | Xestia speciosa | Hübner     | deWaard, J.R.                  | 07-Aug-2006 | Canada  | British Columbia | nr. Houston                          | MOFR MPB sitr                    | 93T                              | 54,6170005E | -126,4110031 |             |
| 08-JDWBC-2314    | 658 | JX008420 | Noctuidae  | Noctuidae  | Xestia speciosa | Hübner     | deWaard, J.R.                  | 06-Aug-2006 | Canada  | British Columbia | nr. Hazelton                         | Date Cr. Silvicultural System    | A3-T2                            | 55,4640007  | -127,809997E |             |
| 10BBCLP-1651     | 658 | JF842644 | Noctuidae  | Noctuidae  | Xestia speciosa | Hübner     | deWaard, J.R.                  | 23-Jul-2010 | Canada  | British Columbia | Yoho NF                              | Lake O'Hara Parking area         | Side of gravel road              | 51,4469986  | -116,323997E |             |
| 10BBCLP-1651     | 658 | JF842645 | Noctuidae  | Noctuidae  | Xestia speciosa | Hübner     | deWaard, J.R.                  | 23-Jul-2010 | Canada  | British Columbia | Yoho NF                              | Lake O'Hara Parking area         | Side of gravel road              | 51,4469986  | -116,323997E |             |
| 10BBCLP-1652     | 658 | JF842646 | Noctuidae  | Noctuidae  | Xestia speciosa | Hübner     | deWaard, J.R.                  | 23-Jul-2010 | Canada  | British Columbia | Yoho NF                              | Lake O'Hara Parking area         | Side of gravel road              | 51,4469986  | -116,323997E |             |
| 10BBCLP-1652     | 658 | JF842647 | Noctuidae  | Noctuidae  | Xestia speciosa | Hübner     | deWaard, J.R.                  | 23-Jul-2010 | Canada  | British Columbia | Yoho NF                              | Lake O'Hara Parking area         | Side of gravel road              | 51,4469986  | -116,323997E |             |
| 10BBCLP-1654     | 658 | JF842648 | Noctuidae  | Noctuidae  | Xestia speciosa | Hübner     | deWaard, J.R.                  | 23-Jul-2010 | Canada  | British Columbia | Yoho NF                              | Lake O'Hara Parking area         | Side of gravel road              | 51,4469986  | -116,323997E |             |
| 10BBCLP-1655     | 658 | JF842649 | Noctuidae  | Noctuidae  | Xestia speciosa | Hübner     | deWaard, J.R.                  | 28-Jul-2010 | Canada  | British Columbia | Kootenay NP                          | Olive Lake Trl.                  | Mixed forest around shallow lake | 50,6749924  | -115,930999E |             |
| 10BBCLP-1656     | 658 | JF842650 | Noctuidae  | Noctuidae  | Xestia speciosa | Hübner     | deWaard, J.R.                  | 20-Jul-2010 | Canada  | British Columbia | Yoho NF                              | Kicking Horse Cmpgrd             | Forested cmpgrd                  | 51,4239997E | -116,429000E |             |
| 10BBCLP-1657     | 658 | JF842651 | Noctuidae  | Noctuidae  | Xestia speciosa | Hübner     | deWaard, J.R.                  | 16-Jul-2010 | Canada  | British Columbia | Glacier NF                           | Loop Trl                         | Riverside fores                  | 51,2560005E | -117,538002  |             |
| 10BBCLP-1658     | 658 | JF842652 | Noctuidae  | Noctuidae  | Xestia speciosa | Hübner     | deWaard, J.R.                  | 16-Jul-2010 | Canada  | British Columbia | Glacier NF                           | Loop Trl                         | Riverside fores                  | 51,2560005E | -117,538002  |             |
| 10-JDWBC-0018    | 658 | HM862547 | Noctuidae  | Noctuidae  | Xestia speciosa | Hübner     | deWaard, J.R.                  | 12-Jul-2006 | Canada  | British Columbia | nr. Hazelton                         | Date Creek Silvicultural System  | A4-T                             | 55,4370002  | -127,801002E |             |
| 10-JDWBC-0109    | 658 | HM862728 | Noctuidae  | Noctuidae  | Xestia speciosa | Hübner     | deWaard, J.R.                  | 12-Jul-2006 | Canada  | British Columbia | nr. Hazelton                         | Date Creek Silvicultural System  | A4-T                             | 55,4650011  | -127,805999E |             |
| 10-JDWBC-0218    | 658 | HM863922 | Noctuidae  | Noctuidae  | Xestia speciosa | Hübner     | deWaard, J.R.                  | 12-Jul-2006 | Canada  | British Columbia | nr. Hazelton                         | Date Creek Silvicultural System  | B5-T                             | 55,42899814 | -127,8030014 |             |
| 10-JDWBC-0347    | 625 | HM865338 | Noctuidae  | Noctuidae  | Xestia speciosa | Hübner     | deWaard, J.R.                  | 12-Jul-2006 | Canada  | British Columbia | nr. Hazelton                         | Date Creek Silvicultural System  | B3-T                             | 55,4389991E | -127,809997E |             |
| 10-JDWBC-0436    | 658 | HM866968 | Noctuidae  | Noctuidae  | Xestia speciosa | Hübner     | deWaard, J.R.                  | 12-Jul-2006 | Canada  | British Columbia | nr. Hazelton                         | Date Creek Silvicultural System  | B3-T                             | 55,4389991E | -127,814003  |             |
| 10-JDWBC-0497    | 658 | HM866977 | Noctuidae  | Noctuidae  | Xestia speciosa | Hübner     | deWaard, J.R.                  | 12-Jul-2006 | Canada  | British Columbia | nr. Hazelton                         | Date Creek Silvicultural System  | B3-T                             | 55,4389991E | -127,814003  |             |
| 10-JDWBC-0498    | 658 | HM866988 | Noctuidae  | Noctuidae  | Xestia speciosa | Hübner     | deWaard, J.R.                  | 12-Jul-2006 | Canada  | British Columbia | nr. Hazelton                         | Date Creek Silvicultural System  | B3-T                             | 55,4389991E | -127,814003  |             |
| 10-JDWBC-0499    | 658 | HM866998 | Noctuidae  | Noctuidae  | Xestia speciosa | Hübner     | deWaard, J.R.                  | 12-Jul-2006 | Canada  | British Columbia | nr. Hazelton                         | Date Creek Silvicultural System  | B3-T                             | 55,4389991E | -127,814003  |             |
| 10-JDWBC-0500    | 658 | HM867008 | Noctuidae  | Noctuidae  | Xestia speciosa | Hübner     | deWaard, J.R.                  | 12-Jul-2006 | Canada  | British Columbia | nr. Hazelton                         | Date Creek Silvicultural System  | B3-T                             | 55,4389991E | -127,814003  |             |
| 10-JDWBC-0501    | 658 | HM867017 | Noctuidae  | Noctuidae  | Xestia speciosa | Hübner     | deWaard, J.R.                  | 12-Jul-2006 | Canada  | British Columbia | nr. Hazelton                         | Date Creek Silvicultural System  | B3-T                             | 55,4389991E | -127,814003  |             |
| 10-JDWBC-0502    | 658 | HM867028 | Noctuidae  | Noctuidae  | Xestia speciosa | Hübner     | deWaard, J.R.                  | 12-Jul-2006 | Canada  | British Columbia | nr. Hazelton                         | Date Creek Silvicultural System  | B3-T                             | 55,4389991E | -127,814003  |             |
| 10-JDWBC-0503    | 658 | HM867038 | Noctuidae  | Noctuidae  | Xestia speciosa | Hübner     | deWaard, J.R.                  | 12-Jul-2006 | Canada  | British Columbia | nr. Hazelton                         | Date Creek Silvicultural System  | B3-T                             | 55,4389991E | -127,814003  |             |
| 10-JDWBC-0648    | 658 | HM868598 | Noctuidae  | Noctuidae  | Xestia speciosa | Hübner     | deWaard, J.R.                  | 12-Jul-2006 | Canada  | British Columbia | nr. Hazelton                         | Date Cr. Silvicultural System    | A2-T                             | 55,4659996  | -127,8150024 |             |
| 10-JDWBC-0815    | 658 | HM870251 | Noctuidae  | Noctuidae  | Xestia speciosa | Hübner     | deWaard, J.R.                  | 12-Jul-2006 | Canada  | British Columbia | nr. Hazelton                         | Date Creek Silvicultural System  | B2-T                             | 55,4589996E | -127,811996E |             |
| 10-JDWBC-0915    | 658 | HM870351 | Noctuidae  | Noctuidae  | Xestia speciosa | Hübner     | deWaard, J.R.                  | 30-Jul-2006 | Canada  | British Columbia | nr. Hazelton                         | Date Creek Silvicultural System  | B4-T                             | 55,4309997E | -127,809997E |             |
| 10-JDWBC-0935    | 658 | HM870371 | Noctuidae  | Noctuidae  | Xestia speciosa | Hübner     | deWaard, J.R.                  | 30-Jul-2006 | Canada  | British Columbia | nr. Hazelton                         | Date Creek Silvicultural System  | B4-T                             | 55,4309997E | -127,809997E |             |
| 10-JDWBC-3087    | 658 | HM864916 | Noctuidae  | Noctuidae  | Xestia speciosa | Hübner     | deWaard, J.R.                  | 30-Jul-2006 | Canada  | British Columbia | nr. Hazelton                         | Date Cr. Silvicultural System    | B5-T                             | 55,42899814 | -127,8030014 |             |
| 10-JDWBC-3089    | 658 | HM864918 | Noctuidae  | Noctuidae  | Xestia speciosa | Hübner     | deWaard, J.R.                  | 30-Jul-2006 | Canada  | British Columbia | nr. Hazelton                         | Date Cr. Silvicultural System    | B5-T                             | 55,42899814 | -127,8030014 |             |
| 10-JDWBC-3466    | 658 | HM865331 | Noctuidae  | Noctuidae  | Xestia speciosa | Hübner     | deWaard, J.R.                  | 30-Jul-2006 | Canada  | British Columbia | nr. Hazelton                         | Date Creek Silvicultural System  | B2-T                             | 55,4589996E | -127,811996E |             |
| 10-JDWBC-3788    | 658 | HM865688 | Noctuidae  | Noctuidae  | Xestia speciosa | Hübner     | deWaard, J.R.                  | 30-Jul-2006 | Canada  | British Columbia | nr. Hazelton                         | Date Creek Silvicultural System  | B3-T                             | 55,4389991E | -127,814003  |             |
| 10-JDWBC-3795    | 658 | HM865691 | Noctuidae  | Noctuidae  | Xestia speciosa | Hübner     | deWaard, J.R.                  | 30-Jul-2006 | Canada  | British Columbia | nr. Hazelton                         | Date Creek Silvicultural System  | B3-T                             | 55,4389991E | -127,814003  |             |
| 10-JDWBC-4109    | 658 | HM866038 | Noctuidae  | Noctuidae  | Xestia speciosa | Hübner     | deWaard, J.R.                  | 30-Jul-2006 | Canada  | British Columbia | nr. Hazelton                         | Date Cr. Silvicultural System    | A2-T                             | 55,4659996  | -127,8150024 |             |
| 10-JDWBC-4110    | 658 | HM866038 | Noctuidae  | Noctuidae  | Xestia speciosa | Hübner     | deWaard, J.R.                  | 30-Jul-2006 | Canada  | British Columbia | nr. Hazelton                         | Date Cr. Silvicultural System    | A2-T                             | 55,4659996  | -127,8150024 |             |
| 10-JDWBC-4425    | 658 | HM866388 | Noctuidae  | Noctuidae  | Xestia speciosa | Hübner     | deWaard, J.R.                  | 30-Jul-2006 | Canada  | British Columbia | nr. Hazelton                         | Date Creek Silvicultural System  | B1-T                             | 55,4370002  | -127,801002E |             |
| 10-JDWBC-4426    | 658 | HM866381 | Noctuidae  | Noctuidae  | Xestia speciosa | Hübner     | deWaard, J.R.                  | 30-Jul-2006 | Canada  | British Columbia | nr. Hazelton                         | Date Creek Silvicultural System  | B1-T                             | 55,4370002  | -127,801002E |             |
| 10-JDWBC-4427    | 658 | HM866388 | Noctuidae  | Noctuidae  | Xestia speciosa | Hübner     | deWaard, J.R.                  | 30-Jul-2006 | Canada  | British Columbia | nr. Hazelton                         | Date Creek Silvicultural System  | B1-T                             | 55,4370002  | -127,801002E |             |
| 10-JDWBC-4681    | 658 | HM866658 | Noctuidae  | Noctuidae  | Xestia speciosa | Hübner     | deWaard, J.R.                  | 30-Jul-2006 | Canada  | British Columbia | nr. Hazelton                         | Date Cr. Silvicultural System    | A4-T                             | 55,4650011  | -127,805999E |             |
| MM00840          | 658 | HM871213 | Noctuidae  | Noctuidae  | Xestia speciosa | Hübner     | Marko Mutanen                  |             | Finland |                  | Ostrobothnia borealis pars australis |                                  | Kiminki                          | 65,07099915 | 25,72500038  |             |
| MM02739          | 658 | HM871686 | Noctuidae  | Noctuidae  | Xestia speciosa | Hübner     | Marko Mutanen                  |             | Finland |                  | Ostrobothnia borealis pars australis |                                  | Kiminki                          | 65,07099915 | 25,72500038  |             |
| MM06113          | 658 | HM873046 | Noctuidae  | Noctuidae  | Xestia speciosa | Hübner     | Panu Vaelimaek                 |             | Finland |                  | Regio kuusamoensis                   |                                  | Kuusamc                          | 66,22299951 | 29,4220008E  |             |
| MM08072          | 658 | HM873766 | Noctuidae  | Noctuidae  | Xestia speciosa | Hübner     | Marko Mutanen, Panu Vaelimaeki |             | Finland |                  | Lapponia kemensis pars occidentalis  |                                  | Kolari                           | 67,27600098 | 23,75300026  |             |
| MM08073          | 658 | HM873767 | Noctuidae  | Noctuidae  | Xestia speciosa | Hübner     | Marko Mutanen, Panu Vaelimaeki |             | Finland |                  | Lapponia kemensis pars occidentalis  |                                  | Kolari                           | 67,27600098 | 23,75300026  |             |
| MM15113          | 658 | HM876782 | Noctuidae  | Noctuidae  | Xestia speciosa | Hübner     | Nils Ryrholm                   |             | Sweden  |                  | Haerjedaler                          |                                  | Funaesdaler                      | 62,3303985E | 12,3227996E  |             |
| MM15114          | 658 | HM876783 | Noctuidae  | Noctuidae  | Xestia speciosa | Hübner     | Nils Ryrholm                   |             | Sweden  |                  | Haerjedaler                          |                                  | Funaesdaler                      | 62,3303985E | 12,3227996E  |             |
| MM15132          | 658 | HM876784 | Noctuidae  | Noctuidae  | Xestia speciosa | Hübner     | Nils Ryrholm                   |             | Sweden  |                  | Haerjedaler                          |                                  | Sveg                             | 62,6576004  | 14,14680004  |             |
| MM15133          | 658 | HM876785 | Noctuidae  | Noctuidae  | Xestia speciosa | Hübner     | Nils Ryrholm                   |             | Sweden  |                  | Haerjedaler                          |                                  | Sveg                             | 62,6576004  | 14,14680004  |             |
| MM15134          | 658 | HM876786 | Noctuidae  | Noctuidae  | Xestia speciosa | Hübner     | Nils Ryrholm                   |             | Sweden  |                  | Haerjedaler                          |                                  | Sveg                             | 62,6576004  | 14,14680004  |             |
| MM15135          | 658 | HM876787 | Noctuidae  | Noctuidae  | Xestia speciosa | Hübner     | Nils Ryrholm                   |             | Sweden  |                  | Haerjedaler                          |                                  | Sveg                             | 62,6576004  | 14,14680004  |             |
| MM15136          | 658 | HM876788 | Noctuidae  | Noctuidae  | Xestia speciosa | Hübner     | Nils Ryrholm                   |             | Sweden  |                  | Haerjedaler                          |                                  | Sveg                             | 62,6576004  | 14,14680004  |             |
| MM15137          | 658 | HM876789 | Noctuidae  | Noctuidae  | Xestia speciosa | Hübner     | Nils Ryrholm                   |             | Sweden  |                  | Haerjedaler                          |                                  | Sveg                             | 62,6576004  | 14,14680004  |             |
| MM15138          | 658 | HM876790 | Noctuidae  | Noctuidae  | Xestia speciosa | Hübner     | Nils Ryrholm                   |             | Sweden  |                  | Haerjedaler                          |                                  | Sveg                             | 62,6576004  | 14,14680004  |             |
| MM15139          | 658 | HM876791 | Noctuidae  | Noctuidae  | Xestia speciosa | Hübner     | Nils Ryrholm                   |             | Sweden  |                  | Haerjedaler                          |                                  | Sveg                             | 62,6576004  | 14,14680004  |             |
| MM1876C          | 658 | JF854608 | Noctuidae  | Noctuidae  | Xestia speciosa | Hübner     | Reima Leinoner                 | 16-Jul-1998 | Finland |                  |                                      |                                  | Venehjærvt                       |             |              |             |
| MM1876E          | 658 | JF854609 | Noctuidae  | Noctuidae  | Xestia speciosa | Hübner     | Reima Leinoner                 | 28-Jul-2001 | Russia  |                  |                                      |                                  | Kuhmc                            |             |              |             |
| MM1876F          | 658 | JF854610 | Noctuidae  | Noctuidae  | Xestia speciosa | Hübner     | Reima Leinoner                 | 31-Jul-2003 | Finland |                  | Ostrobothnia kajaniensi              |                                  |                                  | 64,2850036E | 28,7959998E  |             |
| TLMF Lep 0016E   | 636 | GU689157 | Noctuidae  | Noctuidae  | Xestia speciosa | Hübner     | Huemer P. & Erlebach S         | 25-Aug-2005 | Austria | Salzburg         |                                      | Widgerlostal, S Trisslalm- Krimm |                                  | 47,1899986E | 12,1129999E  |             |
| TLMF Lep 0017E   | 657 | GU689158 | Noctuidae  | Noctuidae  | Xestia speciosa | Hübner     | Huemer P. & Erlebach S         | 25-Aug-2005 | Austria | Salzburg         |                                      | Widgerlostal, S Trisslalm- Krimm |                                  | 47,1899986E | 12,1129999E  |             |
| TLMF Lep 0018E   | 658 | GU689197 | Noctuidae  | Noctuidae  | Xestia speciosa | Hübner     | Huemer P                       | 21-Jul-2006 | Austria | Vorarlberg       |                                      | Fohramos SE                      |                                  | 47,4189987E | 9,8070001E   |             |
| TLMF Lep 0018E   | 590 | GU689151 | Noctuidae  | Noctuidae  | Xestia speciosa | Hübner     | Huemer P                       | 21-Jul-2006 | Austria | Vorarlberg       |                                      | Fohramos SE                      |                                  | 47,4189987E | 9,8070001E   |             |
| TLMF Lep 0025E   | 658 | HM42575E | Noctuidae  | Noctuidae  | Xestia speciosa | Hübner     | Huemer P                       | 13-Jul-2006 | Austria | Karnten          |                                      |                                  |                                  | 46,5060997  | 14,75699997  |             |
| TLMF Lep 0031E   | 658 | HM425811 | Noctuidae  | Noctuidae  | Xestia speciosa | Hübner     | Huemer P.                      | 20-Jul-2009 | Italy   |                  | Belluno                              |                                  | Petzen N. Obere Kirsch           | 46,5223999  | 12,00699999  |             |
| TLMF Lep 0245E   | 658 | JF859999 | Noctuidae  | Noctuidae  | Xestia speciosa | Hübner     | Huemer P                       | 19-Jul-2011 | Italy   | South Tyro       |                                      | Udine                            |                                  | 46,59700011 | 11,43900011  |             |
| TLMF Lep 0296E   | 658 | JF860402 | Noctuidae  | Noctuidae  | Xestia speciosa | Hübner     | Huemer P.                      | 26-Jul-2001 | Italy   |                  |                                      | Pontebba/ Torbiera di Pramoll    |                                  | 46,5559997E | 13,2899995E  |             |
| TLMF Lep 0297E   | 658 | JF860403 | Noctuidae  | Noctuidae  | Xestia speciosa | Hübner     | Huemer P.                      | 17-Jul-2007 | Austria | Tyrol            |                                      | Osttirol                         |                                  | 46,95100021 | 12,31000042  |             |
| TLMF Lep 0443E   | 658 | JN284164 | Noctuidae  | Noctuidae  | Xestia speciosa | Hübner     | Huemer P                       | 26-Jul-2005 | Austria | Vorarlberg       |                                      | Fohramos ENE                     |                                  | 47,4212998E | 9,80632972T  |             |
| TLMF Lep 0443E   | 658 | JN284165 | Noctuidae  | Noctuidae  | Xestia speciosa | Hübner     | Huemer P                       | 26-Jul-2005 | Austria | Vorarlberg       |                                      | Fohramos ENE                     |                                  | 47,4212998E | 9,80632972T  |             |
| BC ZSM Lep 3663E | 420 | JX034579 | Zygaenidae | Zygaenidae | Zygaena exulans | Hohenwarth | Marko Mutanen                  | 08-Jul-2002 | Finland |                  | Tyrol                                |                                  | Schlesi Gletschsjöech            |             | 51,0829993E  |             |
| MM1579E          | 658 | HQ570411 | Zygaenidae | Zygaenidae | Zygaena exulans | Hohenwarth | Marko Mutanen                  |             | Finland |                  |                                      | Lapponia onotekiensi             |                                  | Enontekiö   | 68,9970016E  | 20,7439994E |
| MM1579A          | 658 | HQ570411 | Zygaenidae | Zygaenidae | Zygaena exulans | Hohenwarth | Marko Mutanen                  |             | Finland |                  |                                      | Lapponia onotekiensi             |                                  | Enontekiö   | 68,9970016E  | 20,7        |

|                |     |          |            |            |                  |            |           |             |             |                            |          |                                                          |             |             |
|----------------|-----|----------|------------|------------|------------------|------------|-----------|-------------|-------------|----------------------------|----------|----------------------------------------------------------|-------------|-------------|
| TLMF Lep 0182: | 658 | HQ968290 | Zygaenidae | Zygaeninae | Zygaena exulans: | Hohenwarth | Mayr T.   | 01-Aug-2006 | Switzerland | Graubunder                 |          | Val Bever, Alp Suvrett                                   | 46,54999924 | 9,783329964 |
| TLMF Lep 0182: | 658 | HQ968291 | Zygaenidae | Zygaeninae | Zygaena exulans: | Hohenwarth | Mayr T.   | 01-Aug-2006 | Switzerland | Graubunder                 |          | Val Bever, Alp Suvrett                                   | 46,54999924 | 9,783329964 |
| TLMF Lep 02014 | 658 | HQ968424 | Zygaenidae | Zygaeninae | Zygaena exulans  | Hohenwarth | Huemer P. | 13-Jul-2010 | Italy       | Abruzzi                    | L'Aquila | NP Gran Sasso, Campo Imperatore, E Observatori Col Agnel | 42,44829941 | 13,57330036 |
| TLMF Lep 02912 | 658 | JX034643 | Zygaenidae | Zygaeninae | Zygaena exulans  | Hohenwarth | Huemer P. | 04-Aug-2010 | France      | Provence-Alpes-Cote d'Azur |          | Col Agnel                                                | 44,68899918 | 6,984000206 |
| TLMF Lep 02913 | 658 | JX034620 | Zygaenidae | Zygaeninae | Zygaena exulans  | Hohenwarth | Huemer P. | 04-Aug-2010 | France      | Provence-Alpes-Cote d'Azur |          | Col Agnel                                                | 44,68899918 | 6,984000206 |
