# Supplementary material for: Allopatry as a Gordian Knot for Taxonomists: Patterns of DNA Barcode Divergence in Arctic-Alpine Lepidoptera
Source: PubMed Central journal article supplement (PMC3469483; doi:10.1371/journal.pone.0047214), 2012-10-11
Supplement: pone.0047214.s002.pdf [file pone.0047214.s002.pdf]

Table S2. Provisional check-list of arctic-alpine and boreo-montane species shared between the Alps and Fennoscandia but not barcoded from both major distribution areas in this study; taxonomic status of several taxa needs revision.

**Nepticulidae**

*Stigmella vimineticola*

*Stigmella dryadella*

*Enteucha acetosae*

**Adelidae**

*Nematopogon magna*

**Prodoxidae**

*Lampronia aeripennella*

**Tineidae**

*Niditinea truncicolella*

*Nemapogon fungivorella*

*Agnathosia mendicella*

**Psychidae**

*Siederia rupicolella*

*Dahlica charlottae*

**Bucculatricidae**

*Bucculatrix argentisignella*

**Gracillariidae**

*Phyllonorycter pyrifoliella*

*Callisto insperatella*

*Gracillaria loriolella*

**Yponomeutidae**

*Paraswammerdamia conspersella*

**Nepticulidae**

*Lyonetia pulverulentella*

**Elachistidae**

*Depressaria silesiaca*

*Elachista festucicolella*

*Elachista compsa*

*Elachista excelsicola*

*Elachista kilmunella*

*Elachista ornithopodella*

*Elachista tengstromi*

*Elachista tetragonella*

*Elachista zernyi*

**Scythrididae**

*Scythris disparella*

**Coleophoridae**

*Coleophora idaeella*

*Coleophora ledi*

*Coleophora graminicolella*

*Coleophora paradrymidis*

**Gelechiidae**

*Monochroa inflexella*

*Monochroa ferrea*

*Aristotelia heliacella*

*Athrips pruinosa*

*Filatima incomptella*

*Gelechia cuneatella*

*Caryocolum cassella*

*Scrobipalpula diffluella*

**Tortricidae**

*Argyroploce lediana*

*Argyroploce concretana*

*Phiaris dissolutana*

*Aterpia sieversiana*

*Pelochrista huebneriana*

*Epinotia gimmerthaliana*

*Aethes fennicana*

*Clepsidrinella lindebergi*

**Epermenidae**

*Epermenia profugella*

**Crambidae**

*Loxostege manualis*

*Metaxmeste phrygialis*

*Catoptria maculalis*

*Agriphila biarmicus*

**Lycaenidae**

*Plebejus glandon*

*Plebeius orbitulus*

**Nymphalidae**

*Boloria titania*

**Lasiocampidae**

*Eriogaster arbusculae*

**Geometridae**

*Eupithecia conterminata*

*Eupithecia veratraria*

*Baptria tibiale*

*Macaria carbonaria*

**Erebidae**

*Gynaephora selenitica*

**Noctuidae**

*Agrotis fatidica*

*Xestia sincera*

*Spaelotis suecica*

*Sympistis funebris*

*Acronicta cinerea*
