# Supplementary material for: Allopatry as a Gordian Knot for Taxonomists: Patterns of DNA Barcode Divergence in Arctic-Alpine Lepidoptera
Source: PubMed Central journal article supplement (PMC3469483; doi:10.1371/journal.pone.0047214), 2012-10-11
Supplement: pone.0047214.s003.pdf [file pone.0047214.s003.pdf]

Table S3. Minimum, mean and maximum intraspecific variation in DNA barcodes in study species within and between the study regions. NA refers to North America, AL to Alps and FE to Fennoscandia. Species showing over 2% intraspecific divergence within or between the regions in question are shown highlighted.

| <b>Gazoryctra ganna</b>                |        |        |        |               |       |        |
|----------------------------------------|--------|--------|--------|---------------|-------|--------|
|                                        | AL-AL  | FE-FE  | NA-NA  | AL-FE         | AL-NA | FE-NA  |
| mean                                   | 0.3067 | 0.3067 | N/A    | 1.4622        | N/A   | N/A    |
| min                                    | 0.15   | 0      | N/A    | 1.24          | N/A   | N/A    |
| max                                    | 0.46   | 0.46   | N/A    | 1.71          | N/A   | N/A    |
| <b>Stigmella pretiosa</b>              |        |        |        |               |       |        |
|                                        | AL-AL  | FE-FE  | NA-NA  | AL-FE         | AL-NA | FE-NA  |
| mean                                   | N/A    | 0      | N/A    | 0.17          | N/A   | N/A    |
| min                                    | N/A    | 0      | N/A    | 0.17          | N/A   | N/A    |
| max                                    | N/A    | 0      | N/A    | 0.17          | N/A   | N/A    |
| <b>Alloclementia mesospilella</b>      |        |        |        |               |       |        |
|                                        | AL-AL  | FE-FE  | NA-NA  | AL-FE         | AL-NA | FE-NA  |
| mean                                   | N/A    | 0.3066 | N/A    | 0.72          | N/A   | N/A    |
| min                                    | N/A    | 0.15   | N/A    | 0.62          | N/A   | N/A    |
| max                                    | N/A    | 0.46   | N/A    | 0.77          | N/A   | N/A    |
| <b>Incurvaria vetulella</b>            |        |        |        |               |       |        |
|                                        | AL-AL  | FE-FE  | NA-NA  | AL-FE         | AL-NA | FE-NA  |
| mean                                   | 0      | 0.123  | N/A    | <b>2.8213</b> | N/A   | N/A    |
| min                                    | 0      | 0      | N/A    | <b>2.42</b>   | N/A   | N/A    |
| max                                    | 0      | 0.31   | N/A    | <b>3.14</b>   | N/A   | N/A    |
| <b>Lampronia standfussiella</b>        |        |        |        |               |       |        |
|                                        | AL-AL  | FE-FE  | NA-NA  | AL-FE         | AL-NA | FE-NA  |
| mean                                   | 1.08   | 0.2067 | N/A    | 1.735         | N/A   | N/A    |
| min                                    | 1.08   | 0      | N/A    | 1.55          | N/A   | N/A    |
| max                                    | 1.08   | 0.31   | N/A    | <b>2.03</b>   | N/A   | N/A    |
| <b>Sterrhopterix standfussi</b>        |        |        |        |               |       |        |
|                                        | AL-AL  | FE-FE  | NA-NA  | AL-FE         | AL-NA | FE-NA  |
| mean                                   | N/A    | 0.1517 | N/A    | 0.075         | N/A   | N/A    |
| min                                    | N/A    | 0      | N/A    | 0             | N/A   | N/A    |
| max                                    | N/A    | 0.31   | N/A    | 0.15          | N/A   | N/A    |
| <b>Callisto coffeella</b>              |        |        |        |               |       |        |
|                                        | AL-AL  | FE-FE  | NA-NA  | AL-FE         | AL-NA | FE-NA  |
| mean                                   | 0.9655 | 0.385  | N/A    | 1.4019        | N/A   | N/A    |
| min                                    | 0      | 0      | N/A    | 0.31          | N/A   | N/A    |
| max                                    | 1.89   | 0.77   | N/A    | <b>2.37</b>   | N/A   | N/A    |
| <b>Euhypnometoides albithoracellus</b> |        |        |        |               |       |        |
|                                        | AL-AL  | FE-FE  | NA-NA  | AL-FE         | AL-NA | FE-NA  |
| mean                                   | 0.7433 | 0.21   | N/A    | 1.1367        | N/A   | N/A    |
| min                                    | 0.61   | 0.15   | N/A    | 0.64          | N/A   | N/A    |
| max                                    | 0.97   | 0.32   | N/A    | 1.44          | N/A   | N/A    |
| <b>Kessleria fasciapennella</b>        |        |        |        |               |       |        |
|                                        | AL-AL  | FE-FE  | NA-NA  | AL-FE         | AL-NA | FE-NA  |
| mean                                   | 0      | 0.1    | N/A    | 0.05          | N/A   | N/A    |
| min                                    | 0      | 0      | N/A    | 0             | N/A   | N/A    |
| max                                    | 0      | 0.15   | N/A    | 0.15          | N/A   | N/A    |
| <b>Tinagma dryadis</b>                 |        |        |        |               |       |        |
|                                        | AL-AL  | FE-FE  | NA-NA  | AL-FE         | AL-NA | FE-NA  |
| mean                                   | N/A    | 0      | 0.0425 | 0.31          | 1.425 | 1.5855 |
| min                                    | N/A    | 0      | 0      | 0             | 1.28  | 1.44   |

|                                 |       |        |       |             |       |       |
|---------------------------------|-------|--------|-------|-------------|-------|-------|
| max                             | N/A   | 0      | 0.49  | 0.31        | 1.81  | 1.97  |
| <b>Hypatopa segnella</b>        |       |        |       |             |       |       |
|                                 | AL-AL | FE-FE  | NA-NA | AL-FE       | AL-NA | FE-NA |
| mean                            | 0     | N/A    | N/A   | 0.15        | N/A   | N/A   |
| min                             | 0     | N/A    | N/A   | 0.15        | N/A   | N/A   |
| max                             | 0     | N/A    | N/A   | 0.15        | N/A   | N/A   |
| <b>Aplota nigricans</b>         |       |        |       |             |       |       |
|                                 | AL-AL | FE-FE  | NA-NA | AL-FE       | AL-NA | FE-NA |
| mean                            | 0     | 0      | N/A   | 0           | N/A   | N/A   |
| min                             | 0     | 0      | N/A   | 0           | N/A   | N/A   |
| max                             | 0     | 0      | N/A   | 0           | N/A   | N/A   |
| <b>Pseudatemelia elsae</b>      |       |        |       |             |       |       |
|                                 | AL-AL | FE-FE  | NA-NA | AL-FE       | AL-NA | FE-NA |
| mean                            | N/A   | 0      | N/A   | 0.24        | N/A   | N/A   |
| min                             | N/A   | 0      | N/A   | 0.22        | N/A   | N/A   |
| max                             | N/A   | 0      | N/A   | 0.28        | N/A   | N/A   |
| <b>Elachista elsalla</b>        |       |        |       |             |       |       |
|                                 | AL-AL | FE-FE  | NA-NA | AL-FE       | AL-NA | FE-NA |
| mean                            | N/A   | 0      | N/A   | 0.77        | N/A   | N/A   |
| min                             | N/A   | 0      | N/A   | 0.77        | N/A   | N/A   |
| max                             | N/A   | 0      | N/A   | 0.77        | N/A   | N/A   |
| <b>Elachista subalbidella</b>   |       |        |       |             |       |       |
|                                 | AL-AL | FE-FE  | NA-NA | AL-FE       | AL-NA | FE-NA |
| mean                            | 0     | 0.0655 | N/A   | 0.4345      | N/A   | N/A   |
| min                             | 0     | 0      | N/A   | 0.18        | N/A   | N/A   |
| max                             | 0     | 0.36   | N/A   | 0.46        | N/A   | N/A   |
| <b>Depressaria leucocephala</b> |       |        |       |             |       |       |
|                                 | AL-AL | FE-FE  | NA-NA | AL-FE       | AL-NA | FE-NA |
| mean                            | 0     | 0      | N/A   | 0           | N/A   | N/A   |
| min                             | 0     | 0      | N/A   | 0           | N/A   | N/A   |
| max                             | 0     | 0      | N/A   | 0           | N/A   | N/A   |
| <b>Exaeretia ciniflonella</b>   |       |        |       |             |       |       |
|                                 | AL-AL | FE-FE  | NA-NA | AL-FE       | AL-NA | FE-NA |
| mean                            | N/A   | 0.195  | N/A   | 0.124       | N/A   | N/A   |
| min                             | N/A   | 0      | N/A   | 0           | N/A   | N/A   |
| max                             | N/A   | 0.62   | N/A   | 0.47        | N/A   | N/A   |
| <b>Levipalpus hepatariella</b>  |       |        |       |             |       |       |
|                                 | AL-AL | FE-FE  | NA-NA | AL-FE       | AL-NA | FE-NA |
| mean                            | 0.51  | 0      | N/A   | 0.77        | N/A   | N/A   |
| min                             | 0.15  | 0      | N/A   | 0.62        | N/A   | N/A   |
| max                             | 0.77  | 0      | N/A   | 0.92        | N/A   | N/A   |
| <b>Coleophora pappiferella</b>  |       |        |       |             |       |       |
|                                 | AL-AL | FE-FE  | NA-NA | AL-FE       | AL-NA | FE-NA |
| mean                            | N/A   | 0.155  | N/A   | 0.0775      | N/A   | N/A   |
| min                             | N/A   | 0      | N/A   | 0           | N/A   | N/A   |
| max                             | N/A   | 0      | N/A   | 0.31        | N/A   | N/A   |
| <b>Coleophora svenssoni</b>     |       |        |       |             |       |       |
|                                 | AL-AL | FE-FE  | NA-NA | AL-FE       | AL-NA | FE-NA |
| mean                            | N/A   | 0.1    | N/A   | <b>4.67</b> | N/A   | N/A   |
| min                             | N/A   | 0      | N/A   | <b>4.61</b> | N/A   | N/A   |
| max                             | N/A   | 0.15   | N/A   | <b>4.79</b> | N/A   | N/A   |
| <b>Coleophora unigenella</b>    |       |        |       |             |       |       |
|                                 | AL-AL | FE-FE  | NA-NA | AL-FE       | AL-NA | FE-NA |
| mean                            | N/A   | 0      | N/A   | 0.76        | N/A   | N/A   |

|                                 |             |             |             |              |               |               |
|---------------------------------|-------------|-------------|-------------|--------------|---------------|---------------|
| min                             | N/A         | 0           | N/A         | 0.75         | N/A           | N/A           |
| max                             | N/A         | 0           | N/A         | 0.77         | N/A           | N/A           |
| <b>Coleophora uliginosella</b>  |             |             |             |              |               |               |
|                                 | AL-AL       | FE-FE       | NA-NA       | AL-FE        | AL-NA         | FE-NA         |
| mean                            | N/A         | N/A         | N/A         | 0            | N/A           | N/A           |
| min                             | N/A         | N/A         | N/A         | 0            | N/A           | N/A           |
| max                             | N/A         | N/A         | N/A         | 0            | N/A           | N/A           |
| <b>Bryotropia boreella</b>      |             |             |             |              |               |               |
|                                 | AL-AL       | FE-FE       | NA-NA       | AL-FE        | AL-NA         | FE-NA         |
| mean                            | 0.075       | 0           | N/A         | 0.3475       | N/A           | N/A           |
| min                             | 0           | 0           | N/A         | 0.31         | N/A           | N/A           |
| max                             | 0.15        | 0           | N/A         | 0.46         | N/A           | N/A           |
| <b>Caryocolum petrophila</b>    |             |             |             |              |               |               |
|                                 | AL-AL       | FE-FE       | NA-NA       | AL-FE        | AL-NA         | FE-NA         |
| mean                            | 1.325       | 0           | N/A         | 1.2025       | N/A           | N/A           |
| min                             | 0           | 0           | N/A         | 0.77         | N/A           | N/A           |
| max                             | <b>2.03</b> | 0           | N/A         | <b>2.19</b>  | N/A           | N/A           |
| <b>Caryocolum petryi</b>        |             |             |             |              |               |               |
|                                 | AL-AL       | FE-FE       | NA-NA       | AL-FE        | AL-NA         | FE-NA         |
| mean                            | 0.244       | 0           | N/A         | 0.276        | N/A           | N/A           |
| min                             | 0           | 0           | N/A         | 0.15         | N/A           | N/A           |
| max                             | 0.61        | 0           | N/A         | 0.62         | N/A           | N/A           |
| <b>Caryocolum pullatella</b>    |             |             |             |              |               |               |
|                                 | AL-AL       | FE-FE       | NA-NA       | AL-FE        | AL-NA         | FE-NA         |
| mean                            | 0.54        | 0.3333      | 1.87325     | <b>3.31</b>  | <b>4.7539</b> | <b>5.3173</b> |
| min                             | 0.15        | 0           | 0           | <b>2.99</b>  | <b>3.79</b>   | <b>4.78</b>   |
| max                             | 0.93        | 0.46        | <b>4.56</b> | <b>3.47</b>  | <b>5.63</b>   | <b>6.38</b>   |
| <b>Chionodes holosericella</b>  |             |             |             |              |               |               |
|                                 | AL-AL       | FE-FE       | NA-NA       | AL-FE        | AL-NA         | FE-NA         |
| mean                            | 0.064       | 0.1         | N/A         | 0.482667     | N/A           | N/A           |
| min                             | 0           | 0           | N/A         | 0.32         | N/A           | N/A           |
| max                             | 0.16        | 0.15        | N/A         | 0.61         | N/A           | N/A           |
| <b>Chionodes luctuella</b>      |             |             |             |              |               |               |
|                                 | AL-AL       | FE-FE       | NA-NA       | AL-FE        | AL-NA         | FE-NA         |
| mean                            | 0           | 0.1         | N/A         | <b>2.285</b> | N/A           | N/A           |
| min                             | 0           | 0           | N/A         | <b>2.19</b>  | N/A           | N/A           |
| max                             | 0           | 0.15        | N/A         | <b>2.44</b>  | N/A           | N/A           |
| <b>Chionodes lugubrella</b>     |             |             |             |              |               |               |
|                                 | AL-AL       | FE-FE       | NA-NA       | AL-FE        | AL-NA         | FE-NA         |
| mean                            | 0.4133      | 0.21        | 1.9856      | 1.211111     | <b>5.2256</b> | <b>5.4189</b> |
| min                             | 0           | 0.16        | 0           | 0.99         | <b>4.11</b>   | <b>4.77</b>   |
| max                             | 0.62        | 0.31        | <b>3.47</b> | 1.4          | <b>5.95</b>   | <b>6.29</b>   |
| <b>Chionodes viduella</b>       |             |             |             |              |               |               |
|                                 | AL-AL       | FE-FE       | NA-NA       | AL-FE        | AL-NA         | FE-NA         |
| mean                            | 1.025       | 0.937       | N/A         | 1.2984       | N/A           | N/A           |
| min                             | 0           | 0           | N/A         | 0.46         | N/A           | N/A           |
| max                             | 1.55        | <b>2.35</b> | N/A         | <b>2.35</b>  | N/A           | N/A           |
| <b>Gnorimoschema valesiella</b> |             |             |             |              |               |               |
|                                 | AL-AL       | FE-FE       | NA-NA       | AL-FE        | AL-NA         | FE-NA         |
| mean                            | N/A         | 0           | N/A         | 0.62         | N/A           | N/A           |
| min                             | N/A         | 0           | N/A         | 0.62         | N/A           | N/A           |
| max                             | N/A         | 0           | N/A         | 0.62         | N/A           | N/A           |
| <b>Syncopacma karvoneni</b>     |             |             |             |              |               |               |
|                                 | AL-AL       | FE-FE       | NA-NA       | AL-FE        | AL-NA         | FE-NA         |

|                                    |             |              |             |               |               |               |
|------------------------------------|-------------|--------------|-------------|---------------|---------------|---------------|
| mean                               | N/A         | 1.0233       | N/A         | 1.678         | N/A           | N/A           |
| min                                | N/A         | 0            | N/A         | 1.55          | N/A           | N/A           |
| max                                | N/A         | 1.87         | N/A         | 1.71          | N/A           | N/A           |
| <b>Neofaculta infernella</b>       |             |              |             |               |               |               |
|                                    | AL-AL       | FE-FE        | NA-NA       | AL-FE         | AL-NA         | FE-NA         |
| mean                               | 0.5136      | <b>4.810</b> | 1.58        | <b>3.8526</b> | <b>8.9183</b> | <b>5.8769</b> |
| min                                | 0           | 0            | 0           | 0.31          | <b>8.48</b>   | 0.31          |
| max                                | <b>2.29</b> | <b>8.88</b>  | <b>2.37</b> | <b>9.01</b>   | <b>9.28</b>   | <b>9.1</b>    |
| <b>Prolita sexpunctella</b>        |             |              |             |               |               |               |
|                                    | AL-AL       | FE-FE        | NA-NA       | AL-FE         | AL-NA         | FE-NA         |
| mean                               | 0.0858      | 0.5133       | 0.2566      | 0.46          | <b>2.3878</b> | <b>2.4048</b> |
| min                                | N/A         | 0            | 0           | 0             | <b>2.02</b>   | <b>2.02</b>   |
| max                                | 0.31        | 0.77         | 0.62        | 0.83          | <b>2.74</b>   | <b>2.74</b>   |
| <b>Scrobipalpa murinella</b>       |             |              |             |               |               |               |
|                                    | AL-AL       | FE-FE        | NA-NA       | AL-FE         | AL-NA         | FE-NA         |
| mean                               | 0.1         | 0.9267       | N/A         | 0.6178        | N/A           | N/A           |
| min                                | 0           | 0.15         | N/A         | 0             | N/A           | N/A           |
| max                                | 0.15        | 1.39         | N/A         | 1.55          | N/A           | N/A           |
| <b>Scrobipalopsis petasitis</b>    |             |              |             |               |               |               |
|                                    | AL-AL       | FE-FE        | NA-NA       | AL-FE         | AL-NA         | FE-NA         |
| mean                               | 0.0857      | 0            | N/A         | 0.8614        | N/A           | N/A           |
| min                                | 0           | 0            | N/A         | 0.77          | N/A           | N/A           |
| max                                | 0.15        | 0            | N/A         | 0.93          | N/A           | N/A           |
| <b>Oidaematophorus rogenhoferi</b> |             |              |             |               |               |               |
|                                    | AL-AL       | FE-FE        | NA-NA       | AL-FE         | AL-NA         | FE-NA         |
| mean                               | 0.41        | 0.3067       | N/A         | 0.4367        | N/A           | N/A           |
| min                                | 0           | 0            | N/A         | 0.15          | N/A           | N/A           |
| max                                | 0.62        | 0.46         | N/A         | 0.77          | N/A           | N/A           |
| <b>Acleris maccana</b>             |             |              |             |               |               |               |
|                                    | AL-AL       | FE-FE        | NA-NA       | AL-FE         | AL-NA         | FE-NA         |
| mean                               | 0           | 0.0585       | 0.1374      | 0.03          | 0.81          | 0.7830        |
| min                                | 0           | 0            | 0           | 0             | 0.53          | 0.49          |
| max                                | 0           | 0.15         | 0.61        | 0.15          | 1.08          | 1.08          |
| <b>Aethes deutschiana</b>          |             |              |             |               |               |               |
|                                    | AL-AL       | FE-FE        | NA-NA       | AL-FE         | AL-NA         | FE-NA         |
| mean                               | 0.16        | 0.10         | 0.3651      | 0.41          | <b>4.54</b>   | <b>4.64</b>   |
| min                                | 0           | 0            | 0           | 0.17          | <b>4.05</b>   | <b>4.42</b>   |
| max                                | 0.33        | 0.15         | 1.7         | 0.77          | <b>4.93</b>   | <b>4.92</b>   |
| <b>Ancylis habeleri</b>            |             |              |             |               |               |               |
|                                    | AL-AL       | FE-FE        | NA-NA       | AL-FE         | AL-NA         | FE-NA         |
| mean                               | N/A         | 0.0916       | N/A         | 0.0775        | N/A           | N/A           |
| min                                | N/A         | 0            | N/A         | 0.15          | N/A           | N/A           |
| max                                | N/A         | 0.32         | N/A         | 0.31          | N/A           | N/A           |
| <b>Argyroploce arbutella</b>       |             |              |             |               |               |               |
|                                    | AL-AL       | FE-FE        | NA-NA       | AL-FE         | AL-NA         | FE-NA         |
| mean                               | 0           | 0.2033       | N/A         | 0.2567        | N/A           | N/A           |
| min                                | 0           | 0.15         | N/A         | 0.15          | N/A           | N/A           |
| max                                | 0           | 0.31         | N/A         | 0.31          | N/A           | N/A           |
| <b>Argyroploce noricana</b>        |             |              |             |               |               |               |
|                                    | AL-AL       | FE-FE        | NA-NA       | AL-FE         | AL-NA         | FE-NA         |
| mean                               | 0           | 0            | N/A         | 0             | N/A           | N/A           |
| min                                | 0           | 0            | N/A         | 0             | N/A           | N/A           |
| max                                | 0           | 0            | N/A         | 0             | N/A           | N/A           |
| <b>Argyroploce roseomaculana</b>   |             |              |             |               |               |               |

|                               | AL-AL       | FE-FE  | NA-NA | AL-FE         | AL-NA       | FE-NA         |
|-------------------------------|-------------|--------|-------|---------------|-------------|---------------|
| mean                          | 0           | 0      | N/A   | 0.045         | N/A         | N/A           |
| min                           | 0           | 0      | N/A   | 0             | N/A         | N/A           |
| max                           | 0           | 0      | N/A   | 0             | N/A         | N/A           |
| <b>Clepsis rogana</b>         |             |        |       |               |             |               |
|                               | AL-AL       | FE-FE  | NA-NA | AL-FE         | AL-NA       | FE-NA         |
| mean                          | 1.2268      | N/A    | N/A   | 1.3267        | N/A         | N/A           |
| min                           | 0           | N/A    | N/A   | 0.94          | N/A         | N/A           |
| max                           | <b>2.03</b> | N/A    | N/A   | 1.58          | N/A         | N/A           |
| <b>Epinotia mercuriana</b>    |             |        |       |               |             |               |
|                               | AL-AL       | FE-FE  | NA-NA | AL-FE         | AL-NA       | FE-NA         |
| mean                          | 0.678       | 0.1    | N/A   | <b>2.7133</b> | N/A         | N/A           |
| min                           | 0           | 0      | N/A   | <b>2.5</b>    | N/A         | N/A           |
| max                           | 1.24        | 0.15   | N/A   | <b>3.14</b>   | N/A         | N/A           |
| <b>Epinotia nemorivaga</b>    |             |        |       |               |             |               |
|                               | AL-AL       | FE-FE  | NA-NA | AL-FE         | AL-NA       | FE-NA         |
| mean                          | N/A         | 0.785  | N/A   | 0.6975        | N/A         | N/A           |
| min                           | N/A         | 0      | N/A   | 0.31          | N/A         | N/A           |
| max                           | N/A         | 1.55   | N/A   | 1.23          | N/A         | N/A           |
| <b>Grapholita aureolana</b>   |             |        |       |               |             |               |
|                               | AL-AL       | FE-FE  | NA-NA | AL-FE         | AL-NA       | FE-NA         |
| mean                          | 0.17        | 0      | 0     | 0.4213        | 0.085       | 0.47          |
| min                           | 0.17        | 0      | 0     | 0.34          | 0           | 0.46          |
| max                           | 0.17        | 0      | 0     | 0.5           | 0.17        | 0.48          |
| <b>Phiaris schulziana</b>     |             |        |       |               |             |               |
|                               | AL-AL       | FE-FE  | NA-NA | AL-FE         | AL-NA       | FE-NA         |
| mean                          | 0           | 0.3484 | 0.06  | 0.6288        | 1.8275      | <b>2.0953</b> |
| min                           | 0           | 0      | 0     | 0.46          | 1.71        | 1.55          |
| max                           | 0           | 1.08   | 0.16  | 0.77          | <b>2.74</b> | <b>2.52</b>   |
| <b>Phteochroa vulneratana</b> |             |        |       |               |             |               |
|                               | AL-AL       | FE-FE  | NA-NA | AL-FE         | AL-NA       | FE-NA         |
| mean                          | N/A         | 0.3067 | N/A   | 0.23          | N/A         | N/A           |
| min                           | N/A         | 0      | N/A   | 0             | N/A         | N/A           |
| max                           | N/A         | 0.46   | N/A   | 0.46          | N/A         | N/A           |
| <b>Sparganothis praecana</b>  |             |        |       |               |             |               |
|                               | AL-AL       | FE-FE  | NA-NA | AL-FE         | AL-NA       | FE-NA         |
| mean                          | N/A         | 0.1    | N/A   | 0.3633        | N/A         | N/A           |
| min                           | N/A         | 0      | N/A   | 0.27          | N/A         | N/A           |
| max                           | N/A         | 0.15   | N/A   | 0.55          | N/A         | N/A           |
| <b>Synanthedon polaris</b>    |             |        |       |               |             |               |
|                               | AL-AL       | FE-FE  | NA-NA | AL-FE         | AL-NA       | FE-NA         |
| mean                          | N/A         | 0.1233 | N/A   | <b>9.7033</b> | N/A         | N/A           |
| min                           | N/A         | 0      | N/A   | <b>9.42</b>   | N/A         | N/A           |
| max                           | N/A         | 0.22   | N/A   | <b>10.08</b>  | N/A         | N/A           |
| <b>Zygaena exulans</b>        |             |        |       |               |             |               |
|                               | AL-AL       | FE-FE  | NA-NA | AL-FE         | AL-NA       | FE-NA         |
| mean                          | 0.81        | 0.3067 | N/A   | 1.3962        | N/A         | N/A           |
| min                           | 0           | 0      | N/A   | 1.1           | N/A         | N/A           |
| max                           | 1.89        | 0.46   | N/A   | 1.86          | N/A         | N/A           |
| <b>Parnassius phoebus</b>     |             |        |       |               |             |               |
|                               | AL-AL       | FE-FE  | NA-NA | AL-FE         | AL-NA       | FE-NA         |
| mean                          | 0           | N/A    | N/A   | N/A           | 1.55        | N/A           |
| min                           | 0           | N/A    | N/A   | N/A           | 1.55        | N/A           |
| max                           | 0           | N/A    | N/A   | N/A           | 1.55        | N/A           |

| <b>Pyrgus andromedae</b>    |               |        |        |               |               |               |
|-----------------------------|---------------|--------|--------|---------------|---------------|---------------|
|                             | AL-AL         | FE-FE  | NA-NA  | AL-FE         | AL-NA         | FE-NA         |
| mean                        | 0             | 0.1333 | N/A    | 0.7475        | N/A           | N/A           |
| min                         | 0             | 0      | N/A    | 0.62          | N/A           | N/A           |
| max                         | 0             | 0.32   | N/A    | 0.96          | N/A           | N/A           |
| <b>Aricia nicias</b>        |               |        |        |               |               |               |
|                             | AL-AL         | FE-FE  | NA-NA  | AL-FE         | AL-NA         | FE-NA         |
| mean                        | 0             | 0.2033 | N/A    | 0.5667        | N/A           | N/A           |
| min                         | 0             | 0.15   | N/A    | 0.46          | N/A           | N/A           |
| max                         | 0             | 0.31   | N/A    | 0.62          | N/A           | N/A           |
| <b>Plebeius optilete</b>    |               |        |        |               |               |               |
|                             | AL-AL         | FE-FE  | NA-NA  | AL-FE         | AL-NA         | FE-NA         |
| mean                        | N/A           | 0      | 0      | 0.46          | 1.29          | 1.785         |
| min                         | N/A           | 0      | 0      | 0.46          | 1.28          | 1.77          |
| max                         | N/A           | 0      | 0      | 0.46          | 1.3           | 1.8           |
| <b>Boloria eunomia</b>      |               |        |        |               |               |               |
|                             | AL-AL         | FE-FE  | NA-NA  | AL-FE         | AL-NA         | FE-NA         |
| mean                        | 0.336         | 0.1    | 0.0705 | 1.042         | <b>2.2218</b> | 1.8523        |
| min                         | 0             | 0      | 0      | 0.92          | 1.81          | 1.48          |
| max                         | 0.77          | 0.15   | 0.65   | 1.24          | <b>2.5</b>    | <b>2.18</b>   |
| <b>Boloria napaea</b>       |               |        |        |               |               |               |
|                             | AL-AL         | FE-FE  | NA-NA  | AL-FE         | AL-NA         | FE-NA         |
| mean                        | 0.6133        | 0      | N/A    | <b>2.0233</b> | N/A           | N/A           |
| min                         | 0             | 0      | N/A    | 1.71          | N/A           | N/A           |
| max                         | 1.16          | 0      | N/A    | <b>2.34</b>   | N/A           | N/A           |
| <b>Boloria thore</b>        |               |        |        |               |               |               |
|                             | AL-AL         | FE-FE  | NA-NA  | AL-FE         | AL-NA         | FE-NA         |
| mean                        | 0.5289        | 0.21   | N/A    | 0.3985        | N/A           | N/A           |
| min                         | 0             | 0      | N/A    | 0.15          | N/A           | N/A           |
| max                         | 2.38          | 0.32   | N/A    | <b>2.55</b>   | N/A           | N/A           |
| <b>Erebia pandrose</b>      |               |        |        |               |               |               |
|                             | AL-AL         | FE-FE  | NA-NA  | AL-FE         | AL-NA         | FE-NA         |
| mean                        | 0.4068        | 0      | N/A    | 0.3463        | N/A           | N/A           |
| min                         | 0             | 0      | N/A    | 0.15          | N/A           | N/A           |
| max                         | 0.77          | 0      | N/A    | 0.62          | N/A           | N/A           |
| <b>Catoptria furcatella</b> |               |        |        |               |               |               |
|                             | AL-AL         | FE-FE  | NA-NA  | AL-FE         | AL-NA         | FE-NA         |
| mean                        | 0.3067        | 0      | N/A    | 0.2033        | N/A           | N/A           |
| min                         | 0.15          | 0      | N/A    | 0             | N/A           | N/A           |
| max                         | 0.46          | 0      | N/A    | 0.46          | N/A           | N/A           |
| <b>Crambus alienellus</b>   |               |        |        |               |               |               |
|                             | AL-AL         | FE-FE  | NA-NA  | AL-FE         | AL-NA         | FE-NA         |
| mean                        | 0             | 0      | 0.2121 | 0             | <b>3.5388</b> | <b>3.5388</b> |
| min                         | 0             | 0      | 0      | 0             | <b>3.47</b>   | <b>3.47</b>   |
| max                         | 0             | 0      | 0.49   | 0             | <b>3.7</b>    | <b>3.7</b>    |
| <b>Eudonia sudetica</b>     |               |        |        |               |               |               |
|                             | AL-AL         | FE-FE  | NA-NA  | AL-FE         | AL-NA         | FE-NA         |
| mean                        | <b>2.9179</b> | 0      | N/A    | <b>2.865</b>  | N/A           | N/A           |
| min                         | 0             | 0      | N/A    | 1.4           | N/A           | N/A           |
| max                         | <b>6.32</b>   | 0      | N/A    | <b>6.32</b>   | N/A           | N/A           |
| <b>Gesneria centuriella</b> |               |        |        |               |               |               |
|                             | AL-AL         | FE-FE  | NA-NA  | AL-FE         | AL-NA         | FE-NA         |
| mean                        | N/A           | 0      | 0.9758 | 0             | 0.6443        | 0.6277        |
| min                         | N/A           | 0      | 0      | 0             | 0             | 0             |

|                               |        |        |             |               |               |            |
|-------------------------------|--------|--------|-------------|---------------|---------------|------------|
| max                           | N/A    | 0      | <b>2.82</b> | 0             | <b>2.5</b>    | <b>2.5</b> |
| <b>Metaxmeste schrankiana</b> |        |        |             |               |               |            |
|                               | AL-AL  | FE-FE  | NA-NA       | AL-FE         | AL-NA         | FE-NA      |
| mean                          | 0.621  | 0      | N/A         | 0.6825        | N/A           | N/A        |
| min                           | 0      | 0      | N/A         | 0.31          | N/A           | N/A        |
| max                           | 1.11   | 0      | N/A         | 0.95          | N/A           | N/A        |
| <b>Udea decrepitalis</b>      |        |        |             |               |               |            |
|                               | AL-AL  | FE-FE  | NA-NA       | AL-FE         | AL-NA         | FE-NA      |
| mean                          | 0.265  | 0.1    | N/A         | 0.2092        | N/A           | N/A        |
| min                           | 0.15   | 0      | N/A         | 0             | N/A           | N/A        |
| max                           | 0.46   | 0.15   | N/A         | 0.46          | N/A           | N/A        |
| <b>Udea elutalis</b>          |        |        |             |               |               |            |
|                               | AL-AL  | FE-FE  | NA-NA       | AL-FE         | AL-NA         | FE-NA      |
| mean                          | N/A    | 0      | N/A         | 1.58          | N/A           | N/A        |
| min                           | N/A    | 0      | N/A         | 1.55          | N/A           | N/A        |
| max                           | N/A    | 0      | N/A         | 1.64          | N/A           | N/A        |
| <b>Udea inquinatalis</b>      |        |        |             |               |               |            |
|                               | AL-AL  | FE-FE  | NA-NA       | AL-FE         | AL-NA         | FE-NA      |
| mean                          | 0.1    | 0.1    | 0.2173      | 0.1522        | 0.5641        | 0.6191     |
| min                           | 0      | 0      | 0           | 0             | 0.46          | 0.46       |
| max                           | 0.15   | 0.15   | 0.78        | 0.31          | 0.92          | 0.93       |
| <b>Udea nebulalis</b>         |        |        |             |               |               |            |
|                               | AL-AL  | FE-FE  | NA-NA       | AL-FE         | AL-NA         | FE-NA      |
| mean                          | 0.276  | 0.1033 | N/A         | 0.4227        | N/A           | N/A        |
| min                           | 0      | 0      | N/A         | 0.31          | N/A           | N/A        |
| max                           | 0.46   | 0.16   | N/A         | 0.62          | N/A           | N/A        |
| <b>Arichanna melanaria</b>    |        |        |             |               |               |            |
|                               | AL-AL  | FE-FE  | NA-NA       | AL-FE         | AL-NA         | FE-NA      |
| mean                          | N/A    | 0.2033 | 0           | 0.1           | 0             | 0.1033     |
| min                           | N/A    | 0.15   | 0           | 0             | 0             | 0          |
| max                           | N/A    | 0.31   | 0           | 0.15          | 0             | 0.16       |
| <b>Carsia sororiata</b>       |        |        |             |               |               |            |
|                               | AL-AL  | FE-FE  | NA-NA       | AL-FE         | AL-NA         | FE-NA      |
| mean                          | 0.15   | 0.5167 | 1.25        | 0.695         | 1.325         | 1.245      |
| min                           | 0.15   | 0.31   | 1.25        | 0.62          | 0.93          | 0.77       |
| max                           | 0.15   | 0.62   | 1.25        | 0.77          | 1.72          | 1.72       |
| <b>Colostygia turbata</b>     |        |        |             |               |               |            |
|                               | AL-AL  | FE-FE  | NA-NA       | AL-FE         | AL-NA         | FE-NA      |
| mean                          | 0.4618 | 0      | N/A         | <b>3.2447</b> | N/A           | N/A        |
| min                           | 0      | 0      | N/A         | <b>2.99</b>   | N/A           | N/A        |
| max                           | 0.93   | 0      | N/A         | <b>3.53</b>   | N/A           | N/A        |
| <b>Elophos vittaria</b>       |        |        |             |               |               |            |
|                               | AL-AL  | FE-FE  | NA-NA       | AL-FE         | AL-NA         | FE-NA      |
| mean                          | 0.4133 | 0.1    | N/A         | <b>6.2167</b> | N/A           | N/A        |
| min                           | 0      | 0      | N/A         | <b>5.87</b>   | N/A           | N/A        |
| max                           | 0.62   | 0.15   | N/A         | <b>6.47</b>   | N/A           | N/A        |
| <b>Entephria nobiliaria</b>   |        |        |             |               |               |            |
|                               | AL-AL  | FE-FE  | NA-NA       | AL-FE         | AL-NA         | FE-NA      |
| mean                          | 0.3559 | 0      | N/A         | 0.1855        | N/A           | N/A        |
| min                           | 0      | 0      | N/A         | 0             | N/A           | N/A        |
| max                           | 1.87   | 0      | N/A         | 1.71          | N/A           | N/A        |
| <b>Eupithecia cretaceata</b>  |        |        |             |               |               |            |
|                               | AL-AL  | FE-FE  | NA-NA       | AL-FE         | AL-NA         | FE-NA      |
| mean                          | 0.4738 | N/A    | 0.6242      | N/A           | <b>6.3881</b> | N/A        |

|                               |               |             |             |               |             |             |
|-------------------------------|---------------|-------------|-------------|---------------|-------------|-------------|
| min                           | 0             | N/A         | 0           | N/A           | <b>5.78</b> | N/A         |
| max                           | 1.26          | N/A         | 1.4         | N/A           | <b>6.83</b> | N/A         |
| <b>Gnophos obfuscata</b>      |               |             |             |               |             |             |
|                               | AL-AL         | FE-FE       | NA-NA       | AL-FE         | AL-NA       | FE-NA       |
| mean                          | <b>2.1791</b> | 0.1         | N/A         | 1.664         | N/A         | N/A         |
| min                           | 0             | 0           | N/A         | 0.31          | N/A         | N/A         |
| max                           | <b>3.95</b>   | 0.15        | N/A         | <b>3.63</b>   | N/A         | N/A         |
| <b>Lampropteryx otregiata</b> |               |             |             |               |             |             |
|                               | AL-AL         | FE-FE       | NA-NA       | AL-FE         | AL-NA       | FE-NA       |
| mean                          | 0             | 0.075       | N/A         | 0.0375        | N/A         | N/A         |
| min                           | 0             | 0           | N/A         | 0             | N/A         | N/A         |
| max                           | 0             | 0.15        | N/A         | 0.15          | N/A         | N/A         |
| <b>Macaria fusca</b>          |               |             |             |               |             |             |
|                               | AL-AL         | FE-FE       | NA-NA       | AL-FE         | AL-NA       | FE-NA       |
| mean                          | 0.7206        | 0.1         | N/A         | 1.0867        | N/A         | N/A         |
| min                           | 0             | 0           | N/A         | 0.31          | N/A         | N/A         |
| max                           | 1.87          | 0.15        | N/A         | 1.71          | N/A         | N/A         |
| <b>Martania taeniata</b>      |               |             |             |               |             |             |
|                               | AL-AL         | FE-FE       | NA-NA       | AL-FE         | AL-NA       | FE-NA       |
| mean                          | N/A           | 0.5167      | N/A         | 0.31          | N/A         | N/A         |
| min                           | N/A           | 0           | N/A         | 0.15          | N/A         | N/A         |
| max                           | N/A           | 0.78        | N/A         | 0.62          | N/A         | N/A         |
| <b>Perizoma minorata</b>      |               |             |             |               |             |             |
|                               | AL-AL         | FE-FE       | NA-NA       | AL-FE         | AL-NA       | FE-NA       |
| mean                          | 0             | 0           | N/A         | 0             | N/A         | N/A         |
| min                           | 0             | 0           | N/A         | 0             | N/A         | N/A         |
| max                           | 0             | 0           | N/A         | 0             | N/A         | N/A         |
| <b>Psodos coracina</b>        |               |             |             |               |             |             |
|                               | AL-AL         | FE-FE       | NA-NA       | AL-FE         | AL-NA       | FE-NA       |
| mean                          | 0.7755        | 0.0682      | N/A         | 0.9176        | N/A         | N/A         |
| min                           | 0.15          | 0           | N/A         | 0.15          | N/A         | N/A         |
| max                           | 1.39          | 0.15        | N/A         | 1.24          | N/A         | N/A         |
| <b>Rheumaptera hastata</b>    |               |             |             |               |             |             |
|                               | AL-AL         | FE-FE       | NA-NA       | AL-FE         | AL-NA       | FE-NA       |
| mean                          | 0.4221        | 0.318       | N/A         | 0.541         | N/A         | N/A         |
| min                           | 0             | 0           | N/A         | 0             | N/A         | N/A         |
| max                           | 0.95          | 0.5         | N/A         | 0.95          | N/A         | N/A         |
| <b>Rheumaptera subhastata</b> |               |             |             |               |             |             |
|                               | AL-AL         | FE-FE       | NA-NA       | AL-FE         | AL-NA       | FE-NA       |
| mean                          | <b>3.1383</b> | 1.8264      | N/A         | <b>2.4252</b> | N/A         | N/A         |
| min                           | 0             | 0           | N/A         | 0             | N/A         | N/A         |
| max                           | <b>4.75</b>   | <b>5.07</b> | N/A         | <b>5.07</b>   | N/A         | N/A         |
| <b>Xanthorhoe decoloraria</b> |               |             |             |               |             |             |
|                               | AL-AL         | FE-FE       | NA-NA       | AL-FE         | AL-NA       | FE-NA       |
| mean                          | 0.336         | 0.4067      | 0.4862      | 0.7987        | 1.8171      | 1.9893      |
| min                           | 0             | 0           | 0           | 0             | 1.55        | 1.55        |
| max                           | 0.77          | 0.61        | <b>2.22</b> | 1.08          | <b>2.1</b>  | <b>2.37</b> |
| <b>Xanthorhoe incursata</b>   |               |             |             |               |             |             |
|                               | AL-AL         | FE-FE       | NA-NA       | AL-FE         | AL-NA       | FE-NA       |
| mean                          | 0             | N/A         | <b>2.42</b> | N/A           | 1.298       | N/A         |
| min                           | 0             | N/A         | <b>2.42</b> | N/A           | 0.68        | N/A         |
| max                           | 0             | N/A         | <b>2.42</b> | N/A           | 1.71        | N/A         |
| <b>Grammia quenseli</b>       |               |             |             |               |             |             |
|                               | AL-AL         | FE-FE       | NA-NA       | AL-FE         | AL-NA       | FE-NA       |



|                               |        |        |             |               |               |               |
|-------------------------------|--------|--------|-------------|---------------|---------------|---------------|
| mean                          | 0.1533 | 0      | 1.4049      | 1.5767        | <b>5.1497</b> | <b>5.71</b>   |
| min                           | 0      | 0      | 0           | 1.55          | <b>4.12</b>   | <b>4.62</b>   |
| max                           | 0.46   | 0      | <b>4.59</b> | 1.71          | <b>6.12</b>   | <b>5.95</b>   |
| <b>Setema cereola</b>         |        |        |             |               |               |               |
|                               | AL-AL  | FE-FE  | NA-NA       | AL-FE         | AL-NA         | FE-NA         |
| mean                          | 0.09   | 0      | N/A         | 0.4225        | N/A           | N/A           |
| min                           | 0      | 0      | N/A         | 0.31          | N/A           | N/A           |
| max                           | 0.15   | 0      | N/A         | 0.46          | N/A           | N/A           |
| <b>Anarta melanopa</b>        |        |        |             |               |               |               |
|                               | AL-AL  | FE-FE  | NA-NA       | AL-FE         | AL-NA         | FE-NA         |
| mean                          | 0      | 0.075  | N/A         | 0.19          | N/A           | N/A           |
| min                           | 0      | 0      | N/A         | 0.15          | N/A           | N/A           |
| max                           | 0      | 0.15   | N/A         | 0.31          | N/A           | N/A           |
| <b>Coenophila subrosea</b>    |        |        |             |               |               |               |
|                               | AL-AL  | FE-FE  | NA-NA       | AL-FE         | AL-NA         | FE-NA         |
| mean                          | 0.15   | 0      | N/A         | 0.092         | N/A           | N/A           |
| min                           | 0.15   | 0      | N/A         | 0             | N/A           | N/A           |
| max                           | 0.15   | 0      | N/A         | 0.16          | N/A           | N/A           |
| <b>Coranarta cordigera</b>    |        |        |             |               |               |               |
|                               | AL-AL  | FE-FE  | NA-NA       | AL-FE         | AL-NA         | FE-NA         |
| mean                          | 0      | 0.5133 | N/A         | 0.2567        | N/A           | N/A           |
| min                           | 0      | 0.46   | N/A         | 0.15          | N/A           | N/A           |
| max                           | 0      | 0.62   | N/A         | 0.31          | N/A           | N/A           |
| <b>Standfussiana lucernea</b> |        |        |             |               |               |               |
|                               | AL-AL  | FE-FE  | NA-NA       | AL-FE         | AL-NA         | FE-NA         |
| mean                          | 0      | 0.075  | N/A         | 0.19          | N/A           | N/A           |
| min                           | 0      | 0      | N/A         | 0.15          | N/A           | N/A           |
| max                           | 0      | 0.15   | N/A         | 0.31          | N/A           | N/A           |
| <b>Sympistis nigrita</b>      |        |        |             |               |               |               |
|                               | AL-AL  | FE-FE  | NA-NA       | AL-FE         | AL-NA         | FE-NA         |
| mean                          | 0.2817 | 0      | N/A         | <b>2.38</b>   | N/A           | N/A           |
| min                           | 0      | 0      | N/A         | <b>2.34</b>   | N/A           | N/A           |
| max                           | 0.46   | 0      | N/A         | <b>2.5</b>    | N/A           | N/A           |
| <b>Syngrapha hochenwarthi</b> |        |        |             |               |               |               |
|                               | AL-AL  | FE-FE  | NA-NA       | AL-FE         | AL-NA         | FE-NA         |
| mean                          | 0.075  | 0      | N/A         | 0.2708        | N/A           | N/A           |
| min                           | 0      | 0      | N/A         | 0.15          | N/A           | N/A           |
| max                           | 0.15   | 0      | N/A         | 0.31          | N/A           | N/A           |
| <b>Xestia alpicola</b>        |        |        |             |               |               |               |
|                               | AL-AL  | FE-FE  | NA-NA       | AL-FE         | AL-NA         | FE-NA         |
| mean                          | 0      | 0      | N/A         | 0             | N/A           | N/A           |
| min                           | 0      | 0      | N/A         | 0             | N/A           | N/A           |
| max                           | 0      | 0      | N/A         | 0             | N/A           | N/A           |
| <b>Xestia lorezi</b>          |        |        |             |               |               |               |
|                               | AL-AL  | FE-FE  | NA-NA       | AL-FE         | AL-NA         | FE-NA         |
| mean                          | N/A    | 0.2033 | 0.2067      | <b>2.8733</b> | 1.9333        | <b>2.7311</b> |
| min                           | N/A    | 0.15   | 0.15        | <b>2.82</b>   | 1.87          | <b>2.5</b>    |
| max                           | N/A    | 0.31   | 0.31        | <b>2.98</b>   | <b>2.03</b>   | <b>3.04</b>   |
| <b>Xestia speciosa</b>        |        |        |             |               |               |               |
|                               | AL-AL  | FE-FE  | NA-NA       | AL-FE         | AL-NA         | FE-NA         |
| mean                          | 0.1196 | 0.1129 | 0.2343      | <b>2.4771</b> | 1.8861        | 1.7014        |
| min                           | 0      | 0      | 0           | <b>2.18</b>   | 1.55          | 1.39          |
| max                           | 0.34   | 0.31   | 1.7         | <b>2.96</b>   | <b>2.25</b>   | <b>2.66</b>   |
