# Supplementary material for: Allopatry as a Gordian Knot for Taxonomists: Patterns of DNA Barcode Divergence in Arctic-Alpine Lepidoptera
Source: PLoS One. 2012 Oct 11;7(10):e47214. doi: 10.1371/journal.pone.0047214 (PMC3469483; doi:10.1371/journal.pone.0047214)
Supplement: Table S4 — Minimum, mean and maximum variation in DNA barcodes between allopatric species, which morphologically are considered distinct taxa, but which genetically are closely similar. NA refers to North America, AL to Alps and FE to Fennoscandia. Superscript numbers after the species refer to the areas of occurrence as follows: 1 = Alps, 2 = Fennoscandia, 3 = North America. (PDF) [file pone.0047214.s004.pdf]

Table S4. Minimum, mean and maximum variation in DNA barcodes between allopatric species, which morphologically are considered distinct taxa, but which genetically are closely similar. NA refers to North America, AL to Alps and FE to Fennoscandia. Superscript numbers after the species refer to the areas of occurrence as follows: 1=Alps, 2=Fennoscandia, 3=North America

| <b>Gnorimoschema valesiella<sup>1,2</sup>, G. alaskense<sup>3</sup></b>                                                                               |       |       |       |       |       |       |
|-------------------------------------------------------------------------------------------------------------------------------------------------------|-------|-------|-------|-------|-------|-------|
|                                                                                                                                                       | NA-NA | FE-FE | AL-AL | AL-FE | AL-NA | FE-NA |
| mean                                                                                                                                                  | 0.338 | 0     | 0.76  | 0.746 | 2.138 | 2.076 |
| min                                                                                                                                                   | 0     | 0     | 0.32  | 0.62  | 1.621 | 1.869 |
| max                                                                                                                                                   | 1.08  | 0     | 0.98  | 0.98  | 2.829 | 2.505 |
| <b>Stenoptilia alpinalis<sup>1</sup>, S. buvati<sup>1</sup>, S. brigantiensis<sup>1</sup>, S. mercantourica<sup>1</sup>, S. islandica<sup>2</sup></b> |       |       |       |       |       |       |
|                                                                                                                                                       | NA-NA | FE-FE | AL-AL | AL-FE | AL-NA | FE-NA |
| mean                                                                                                                                                  | N/A   | 0     | 0.211 | 0.26  | N/A   | N/A   |
| min                                                                                                                                                   | N/A   | 0     | 0     | 0.15  | N/A   | N/A   |
| max                                                                                                                                                   | N/A   | 0     | 0.467 | 0.47  | N/A   | N/A   |
| <b>Erebia medusa<sup>1</sup>, E. polaris<sup>2</sup></b>                                                                                              |       |       |       |       |       |       |
|                                                                                                                                                       | NA-NA | FE-FE | AL-AL | AL-FE | AL-NA | FE-NA |
| mean                                                                                                                                                  | N/A   | 0     | 0.202 | 0.125 | N/A   | N/A   |
| min                                                                                                                                                   | N/A   | 0     | 0     | 0     | N/A   | N/A   |
| max                                                                                                                                                   | N/A   | 0     | 0.64  | 0.479 | N/A   | N/A   |
| <b>Oeneis glacialis<sup>1</sup>, O. norna<sup>2</sup></b>                                                                                             |       |       |       |       |       |       |
|                                                                                                                                                       | NA-NA | FE-FE | AL-AL | AL-FE | AL-NA | FE-NA |
| mean                                                                                                                                                  | N/A   | 0     | 0.51  | 0.273 | N/A   | N/A   |
| min                                                                                                                                                   | N/A   | 0     | 0.153 | 0     | N/A   | N/A   |
| max                                                                                                                                                   | N/A   | 0     | 1.015 | 0.77  | N/A   | N/A   |
| <b>Xanthorhoe decoloraria<sup>1,2,3</sup></b>                                                                                                         |       |       |       |       |       |       |
|                                                                                                                                                       | NA-NA | FE-FE | AL-AL | AL-FE | AL-NA | FE-NA |
| mean                                                                                                                                                  | 0.4   | 0.407 | 0.338 | 0.799 | 1.817 | 1.989 |
| min                                                                                                                                                   | 0     | 0     | 0     | 0     | 1.55  | 1.55  |
| max                                                                                                                                                   | 1.004 | 0.61  | 0.77  | 1.08  | 2.1   | 2.37  |
| <b>Xanthorhoe decoloraria<sup>1,2</sup>, X. alticolata<sup>3</sup></b>                                                                                |       |       |       |       |       |       |
|                                                                                                                                                       | NA-NA | FE-FE | AL-AL | AL-FE | AL-NA | FE-NA |
| mean                                                                                                                                                  | 0.209 | 0.407 | 0.338 | 0.799 | 1.432 | 1.216 |
| min                                                                                                                                                   | 0     | 0     | 0     | 0     | 1.082 | 0.769 |
| max                                                                                                                                                   | 0.77  | 0.61  | 0.77  | 1.08  | 1.711 | 1.708 |
| <b>Xanthorhoe incursata<sup>1</sup>, X. annotinata<sup>2</sup>, X. baffinensis<sup>3</sup></b>                                                        |       |       |       |       |       |       |
|                                                                                                                                                       | NA-NA | FE-FE | AL-AL | AL-FE | AL-NA | FE-NA |
| mean                                                                                                                                                  | 0.153 | 0.236 | 0     | 0.274 | 0.077 | 0.333 |
| min                                                                                                                                                   | 0     | 0     | 0     | 0.153 | 0     | 0.153 |
| max                                                                                                                                                   | 0.307 | 0.495 | 0     | 0.329 | 0.377 | 0.661 |
| <b>Holoarctia cervini<sup>1</sup>, H. puengeleri<sup>2</sup></b>                                                                                      |       |       |       |       |       |       |
|                                                                                                                                                       | NA-NA | FE-FE | AL-AL | AL-FE | AL-NA | FE-NA |
| mean                                                                                                                                                  | N/A   | 0.115 | 0.69  | 0.353 | N/A   | N/A   |
| min                                                                                                                                                   | N/A   | 0     | 0     | 0.741 | N/A   | N/A   |

|                                                                      |       |       |       |       |       |       |
|----------------------------------------------------------------------|-------|-------|-------|-------|-------|-------|
| max                                                                  | N/A   | 0.172 | 1.035 | 0.926 | N/A   | N/A   |
| <b>Apamea maillardi<sup>1</sup>, A. schildei<sup>2</sup></b>         |       |       |       |       |       |       |
|                                                                      | NA-NA | FE-FE | AL-AL | AL-FE | AL-NA | FE-NA |
| mean                                                                 | N/A   | 0     | 0.982 | 1.388 | N/A   | N/A   |
| min                                                                  | N/A   | 0.527 | 0     | 0.153 | N/A   | N/A   |
| max                                                                  | N/A   | 0.926 | 2.185 | 2.025 | N/A   | N/A   |
| <b>Apamea zeta<sup>1,3</sup>, A. schildei<sup>2</sup></b>            |       |       |       |       |       |       |
|                                                                      | NA-NA | FE-FE | AL-AL | AL-FE | AL-NA | FE-NA |
| mean                                                                 | 2.191 | 0     | 0.278 | 2.138 | 2.78  | 2.734 |
| min                                                                  | 0     | 0.527 | 0     | 1.664 | 0     | 2.501 |
| max                                                                  | 3.422 | 0.926 | 0.926 | 2.505 | 3.67  | 2.988 |
| <b>Coenophila subrosea<sup>1,2</sup>, C. opacifrons<sup>3</sup></b>  |       |       |       |       |       |       |
|                                                                      | NA-NA | FE-FE | AL-AL | AL-FE | AL-NA | FE-NA |
| mean                                                                 | 0     | 0     | 0.15  | 0.076 | 1.395 | 1.364 |
| min                                                                  | 0     | 0     | 0.15  | 0     | 1.474 | 1.286 |
| max                                                                  | 0     | 0     | 0.15  | 0.16  | 1.553 | 1.409 |
| <b>Sympistis nigrita<sup>1,2</sup>, S. zetterstedtii<sup>3</sup></b> |       |       |       |       |       |       |
|                                                                      | NA-NA | FE-FE | AL-AL | AL-FE | AL-NA | FE-NA |
| mean                                                                 | 0.412 | 0.00  | 0.25  | 2.34  | 2.993 | 1.263 |
| min                                                                  | 0     | 0     | 0     | 2.36  | 2.627 | 1.08  |
| max                                                                  | 2.876 | 0     | 0.46  | 2.5   | 4.23  | 2.359 |
| <b>Xestia rhaetica<sup>1</sup>, X. fennica<sup>2</sup></b>           |       |       |       |       |       |       |
|                                                                      | NA-NA | FE-FE | AL-AL | AL-FE | AL-NA | FE-NA |
| mean                                                                 | N/A   | 0.184 | 0.175 | 0.181 | N/A   | N/A   |
| min                                                                  | N/A   | 0     | 0     | 0     | N/A   | N/A   |
| max                                                                  | N/A   | 0.315 | 0.307 | 0.467 | N/A   | N/A   |
